# Supplementary material for: The stability of the primed pool of synaptic vesicles and the clamping of spontaneous neurotransmitter release rely on the integrity of the C-terminal half of the SNARE domain of syntaxin-1A
Source: eLife journal article supplement (doi:10.7554/elife.90775), 2023-10-16
Supplement: fig4-data2 [file elife-90775-fig4-data2-v1.zip]

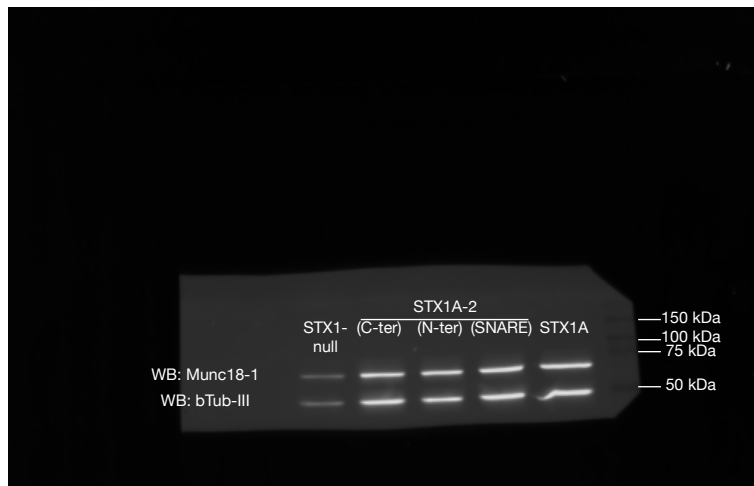

Neuronal lysates, blot **Figure 4D**. Superposition of detected protein and the image of the marker, Blot's opacity was reduced 30% for the visualization of the marker

In Figure 4. the blot was flipped horizontally for visualization purposes

Blot is cut between 50kDa and 37kDa for detection purposes

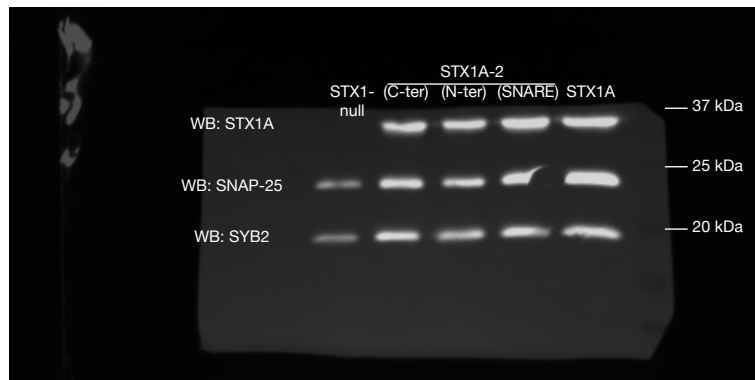

Neuronal lysates, blot **Figure 4D**. Superposition of detected protein and the image of the marker, Blot's opacity was reduced 30% for the visualization of the marker

In Figure 4. the blot was flipped horizontally for visualization purposes
