# Supplementary material for: The stability of the primed pool of synaptic vesicles and the clamping of spontaneous neurotransmitter release rely on the integrity of the C-terminal half of the SNARE domain of syntaxin-1A
Source: eLife journal article supplement (doi:10.7554/elife.90775), 2023-10-16
Supplement: fig5-data2 [file elife-90775-fig5-data2-v1.zip]

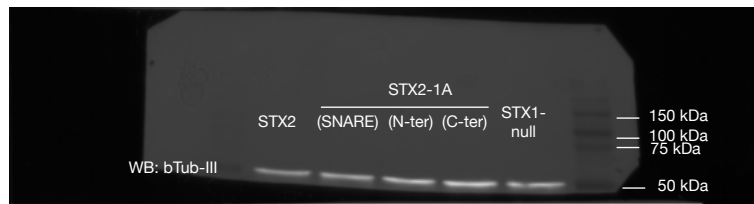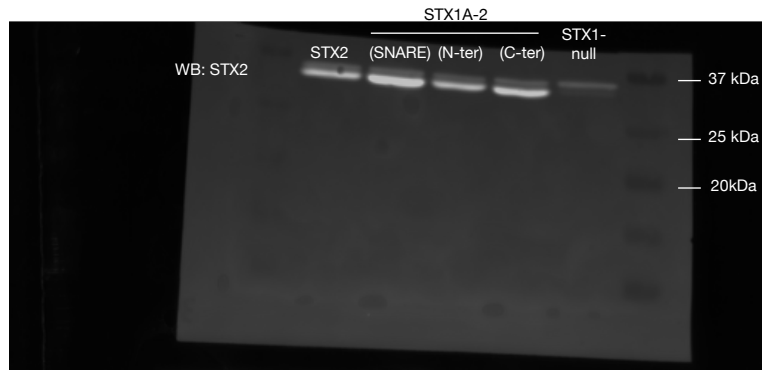

Neuronal lysates, blot **Figure 5C**. Superposition of detected protein and the image of the marker, Blot's opacity was reduced 30% for the visualization of the marker  
Blots were cut between 50 and 37kDa for detection purposes

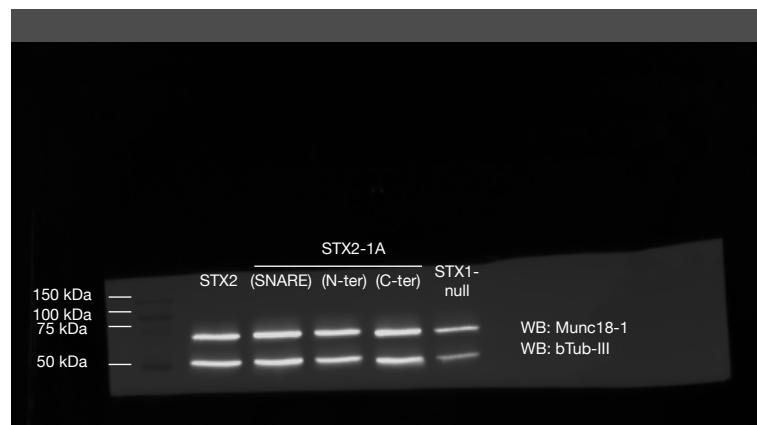

Neuronal lysates, blot **Figure 5D**. Superposition of detected protein and the image of the marker, Blot's opacity was reduced 30% for the visualization of the marker
