# Supplementary material for: The stability of the primed pool of synaptic vesicles and the clamping of spontaneous neurotransmitter release rely on the integrity of the C-terminal half of the SNARE domain of syntaxin-1A
Source: eLife. 2024 Mar 21;12:RP90775. doi: 10.7554/eLife.90775 (PMC10957171; doi:10.7554/eLife.90775)
Supplement: Figure 1—figure supplement 1—source data 1. [file elife-90775-fig1-figsupp1-data1.xlsx]

## Sheet: F1. Figure supplement 1C
Table 1: Quantification of STX1A and STX2 in STX1-null neurons
Parameter measured	Statistical test	Genotype	Number of independent cultures	Number of observations	Parametric distribution 'D'Agostino & Pearson test'	Mean	SEM	Minimum	25% Percentile	Median	75% Percentile	Maximum	Mean ranks	Adjusted p-value (vs STX1- WT)	Adjusted p-value (vs cDKO)
Stx2/VGlut1	Kruskal-Wallis; Dunn's post-hoc	STX1A	3	83	No	0.04275	0.00182	0.01958	0.03176	0.03887	0.04719	0.1046	71.54		<0.0001
		STX2	3	79	No	0.4781	0.02627	0.157	0.2428	0.477	0.6102	1.179	161	<0.0001	<0.0001
		STX1-null	3	38	No	0.03052	0.001148	0.01898	0.0256	0.03002	0.03471	0.05519	37.97	0.0092
