# Supplementary material for: The stability of the primed pool of synaptic vesicles and the clamping of spontaneous neurotransmitter release rely on the integrity of the C-terminal half of the SNARE domain of syntaxin-1A
Source: eLife. 2024 Mar 21;12:RP90775. doi: 10.7554/eLife.90775 (PMC10957171; doi:10.7554/eLife.90775)
Supplement: Figure 1—source data 1. [file elife-90775-fig1-data1.xlsx]

## Sheet: Figure 1C
Table 1: Quantification of the neuronal survival and neurotransmitter release parameters of STX1-null neurons lentiviralli transduced with STX1A WT or STX2 WT
Parameter measured	Statistical test	Genotype	Number of independent cultures	Number of observations	Parametric distribution 'D'Agostino-Pearson test'	Mean	SEM	Minimum	25% Percentile	Median	75% Percentile	Maximum	Mean ranks	Adjusted p-value (vs STX1A WT)
Neuronal density (DIV 8; #/mm2)	Kruskal-Wallis Dunn's post-hoc	STX1A	3	90	No	21.07	1.075	2	14	18.5	28	50	138.1
		STX2	3	90	No	21.46	1.137	4	13	19.5	28.25	55	139.9	>0.9999
		STX1-null	3	89	No	20.03	1.274	3	11	19	24.5	58	126.9	>0.9999

## Sheet: Figure 1D
Table 1: Quantification of the neuronal survival and neurotransmitter release parameters of STX1-null neurons lentiviralli transduced with STX1A WT or STX2 WT
Parameter measured	Statistical test	Genotype	Number of independent cultures	Number of observations	Parametric distribution 'D'Agostino-Pearson test'	Mean	SEM	Median	Mean ranks	Adjusted p-value (vs STX1A WT)	Adjusted p-value (vs STX1-null)
Cell Number (DIV 15 / DIV 8; %)	Kruskal-Wallis Dunn's post-hoc	STX1A	2	60	No	120.4	6.169	118.7	111.4		<0.0001
		STX2	2	60	No	147	9.835	128.1	122.8	0.6703	<0.0001
		cDKO	2	58	No	34.26	0.5402.6972	29.96	32.38	<0.0001
Cell Number (DIV 22 / DIV 8; %)	Kruskal-Wallis Dunn's post-hoc	STX1A	3	88	No	110.7	6.264	87.85	99.67		<0.0001
		STX2	3	89	No	111.7	5.458	5.618	111.8	>0.9999	<0.0001
		cDKO	3	90	No	9.708	1.094	12.4	4.993	<0.0001
Cell Number (DIV 29 / DIV 8; %)	Kruskal-Wallis Dunn's post-hoc	STX1A	2	60	No	99.98	7.659	94.92	111.9		<0.0001
		STX2	2	60	No	128.1	7.802	121.2	129.1	0.2056	<0.0001
		cDKO	2	60	No	3.162	0.5303	0	30.53	<0.0001

## Sheet: Figure 1E
Table 1: Quantification of the neuronal survival and neurotransmitter release parameters of STX1-null neurons lentiviralli transduced with STX1A WT or STX2 WT
Parameter measured	Statistical test	Genotype	Number of independent cultures	Number of observations	Parametric distribution 'D'Agostino-Pearson test'	Mean	SEM	Minimum	25% Percentile	Median	75% Percentile	Maximum	Mean ranks	Adjusted p-value (vs WT)
EPSC Amplitude (nA)	Mann-Whitney test	STX1A-WT	3	34	Yes	4.352	0.5326	0.14	1.603	3.49	7.585	12.34	47.91
		STX2-WT	3	33	No	0.7093	0.1611	0.06	0.1724	0.3237	0.915	3.985	18.67	<0.0001

## Sheet: Figure 1F
Parameter measured	Time (x-axis)	Number of independent cultures	Number of observations	Mean	Number of observations	Mean
Cumulative charge transfer			STX1A		STX2
	0	3	34	7.56828e-05	33	5.2021e-05
	0.0001			7.56828e-05		5.2021e-05
	0.0002			7.56828e-05		5.2021e-05
	0.0003			7.56828e-05		5.2021e-05
	0.0004			7.56828e-05		5.2021e-05
	0.0005			7.56828e-05		5.2021e-05
	0.0006			7.56828e-05		5.2021e-05
	0.0007			7.56828e-05		5.2021e-05
	0.0008			7.56828e-05		5.2021e-05
	0.0009			0.000569191		5.2021e-05
	0.001			0.00154371		5.2021e-05
	0.0011			0.00326849		0.000187396
	0.0012			0.00598768		0.000343312
	0.0013			0.00942103		0.00066069
	0.0014			0.0136228		0.00102191
	0.0015			0.0185794		0.0014462
	0.0016			0.0242519		0.00192848
	0.0017			0.030738		0.00247465
	0.0018			0.0378903		0.0031092
	0.0019			0.0456539		0.00387661
	0.002			0.0539676		0.00477303
	0.0021			0.0627897		0.00579379
	0.0022			0.072076		0.00695288
	0.0023			0.081782		0.00827157
	0.0024			0.0918623		0.00972581
	0.0025			0.102257		0.0113146
	0.0026			0.112919		0.0130431
	0.0027			0.123816		0.0149352
	0.0028			0.134905		0.0169632
	0.0029			0.146148		0.0191207
	0.003			0.157502		0.0214031
	0.0031			0.168921		0.0238176
	0.0032			0.180368		0.0263861
	0.0033			0.191814		0.0290833
	0.0034			0.20324		0.0318927
	0.0035			0.214615		0.0348193
	0.0036			0.225913		0.0378402
	0.0037			0.237114		0.0409485
	0.0038			0.248196		0.0441471
	0.0039			0.259149		0.0474275
	0.004			0.269956		0.0507767
	0.0041			0.280606		0.0542214
	0.0042			0.291088		0.0577201
	0.0043			0.301397		0.0612755
	0.0044			0.311528		0.0648742
	0.0045			0.321474		0.0684994
	0.0046			0.331231		0.0721515
	0.0047			0.340797		0.0758159
	0.0048			0.350174		0.0794947
	0.0049			0.359364		0.0831858
	0.005			0.36837		0.0868941
	0.0051			0.3772		0.0906106
	0.0052			0.385854		0.0943355
	0.0053			0.39433		0.0980934
	0.0054			0.40263		0.101862
	0.0055			0.410761		0.105636
	0.0056			0.41873		0.109417
	0.0057			0.426538		0.113188
	0.0058			0.434184		0.116945
	0.0059			0.441671		0.120695
	0.006			0.449006		0.124431
	0.0061			0.456192		0.128151
	0.0062			0.46323		0.131871
	0.0063			0.47012		0.13558
	0.0064			0.476865		0.139259
	0.0065			0.483471		0.14291
	0.0066			0.48994		0.146533
	0.0067			0.496273		0.150142
	0.0068			0.502475		0.153718
	0.0069			0.508542		0.157275
	0.007			0.514482		0.160797
	0.0071			0.520296		0.164282
	0.0072			0.525984		0.167742
	0.0073			0.531555		0.171176
	0.0074			0.537008		0.174588
	0.0075			0.542346		0.177958
	0.0076			0.547574		0.18129
	0.0077			0.552692		0.184579
	0.0078			0.557699		0.187848
	0.0079			0.562603		0.191094
	0.008			0.567406		0.1943
	0.0081			0.57211		0.197472
	0.0082			0.576716		0.20062
	0.0083			0.581224		0.203721
	0.0084			0.585639		0.206776
	0.0085			0.589966		0.209798
	0.0086			0.594203		0.212794
	0.0087			0.598354		0.215763
	0.0088			0.60242		0.2187
	0.0089			0.606404		0.221602
	0.009			0.610314		0.224476
	0.0091			0.614145		0.227323
	0.0092			0.6179		0.230151
	0.0093			0.621583		0.232967
	0.0094			0.625192		0.235753
	0.0095			0.628727		0.238516
	0.0096			0.632194		0.241242
	0.0097			0.635593		0.243933
	0.0098			0.638924		0.246601
	0.0099			0.642188		0.249258
	0.01			0.645392		0.251891
	0.0101			0.648537		0.254489
	0.0102			0.651619		0.257065
	0.0103			0.654642		0.259622
	0.0104			0.65761		0.262162
	0.0105			0.660521		0.264669
	0.0106			0.663377		0.267159
	0.0107			0.666181		0.269617
	0.0108			0.668933		0.272038
	0.0109			0.671634		0.274427
	0.011			0.674283		0.276794
	0.0111			0.676881		0.279137
	0.0112			0.679431		0.281463
	0.0113			0.681937		0.283767
	0.0114			0.684399		0.286039
	0.0115			0.686816		0.288278
	0.0116			0.689189		0.290484
	0.0117			0.691518		0.292664
	0.0118			0.693806		0.294811
	0.0119			0.696056		0.296933
	0.012			0.698266		0.299041
	0.0121			0.700435		0.301126
	0.0122			0.702564		0.303194
	0.0123			0.704657		0.305243
	0.0124			0.706714		0.307273
	0.0125			0.708737		0.309286
	0.0126			0.710725		0.311292
	0.0127			0.712676		0.313282
	0.0128			0.714594		0.315244
	0.0129			0.71648		0.317184
	0.013			0.718336		0.31911
	0.0131			0.720159		0.321018
	0.0132			0.721951		0.322903
	0.0133			0.723715		0.324766
	0.0134			0.725452		0.326609
	0.0135			0.727161		0.32842
	0.0136			0.72884		0.330216
	0.0137			0.730486		0.331998
	0.0138			0.732108		0.333758
	0.0139			0.733706		0.335509
	0.014			0.735279		0.337223
	0.0141			0.736825		0.338924
	0.0142			0.738344		0.34062
	0.0143			0.739838		0.342303
	0.0144			0.741311		0.343963
	0.0145			0.742762		0.345612
	0.0146			0.744184		0.347225
	0.0147			0.745576		0.34881
	0.0148			0.746951		0.350394
	0.0149			0.748307		0.351984
	0.015			0.749642		0.353567
	0.0151			0.750954		0.355138
	0.0152			0.752241		0.356676
	0.0153			0.753506		0.358209
	0.0154			0.754759		0.359745
	0.0155			0.755995		0.361265
	0.0156			0.757208		0.362764
	0.0157			0.758405		0.364259
	0.0158			0.75959		0.365746
	0.0159			0.760763		0.367223
	0.016			0.761911		0.368697
	0.0161			0.763039		0.370165
	0.0162			0.764153		0.371625
	0.0163			0.76525		0.373072
	0.0164			0.766332		0.374511
	0.0165			0.767397		0.375943
	0.0166			0.768447		0.377349
	0.0167			0.769481		0.378745
	0.0168			0.770499		0.380133
	0.0169			0.771507		0.381507
	0.017			0.772501		0.382875
	0.0171			0.773481		0.384228
	0.0172			0.774448		0.385573
	0.0173			0.775397		0.386903
	0.0174			0.776332		0.388236
	0.0175			0.777254		0.389552
	0.0176			0.778161		0.390859
	0.0177			0.779056		0.39215
	0.0178			0.779936		0.393432
	0.0179			0.780805		0.394705
	0.018			0.781662		0.395968
	0.0181			0.782508		0.397227
	0.0182			0.783343		0.398471
	0.0183			0.784163		0.399713
	0.0184			0.784972		0.400943
	0.0185			0.785771		0.402158
	0.0186			0.786558		0.403358
	0.0187			0.787333		0.404548
	0.0188			0.788097		0.405731
	0.0189			0.788849		0.406909
	0.019			0.789593		0.408079
	0.0191			0.790326		0.409223
	0.0192			0.791052		0.410355
	0.0193			0.791767		0.411476
	0.0194			0.792471		0.412588
	0.0195			0.793168		0.413689
	0.0196			0.793845		0.414772
	0.0197			0.794512		0.415847
	0.0198			0.795179		0.416924
	0.0199			0.795832		0.418004
	0.02			0.796473		0.419081
	0.0201			0.797105		0.420143
	0.0202			0.797734		0.421201
	0.0203			0.798357		0.422271
	0.0204			0.798977		0.423325
	0.0205			0.79959		0.424355
	0.0206			0.800189		0.425384
	0.0207			0.800783		0.426409
	0.0208			0.801378		0.42744
	0.0209			0.801968		0.428461
	0.021			0.802546		0.429472
	0.0211			0.803119		0.430479
	0.0212			0.803684		0.431489
	0.0213			0.804246		0.432497
	0.0214			0.804798		0.433493
	0.0215			0.805344		0.434484
	0.0216			0.805885		0.435465
	0.0217			0.80642		0.436433
	0.0218			0.806951		0.437398
	0.0219			0.807475		0.438365
	0.022			0.807988		0.439322
	0.0221			0.808495		0.440272
	0.0222			0.808997		0.441227
	0.0223			0.809497		0.442178
	0.0224			0.80999		0.443109
	0.0225			0.810474		0.444043
	0.0226			0.810958		0.444977
	0.0227			0.811438		0.4459
	0.0228			0.811912		0.446811
	0.0229			0.812379		0.447729
	0.023			0.812844		0.448643
	0.0231			0.813301		0.449542
	0.0232			0.813751		0.450433
	0.0233			0.814196		0.451312
	0.0234			0.814639		0.452186
	0.0235			0.815079		0.45307
	0.0236			0.815513		0.453948
	0.0237			0.815941		0.454817
	0.0238			0.816366		0.455674
	0.0239			0.816785		0.456529
	0.024			0.817201		0.457389
	0.0241			0.817616		0.458252
	0.0242			0.818019		0.45911
	0.0243			0.818415		0.459957
	0.0244			0.818811		0.460803
	0.0245			0.819203		0.461652
	0.0246			0.819592		0.462489
	0.0247			0.819978		0.463313
	0.0248			0.820363		0.46412
	0.0249			0.820741		0.464923
	0.025			0.821112		0.465728
	0.0251			0.821475		0.466524
	0.0252			0.821837		0.467313
	0.0253			0.822198		0.4681
	0.0254			0.822554		0.468879
	0.0255			0.822909		0.469659
	0.0256			0.82326		0.470437
	0.0257			0.823606		0.471218
	0.0258			0.82395		0.472002
	0.0259			0.824289		0.472788
	0.026			0.824627		0.473573
	0.0261			0.824958		0.47435
	0.0262			0.825286		0.47513
	0.0263			0.825612		0.475894
	0.0264			0.825937		0.476653
	0.0265			0.826259		0.477416
	0.0266			0.826578		0.478172
	0.0267			0.826893		0.478914
	0.0268			0.827205		0.479662
	0.0269			0.827514		0.480397
	0.027			0.827815		0.481132
	0.0271			0.828115		0.481872
	0.0272			0.828413		0.482605
	0.0273			0.828711		0.483323
	0.0274			0.829005		0.484031
	0.0275			0.829296		0.48474
	0.0276			0.829583		0.485454
	0.0277			0.829868		0.486163
	0.0278			0.830153		0.486867
	0.0279			0.830439		0.487566
	0.028			0.83072		0.488262
	0.0281			0.830997		0.488953
	0.0282			0.831275		0.489639
	0.0283			0.831549		0.490316
	0.0284			0.83182		0.490984
	0.0285			0.832089		0.491646
	0.0286			0.832361		0.492316
	0.0287			0.832628		0.493003
	0.0288			0.83289		0.493672
	0.0289			0.833152		0.494319
	0.029			0.833417		0.494974
	0.0291			0.833679		0.49563
	0.0292			0.833935		0.496295
	0.0293			0.834187		0.496961
	0.0294			0.834439		0.497621
	0.0295			0.834693		0.498278
	0.0296			0.834945		0.498942
	0.0297			0.835189		0.499605
	0.0298			0.835436		0.500257
	0.0299			0.835681		0.500906
	0.03			0.835922		0.501553
	0.0301			0.836161		0.502193
	0.0302			0.836401		0.50283
	0.0303			0.836637		0.50346
	0.0304			0.836871		0.50408
	0.0305			0.837103		0.504707
	0.0306			0.837333		0.505342
	0.0307			0.83756		0.505976
	0.0308			0.83779		0.506605
	0.0309			0.838022		0.507226
	0.031			0.83825		0.507857
	0.0311			0.838473		0.508483
	0.0312			0.838696		0.509115
	0.0313			0.838918		0.509736
	0.0314			0.839138		0.510359
	0.0315			0.839356		0.510991
	0.0316			0.839569		0.511627
	0.0317			0.839784		0.512255
	0.0318			0.839994		0.512883
	0.0319			0.840201		0.513529
	0.032			0.840407		0.514175
	0.0321			0.84061		0.514801
	0.0322			0.840816		0.515428
	0.0323			0.841018		0.516055
	0.0324			0.841217		0.516673
	0.0325			0.841417		0.517288
	0.0326			0.841614		0.517896
	0.0327			0.841815		0.518507
	0.0328			0.842013		0.519119
	0.0329			0.842209		0.519718
	0.033			0.842409		0.520314
	0.0331			0.842608		0.520919
	0.0332			0.842807		0.52152
	0.0333			0.843		0.522121
	0.0334			0.843192		0.522713
	0.0335			0.843388		0.523295
	0.0336			0.843582		0.523882
	0.0337			0.843771		0.524468
	0.0338			0.843958		0.525045
	0.0339			0.844146		0.525618
	0.034			0.844333		0.526193
	0.0341			0.844522		0.526775
	0.0342			0.844709		0.527345
	0.0343			0.844894		0.527909
	0.0344			0.845082		0.528464
	0.0345			0.845269		0.529016
	0.0346			0.845454		0.529573
	0.0347			0.845637		0.530115
	0.0348			0.845818		0.530668
	0.0349			0.845997		0.531234
	0.035			0.846173		0.531789
	0.0351			0.846348		0.532328
	0.0352			0.846524		0.53287
	0.0353			0.846697		0.533413
	0.0354			0.846867		0.533961
	0.0355			0.847042		0.534511
	0.0356			0.847214		0.535054
	0.0357			0.847384		0.53559
	0.0358			0.847553		0.536127
	0.0359			0.847716		0.536674
	0.036			0.84788		0.537211
	0.0361			0.848046		0.537748
	0.0362			0.848212		0.538285
	0.0363			0.848377		0.538819
	0.0364			0.848536		0.539349
	0.0365			0.848693		0.53988
	0.0366			0.848851		0.54042
	0.0367			0.849011		0.540953
	0.0368			0.84917		0.54148
	0.0369			0.849328		0.542006
	0.037			0.849483		0.542526
	0.0371			0.849638		0.543046
	0.0372			0.849788		0.543563
	0.0373			0.849937		0.544088
	0.0374			0.850088		0.544608
	0.0375			0.850239		0.545118
	0.0376			0.850388		0.545632
	0.0377			0.850532		0.546142
	0.0378			0.850674		0.546648
	0.0379			0.850817		0.547152
	0.038			0.850962		0.547647
	0.0381			0.851105		0.548153
	0.0382			0.851246		0.54865
	0.0383			0.851387		0.549143
	0.0384			0.851526		0.549639
	0.0385			0.851666		0.550135
	0.0386			0.851807		0.550633
	0.0387			0.851947		0.551123
	0.0388			0.852084		0.551611
	0.0389			0.85222		0.552099
	0.039			0.852356		0.552591
	0.0391			0.852492		0.553082
	0.0392			0.852626		0.55358
	0.0393			0.852761		0.554063
	0.0394			0.852897		0.554552
	0.0395			0.853033		0.555046
	0.0396			0.853158		0.555517
	0.0397			0.853278		0.555988
	0.0398			0.853403		0.556464
	0.0399			0.85353		0.556944
	0.04			0.853653		0.557419
	0.0401			0.853775		0.557887
	0.0402			0.853895		0.558345
	0.0403			0.854019		0.558813
	0.0404			0.854145		0.559289
	0.0405			0.854269		0.559767
	0.0406			0.854388		0.560248
	0.0407			0.854509		0.560725
	0.0408			0.854633		0.561199
	0.0409			0.854757		0.561669
	0.041			0.854882		0.562133
	0.0411			0.855011		0.562609
	0.0412			0.855135		0.563078
	0.0413			0.855259		0.563539
	0.0414			0.855383		0.564001
	0.0415			0.855508		0.564455
	0.0416			0.855629		0.564903
	0.0417			0.85575		0.565349
	0.0418			0.855872		0.565793
	0.0419			0.855996		0.566232
	0.042			0.856116		0.566674
	0.0421			0.856235		0.56712
	0.0422			0.856352		0.567574
	0.0423			0.856471		0.568027
	0.0424			0.856589		0.568476
	0.0425			0.856708		0.568929
	0.0426			0.856827		0.569374
	0.0427			0.856946		0.569833
	0.0428			0.857065		0.570289
	0.0429			0.857183		0.570732
	0.043			0.857303		0.571173
	0.0431			0.857423		0.571618
	0.0432			0.857544		0.572068
	0.0433			0.857663		0.572519
	0.0434			0.857781		0.572968
	0.0435			0.857899		0.573408
	0.0436			0.858017		0.573851
	0.0437			0.858136		0.574296
	0.0438			0.858254		0.574738
	0.0439			0.858372		0.575182
	0.044			0.85849		0.575627
	0.0441			0.858604		0.576074
	0.0442			0.858715		0.576516
	0.0443			0.858828		0.576947
	0.0444			0.85894		0.577377
	0.0445			0.859047		0.577811
	0.0446			0.859149		0.578223
	0.0447			0.859248		0.578626
	0.0448			0.859352		0.579032
	0.0449			0.859455		0.579439
	0.045			0.859554		0.579846
	0.0451			0.859648		0.580237
	0.0452			0.859744		0.580631
	0.0453			0.85985		0.581027
	0.0454			0.859957		0.58141
	0.0455			0.860053		0.581784
	0.0456			0.86015		0.582164
	0.0457			0.860247		0.582554
	0.0458			0.860352		0.582943
	0.0459			0.860458		0.583331
	0.046			0.860562		0.583721
	0.0461			0.860665		0.584108
	0.0462			0.860772		0.58448
	0.0463			0.860883		0.584842
	0.0464			0.860988		0.585218
	0.0465			0.861093		0.585584
	0.0466			0.861197		0.585943
	0.0467			0.861302		0.586294
	0.0468			0.861407		0.586645
	0.0469			0.86151		0.587
	0.047			0.861614		0.587354
	0.0471			0.861716		0.587716
	0.0472			0.861819		0.588081
	0.0473			0.861927		0.588454
	0.0474			0.862031		0.588822
	0.0475			0.862132		0.589183
	0.0476			0.862232		0.589556
	0.0477			0.862329		0.589935
	0.0478			0.862428		0.59031
	0.0479			0.862526		0.590681
	0.048			0.862626		0.591054
	0.0481			0.862727		0.591431
	0.0482			0.862829		0.591807
	0.0483			0.862928		0.59218
	0.0484			0.863029		0.592553
	0.0485			0.86313		0.592927
	0.0486			0.86323		0.593297
	0.0487			0.86333		0.593665
	0.0488			0.863428		0.594026
	0.0489			0.863527		0.594387
	0.049			0.863626		0.594752
	0.0491			0.863727		0.595102
	0.0492			0.863827		0.595455
	0.0493			0.863925		0.59581
	0.0494			0.86402		0.596169
	0.0495			0.864117		0.596528
	0.0496			0.864214		0.596879
	0.0497			0.864308		0.59723
	0.0498			0.864404		0.597586
	0.0499			0.8645		0.597944
	0.05			0.864597		0.5983
	0.0501			0.864692		0.598648
	0.0502			0.864785		0.598995
	0.0503			0.864879		0.599346
	0.0504			0.864969		0.599685
	0.0505			0.86506		0.600018
	0.0506			0.86515		0.600353
	0.0507			0.865245		0.600695
	0.0508			0.865337		0.601033
	0.0509			0.865426		0.601365
	0.051			0.865515		0.601699
	0.0511			0.865604		0.602032
	0.0512			0.865695		0.602367
	0.0513			0.865785		0.602711
	0.0514			0.865876		0.603054
	0.0515			0.865968		0.603396
	0.0516			0.866058		0.603738
	0.0517			0.866148		0.604072
	0.0518			0.866236		0.604404
	0.0519			0.866322		0.604745
	0.052			0.866407		0.605093
	0.0521			0.866493		0.605448
	0.0522			0.86658		0.605803
	0.0523			0.866666		0.606161
	0.0524			0.866751		0.606516
	0.0525			0.866836		0.606869
	0.0526			0.866918		0.607217
	0.0527			0.867002		0.607571
	0.0528			0.867087		0.607929
	0.0529			0.867173		0.608282
	0.053			0.867256		0.608643
	0.0531			0.867339		0.609023
	0.0532			0.867423		0.609397
	0.0533			0.867506		0.609762
	0.0534			0.867589		0.610124
	0.0535			0.867674		0.61048
	0.0536			0.867758		0.610841
	0.0537			0.867839		0.611195
	0.0538			0.867918		0.61155
	0.0539			0.867999		0.611904
	0.054			0.86808		0.612252
	0.0541			0.868162		0.612596
	0.0542			0.868246		0.612946
	0.0543			0.868331		0.613302
	0.0544			0.868414		0.613654
	0.0545			0.868498		0.613993
	0.0546			0.868581		0.614332
	0.0547			0.868661		0.61468
	0.0548			0.86874		0.615035
	0.0549			0.86882		0.615391
	0.055			0.868903		0.615738
	0.0551			0.868981		0.61608
	0.0552			0.869062		0.616414
	0.0553			0.869142		0.616757
	0.0554			0.869221		0.617095
	0.0555			0.869302		0.617439
	0.0556			0.869383		0.617781
	0.0557			0.869463		0.618128
	0.0558			0.869545		0.61847
	0.0559			0.869629		0.61881
	0.056			0.869709		0.619147
	0.0561			0.86979		0.61949
	0.0562			0.869875		0.619827
	0.0563			0.869956		0.620161
	0.0564			0.870038		0.620488
	0.0565			0.870121		0.620823
	0.0566			0.870199		0.62116
	0.0567			0.870279		0.621499
	0.0568			0.870361		0.621833
	0.0569			0.870443		0.622166
	0.057			0.870523		0.622506
	0.0571			0.870602		0.622847
	0.0572			0.870679		0.623184
	0.0573			0.870754		0.623518
	0.0574			0.870832		0.623844
	0.0575			0.870912		0.624176
	0.0576			0.870992		0.624507
	0.0577			0.87107		0.624847
	0.0578			0.871148		0.625193
	0.0579			0.871226		0.625527
	0.058			0.871303		0.625854
	0.0581			0.871378		0.626174
	0.0582			0.871455		0.626498
	0.0583			0.871531		0.626822
	0.0584			0.871605		0.627145
	0.0585			0.871679		0.627464
	0.0586			0.871755		0.627791
	0.0587			0.871833		0.628117
	0.0588			0.871908		0.628444
	0.0589			0.871981		0.628772
	0.059			0.872052		0.629095
	0.0591			0.872126		0.629416
	0.0592			0.872199		0.62974
	0.0593			0.872271		0.630064
	0.0594			0.872346		0.630386
	0.0595			0.872425		0.63071
	0.0596			0.872502		0.631036
	0.0597			0.872579		0.631369
	0.0598			0.872656		0.631695
	0.0599			0.872734		0.632016
	0.06			0.872809		0.63235
	0.0601			0.872883		0.632684
	0.0602			0.872962		0.633021
	0.0603			0.87304		0.633363
	0.0604			0.873117		0.633696
	0.0605			0.873193		0.634028
	0.0606			0.87327		0.63436
	0.0607			0.873347		0.634696
	0.0608			0.873423		0.635031
	0.0609			0.873499		0.635364
	0.061			0.873571		0.635688
	0.0611			0.873647		0.636015
	0.0612			0.873723		0.636348
	0.0613			0.873799		0.636675
	0.0614			0.873876		0.636995
	0.0615			0.873949		0.637316
	0.0616			0.874022		0.637638
	0.0617			0.874095		0.637952
	0.0618			0.874173		0.638261
	0.0619			0.874248		0.638579
	0.062			0.874323		0.638897
	0.0621			0.874394		0.639209
	0.0622			0.874465		0.639524
	0.0623			0.874536		0.639837
	0.0624			0.874606		0.640156
	0.0625			0.874675		0.640476
	0.0626			0.874747		0.64079
	0.0627			0.874816		0.641109
	0.0628			0.874885		0.641421
	0.0629			0.874957		0.641732
	0.063			0.875027		0.642045
	0.0631			0.875095		0.642357
	0.0632			0.875167		0.642667
	0.0633			0.875239		0.642975
	0.0634			0.875309		0.643283
	0.0635			0.875374		0.643595
	0.0636			0.875444		0.643901
	0.0637			0.875516		0.644208
	0.0638			0.875588		0.644505
	0.0639			0.875658		0.644808
	0.064			0.875726		0.645104
	0.0641			0.875793		0.645399
	0.0642			0.875861		0.645691
	0.0643			0.875927		0.645981
	0.0644			0.875995		0.646276
	0.0645			0.876058		0.646556
	0.0646			0.876116		0.646825
	0.0647			0.876178		0.647103
	0.0648			0.87624		0.647377
	0.0649			0.876301		0.647651
	0.065			0.876361		0.647925
	0.0651			0.876417		0.648182
	0.0652			0.876473		0.648444
	0.0653			0.876533		0.648727
	0.0654			0.876595		0.649014
	0.0655			0.876655		0.649297
	0.0656			0.876715		0.649586
	0.0657			0.876776		0.649887
	0.0658			0.876837		0.650182
	0.0659			0.876901		0.650481
	0.066			0.876962		0.650777
	0.0661			0.877023		0.651081
	0.0662			0.877083		0.651385
	0.0663			0.877145		0.651684
	0.0664			0.877209		0.651978
	0.0665			0.877275		0.652267
	0.0666			0.877341		0.652554
	0.0667			0.877406		0.652848
	0.0668			0.877471		0.653143
	0.0669			0.877537		0.653451
	0.067			0.877602		0.653761
	0.0671			0.877666		0.654061
	0.0672			0.877729		0.654355
	0.0673			0.877793		0.654662
	0.0674			0.877857		0.654975
	0.0675			0.877924		0.655285
	0.0676			0.877994		0.655586
	0.0677			0.87806		0.655882
	0.0678			0.878127		0.656176
	0.0679			0.878194		0.656469
	0.068			0.878261		0.656758
	0.0681			0.87833		0.657044
	0.0682			0.878404		0.657336
	0.0683			0.878472		0.657623
	0.0684			0.878539		0.657916
	0.0685			0.878606		0.658216
	0.0686			0.878676		0.658517
	0.0687			0.878746		0.658812
	0.0688			0.878816		0.659093
	0.0689			0.878884		0.659376
	0.069			0.878952		0.659658
	0.0691			0.879021		0.659934
	0.0692			0.87909		0.660202
	0.0693			0.879155		0.660476
	0.0694			0.879218		0.66075
	0.0695			0.879279		0.661002
	0.0696			0.879336		0.661254
	0.0697			0.879395		0.66151
	0.0698			0.879452		0.661772
	0.0699			0.879511		0.662029
	0.07			0.879567		0.66227
	0.0701			0.879619		0.662511
	0.0702			0.879678		0.662766
	0.0703			0.879743		0.663029
	0.0704			0.879807		0.663286
	0.0705			0.879868		0.663538
	0.0706			0.879934		0.663788
	0.0707			0.880004		0.664041
	0.0708			0.880077		0.664303
	0.0709			0.880148		0.664569
	0.071			0.88022		0.664837
	0.0711			0.880292		0.665099
	0.0712			0.880363		0.665365
	0.0713			0.880434		0.665627
	0.0714			0.880504		0.665883
	0.0715			0.880573		0.666148
	0.0716			0.880645		0.666424
	0.0717			0.880718		0.666691
	0.0718			0.880791		0.666956
	0.0719			0.880861		0.667209
	0.072			0.88093		0.667473
	0.0721			0.881001		0.667744
	0.0722			0.881072		0.668005
	0.0723			0.881143		0.668266
	0.0724			0.881213		0.668524
	0.0725			0.881281		0.668787
	0.0726			0.881346		0.669056
	0.0727			0.881412		0.669321
	0.0728			0.881482		0.669574
	0.0729			0.881552		0.669836
	0.073			0.881619		0.670095
	0.0731			0.881685		0.670347
	0.0732			0.881749		0.670605
	0.0733			0.881816		0.670868
	0.0734			0.88188		0.671131
	0.0735			0.881949		0.671382
	0.0736			0.882017		0.67163
	0.0737			0.882081		0.671876
	0.0738			0.882148		0.672123
	0.0739			0.882215		0.672361
	0.074			0.88228		0.672604
	0.0741			0.882344		0.672847
	0.0742			0.882409		0.673091
	0.0743			0.882476		0.673337
	0.0744			0.882541		0.673577
	0.0745			0.882607		0.673819
	0.0746			0.882673		0.674064
	0.0747			0.88274		0.674302
	0.0748			0.882808		0.67454
	0.0749			0.882875		0.674775
	0.075			0.882937		0.675009
	0.0751			0.882998		0.675245
	0.0752			0.883062		0.675476
	0.0753			0.883125		0.675697
	0.0754			0.883188		0.675921
	0.0755			0.88325		0.676146
	0.0756			0.88331		0.676375
	0.0757			0.883373		0.676605
	0.0758			0.883434		0.676837
	0.0759			0.883493		0.677077
	0.076			0.883557		0.677315
	0.0761			0.883621		0.677551
	0.0762			0.883683		0.677789
	0.0763			0.883745		0.678019
	0.0764			0.883808		0.678252
	0.0765			0.883873		0.67848
	0.0766			0.88394		0.67871
	0.0767			0.884004		0.678948
	0.0768			0.884068		0.679181
	0.0769			0.884135		0.679416
	0.077			0.884202		0.679656
	0.0771			0.884265		0.679895
	0.0772			0.88433		0.680138
	0.0773			0.884395		0.680389
	0.0774			0.88446		0.680645
	0.0775			0.884522		0.680891
	0.0776			0.884587		0.681123
	0.0777			0.884649		0.681359
	0.0778			0.884709		0.681598
	0.0779			0.884772		0.681831
	0.078			0.884835		0.682066
	0.0781			0.884897		0.682301
	0.0782			0.884958		0.682541
	0.0783			0.88502		0.682764
	0.0784			0.885083		0.682988
	0.0785			0.885144		0.683219
	0.0786			0.885205		0.683458
	0.0787			0.885269		0.683691
	0.0788			0.885332		0.68392
	0.0789			0.885393		0.684149
	0.079			0.885451		0.684384
	0.0791			0.885511		0.684621
	0.0792			0.885572		0.684856
	0.0793			0.885635		0.685082
	0.0794			0.885697		0.685306
	0.0795			0.885758		0.685543
	0.0796			0.885821		0.685774
	0.0797			0.885878		0.68601
	0.0798			0.885934		0.686233
	0.0799			0.885989		0.686466
	0.08			0.886045		0.686701
	0.0801			0.886103		0.686935
	0.0802			0.886161		0.68716
	0.0803			0.886222		0.687387
	0.0804			0.886285		0.687626
	0.0805			0.886346		0.687863
	0.0806			0.886406		0.688086
	0.0807			0.886466		0.688308
	0.0808			0.886526		0.688543
	0.0809			0.886586		0.68878
	0.081			0.88665		0.689015
	0.0811			0.886713		0.689257
	0.0812			0.886773		0.689496
	0.0813			0.886833		0.689739
	0.0814			0.886895		0.689994
	0.0815			0.886956		0.690237
	0.0816			0.887019		0.690477
	0.0817			0.887084		0.690724
	0.0818			0.887149		0.690961
	0.0819			0.887212		0.691193
	0.082			0.887276		0.691421
	0.0821			0.887334		0.691662
	0.0822			0.887395		0.691897
	0.0823			0.887459		0.692134
	0.0824			0.887521		0.692376
	0.0825			0.887586		0.692611
	0.0826			0.887652		0.692846
	0.0827			0.887718		0.693069
	0.0828			0.88778		0.693289
	0.0829			0.887839		0.693516
	0.083			0.8879		0.693752
	0.0831			0.887964		0.693992
	0.0832			0.888029		0.69422
	0.0833			0.888089		0.694445
	0.0834			0.888151		0.694665
	0.0835			0.888214		0.694886
	0.0836			0.888277		0.695112
	0.0837			0.888342		0.695343
	0.0838			0.888406		0.695577
	0.0839			0.888469		0.695808
	0.084			0.888531		0.696039
	0.0841			0.888592		0.69628
	0.0842			0.888654		0.696499
	0.0843			0.888716		0.696715
	0.0844			0.88878		0.696943
	0.0845			0.888841		0.697171
	0.0846			0.888902		0.697397
	0.0847			0.888966		0.697614
	0.0848			0.88903		0.697826
	0.0849			0.889093		0.698048
	0.085			0.889157		0.698276
	0.0851			0.889217		0.698507
	0.0852			0.889278		0.698721
	0.0853			0.889341		0.69895
	0.0854			0.889408		0.699186
	0.0855			0.889475		0.699411
	0.0856			0.889537		0.69963
	0.0857			0.889599		0.699849
	0.0858			0.88966		0.70007
	0.0859			0.889721		0.700294
	0.086			0.889783		0.700521
	0.0861			0.889844		0.700745
	0.0862			0.889903		0.700969
	0.0863			0.889963		0.701185
	0.0864			0.890022		0.701401
	0.0865			0.890082		0.701621
	0.0866			0.890142		0.701831
	0.0867			0.8902		0.702044
	0.0868			0.890258		0.702259
	0.0869			0.890316		0.70248
	0.087			0.890373		0.702688
	0.0871			0.890431		0.702892
	0.0872			0.89049		0.703092
	0.0873			0.890548		0.703308
	0.0874			0.890604		0.703524
	0.0875			0.89066		0.703738
	0.0876			0.890718		0.703958
	0.0877			0.890777		0.704177
	0.0878			0.890831		0.704388
	0.0879			0.890886		0.704592
	0.088			0.890944		0.70479
	0.0881			0.891003		0.705
	0.0882			0.891059		0.705208
	0.0883			0.891116		0.705416
	0.0884			0.891174		0.705632
	0.0885			0.891232		0.705842
	0.0886			0.891288		0.706054
	0.0887			0.891345		0.706268
	0.0888			0.891403		0.706482
	0.0889			0.89146		0.706697
	0.089			0.891516		0.706906
	0.0891			0.891575		0.707118
	0.0892			0.89163		0.707332
	0.0893			0.891684		0.707556
	0.0894			0.891737		0.707781
	0.0895			0.891783		0.707985
	0.0896			0.891827		0.708186
	0.0897			0.891876		0.708391
	0.0898			0.891928		0.708601
	0.0899			0.891979		0.708813
	0.09			0.892024		0.709013
	0.0901			0.892061		0.709202
	0.0902			0.892102		0.709408
	0.0903			0.89215		0.709622
	0.0904			0.892199		0.709827
	0.0905			0.892246		0.710028
	0.0906			0.89229		0.710233
	0.0907			0.892337		0.710437
	0.0908			0.892389		0.710654
	0.0909			0.892443		0.710882
	0.091			0.892493		0.711109
	0.0911			0.892544		0.711325
	0.0912			0.892597		0.711542
	0.0913			0.892655		0.711748
	0.0914			0.892711		0.711942
	0.0915			0.892763		0.712147
	0.0916			0.892817		0.712355
	0.0917			0.892873		0.71256
	0.0918			0.892928		0.712754
	0.0919			0.892981		0.712952
	0.092			0.893032		0.713157
	0.0921			0.893085		0.713364
	0.0922			0.893139		0.713575
	0.0923			0.893192		0.713786
	0.0924			0.893245		0.713998
	0.0925			0.893295		0.714211
	0.0926			0.893346		0.714431
	0.0927			0.893398		0.714651
	0.0928			0.893452		0.714869
	0.0929			0.893508		0.715083
	0.093			0.89356		0.7153
	0.0931			0.893616		0.715518
	0.0932			0.893673		0.715726
	0.0933			0.893728		0.71594
	0.0934			0.893785		0.716156
	0.0935			0.893843		0.716373
	0.0936			0.893901		0.716592
	0.0937			0.893956		0.71681
	0.0938			0.894011		0.717037
	0.0939			0.894067		0.717266
	0.094			0.894123		0.717501
	0.0941			0.894177		0.717725
	0.0942			0.894231		0.717941
	0.0943			0.894286		0.718173
	0.0944			0.894338		0.718401
	0.0945			0.894381		0.718606
	0.0946			0.894425		0.718802
	0.0947			0.894474		0.718989
	0.0948			0.894524		0.719182
	0.0949			0.894572		0.719376
	0.095			0.894616		0.719564
	0.0951			0.894661		0.719757
	0.0952			0.894713		0.719955
	0.0953			0.894768		0.720148
	0.0954			0.894819		0.720322
	0.0955			0.894866		0.720496
	0.0956			0.894913		0.720673
	0.0957			0.894968		0.720859
	0.0958			0.895027		0.721059
	0.0959			0.89509		0.72126
	0.096			0.895149		0.721447
	0.0961			0.895205		0.721628
	0.0962			0.895258		0.721793
	0.0963			0.895311		0.721962
	0.0964			0.895367		0.722138
	0.0965			0.895421		0.722312
	0.0966			0.895477		0.722478
	0.0967			0.89553		0.722653
	0.0968			0.895584		0.722828
	0.0969			0.895637		0.723001
	0.097			0.895691		0.723165
	0.0971			0.895745		0.72332
	0.0972			0.8958		0.72348
	0.0973			0.895852		0.723644
	0.0974			0.895907		0.723813
	0.0975			0.895961		0.723977
	0.0976			0.896014		0.724147
	0.0977			0.896069		0.724321
	0.0978			0.896124		0.724495
	0.0979			0.896178		0.724671
	0.098			0.896231		0.724844
	0.0981			0.896284		0.725023
	0.0982			0.896337		0.725205
	0.0983			0.896395		0.72539
	0.0984			0.896451		0.725576
	0.0985			0.896504		0.725742
	0.0986			0.896558		0.725908
	0.0987			0.896613		0.72609
	0.0988			0.896668		0.726269
	0.0989			0.896721		0.726455
	0.099			0.896769		0.726636
	0.0991			0.896819		0.726816
	0.0992			0.896871		0.726986
	0.0993			0.896924		0.727153
	0.0994			0.896976		0.727322
	0.0995			0.89703		0.72749
	0.0996			0.897084		0.727668
	0.0997			0.897137		0.727845
	0.0998			0.89719		0.728015
	0.0999			0.897242		0.728183
	0.1			0.897296		0.728359
	0.1001			0.897348		0.72853
	0.1002			0.897401		0.728698
	0.1003			0.897456		0.728866
	0.1004			0.897508		0.729033
	0.1005			0.897557		0.729206
	0.1006			0.897608		0.729391
	0.1007			0.897657		0.729561
	0.1008			0.897708		0.729714
	0.1009			0.897756		0.729862
	0.101			0.897804		0.730012
	0.1011			0.897854		0.730166
	0.1012			0.897903		0.730321
	0.1013			0.89795		0.730479
	0.1014			0.897997		0.730642
	0.1015			0.898046		0.730797
	0.1016			0.898094		0.730953
	0.1017			0.898139		0.731105
	0.1018			0.898187		0.731259
	0.1019			0.898233		0.731414
	0.102			0.898277		0.731572
	0.1021			0.898319		0.731735
	0.1022			0.898363		0.731896
	0.1023			0.898408		0.732052
	0.1024			0.898448		0.732211
	0.1025			0.898494		0.732364
	0.1026			0.89854		0.732519
	0.1027			0.898583		0.732683
	0.1028			0.898627		0.73285
	0.1029			0.898669		0.73302
	0.103			0.898712		0.733186
	0.1031			0.898757		0.733346
	0.1032			0.898805		0.733506
	0.1033			0.89885		0.733668
	0.1034			0.89889		0.733829
	0.1035			0.898929		0.733991
	0.1036			0.898972		0.734166
	0.1037			0.899018		0.734335
	0.1038			0.899061		0.734502
	0.1039			0.899101		0.734675
	0.104			0.899139		0.734853
	0.1041			0.899181		0.735033
	0.1042			0.899221		0.735215
	0.1043			0.899261		0.7354
	0.1044			0.8993		0.735573
	0.1045			0.899335		0.735747
	0.1046			0.899373		0.735923
	0.1047			0.899415		0.736096
	0.1048			0.899459		0.736271
	0.1049			0.8995		0.736447
	0.105			0.899539		0.736625
	0.1051			0.899579		0.736801
	0.1052			0.899621		0.736984
	0.1053			0.899657		0.737167
	0.1054			0.899696		0.737344
	0.1055			0.899737		0.737528
	0.1056			0.899777		0.737705
	0.1057			0.899812		0.737877
	0.1058			0.89985		0.738053
	0.1059			0.899889		0.738228
	0.106			0.899925		0.738405
	0.1061			0.89996		0.738584
	0.1062			0.899998		0.738766
	0.1063			0.900036		0.738946
	0.1064			0.900074		0.739133
	0.1065			0.900113		0.73931
	0.1066			0.900154		0.739476
	0.1067			0.900192		0.739642
	0.1068			0.900231		0.739809
	0.1069			0.90027		0.739976
	0.107			0.900305		0.740134
	0.1071			0.900342		0.740295
	0.1072			0.900381		0.740464
	0.1073			0.900422		0.740628
	0.1074			0.900462		0.740786
	0.1075			0.900502		0.740939
	0.1076			0.900544		0.741093
	0.1077			0.900588		0.741254
	0.1078			0.900629		0.741406
	0.1079			0.900667		0.741561
	0.108			0.900707		0.741712
	0.1081			0.90075		0.741871
	0.1082			0.900795		0.742031
	0.1083			0.900836		0.742194
	0.1084			0.900876		0.742351
	0.1085			0.900921		0.742507
	0.1086			0.900965		0.742664
	0.1087			0.90101		0.742823
	0.1088			0.901052		0.742982
	0.1089			0.901093		0.74314
	0.109			0.901134		0.743298
	0.1091			0.901177		0.743463
	0.1092			0.901222		0.743628
	0.1093			0.90127		0.743799
	0.1094			0.901317		0.743963
	0.1095			0.901364		0.744118
	0.1096			0.901411		0.744285
	0.1097			0.901456		0.744442
	0.1098			0.901504		0.744598
	0.1099			0.901551		0.744749
	0.11			0.901596		0.744901
	0.1101			0.901643		0.745057
	0.1102			0.90169		0.745203
	0.1103			0.901737		0.74536
	0.1104			0.901783		0.745514
	0.1105			0.901828		0.745677
	0.1106			0.901875		0.745851
	0.1107			0.90192		0.746025
	0.1108			0.901967		0.74619
	0.1109			0.902018		0.746359
	0.111			0.902066		0.746524
	0.1111			0.902114		0.746685
	0.1112			0.902161		0.746849
	0.1113			0.902208		0.746999
	0.1114			0.902254		0.747156
	0.1115			0.902299		0.747314
	0.1116			0.902343		0.747478
	0.1117			0.902391		0.747646
	0.1118			0.902441		0.747798
	0.1119			0.90249		0.747947
	0.112			0.902539		0.748103
	0.1121			0.902589		0.748257
	0.1122			0.902635		0.748406
	0.1123			0.902682		0.748562
	0.1124			0.90273		0.748724
	0.1125			0.902775		0.748882
	0.1126			0.902823		0.749032
	0.1127			0.902872		0.749191
	0.1128			0.902922		0.749356
	0.1129			0.902971		0.749534
	0.113			0.903021		0.749702
	0.1131			0.90307		0.749858
	0.1132			0.903122		0.750018
	0.1133			0.903172		0.750176
	0.1134			0.903223		0.750334
	0.1135			0.903275		0.7505
	0.1136			0.903325		0.750663
	0.1137			0.903377		0.750832
	0.1138			0.903429		0.750992
	0.1139			0.903479		0.751147
	0.114			0.90353		0.751307
	0.1141			0.903584		0.75147
	0.1142			0.903633		0.751626
	0.1143			0.903683		0.751784
	0.1144			0.903731		0.751926
	0.1145			0.903769		0.752054
	0.1146			0.903807		0.75219
	0.1147			0.903851		0.752336
	0.1148			0.903899		0.75249
	0.1149			0.903945		0.752634
	0.115			0.903988		0.752768
	0.1151			0.904027		0.752899
	0.1152			0.904069		0.753042
	0.1153			0.904114		0.753199
	0.1154			0.904158		0.753354
	0.1155			0.904204		0.753507
	0.1156			0.904252		0.753671
	0.1157			0.904304		0.753815
	0.1158			0.904352		0.753966
	0.1159			0.904399		0.754131
	0.116			0.904446		0.754289
	0.1161			0.904492		0.754452
	0.1162			0.904541		0.754622
	0.1163			0.90459		0.754794
	0.1164			0.904636		0.754965
	0.1165			0.904683		0.755138
	0.1166			0.904732		0.755307
	0.1167			0.904781		0.755475
	0.1168			0.904829		0.755645
	0.1169			0.904878		0.755811
	0.117			0.904927		0.755973
	0.1171			0.904979		0.756145
	0.1172			0.905025		0.756318
	0.1173			0.905071		0.75649
	0.1174			0.905119		0.756662
	0.1175			0.905165		0.756827
	0.1176			0.905211		0.756984
	0.1177			0.905258		0.757153
	0.1178			0.905305		0.757313
	0.1179			0.905355		0.757483
	0.118			0.905404		0.757661
	0.1181			0.905452		0.757838
	0.1182			0.9055		0.758005
	0.1183			0.905548		0.758174
	0.1184			0.905595		0.758346
	0.1185			0.905641		0.758511
	0.1186			0.905687		0.758672
	0.1187			0.905732		0.75884
	0.1188			0.90578		0.759012
	0.1189			0.905827		0.759182
	0.119			0.905875		0.759347
	0.1191			0.905922		0.759514
	0.1192			0.905965		0.759688
	0.1193			0.906013		0.759866
	0.1194			0.906058		0.760035
	0.1195			0.906096		0.760188
	0.1196			0.906135		0.760345
	0.1197			0.906178		0.760505
	0.1198			0.906218		0.760667
	0.1199			0.906258		0.760811
	0.12			0.906295		0.760949
	0.1201			0.906334		0.761088
	0.1202			0.906378		0.761234
	0.1203			0.906419		0.761374
	0.1204			0.906457		0.761502
	0.1205			0.906495		0.76164
	0.1206			0.906539		0.761777
	0.1207			0.906585		0.761922
	0.1208			0.90663		0.762071
	0.1209			0.906675		0.762217
	0.121			0.906722		0.76236
	0.1211			0.906767		0.762501
	0.1212			0.90681		0.762664
	0.1213			0.906853		0.76283
	0.1214			0.906898		0.762993
	0.1215			0.906943		0.763155
	0.1216			0.906987		0.763314
	0.1217			0.907032		0.763475
	0.1218			0.907081		0.763632
	0.1219			0.907128		0.763788
	0.122			0.907173		0.763943
	0.1221			0.907216		0.764107
	0.1222			0.90726		0.764277
	0.1223			0.907302		0.764433
	0.1224			0.907342		0.764585
	0.1225			0.907384		0.764745
	0.1226			0.90743		0.764909
	0.1227			0.907475		0.765066
	0.1228			0.907518		0.765211
	0.1229			0.907562		0.765356
	0.123			0.907609		0.765521
	0.1231			0.907654		0.765677
	0.1232			0.9077		0.765832
	0.1233			0.907747		0.765988
	0.1234			0.907792		0.76613
	0.1235			0.907838		0.766275
	0.1236			0.907887		0.766428
	0.1237			0.907936		0.766572
	0.1238			0.907985		0.766718
	0.1239			0.908033		0.766863
	0.124			0.908078		0.767012
	0.1241			0.908123		0.767155
	0.1242			0.908169		0.76729
	0.1243			0.908211		0.767432
	0.1244			0.908253		0.76757
	0.1245			0.9083		0.767723
	0.1246			0.908345		0.767876
	0.1247			0.908388		0.768026
	0.1248			0.908431		0.768177
	0.1249			0.908471		0.76833
	0.125			0.908514		0.768479
	0.1251			0.908557		0.768622
	0.1252			0.908604		0.768768
	0.1253			0.90865		0.768917
	0.1254			0.908696		0.769065
	0.1255			0.908738		0.769202
	0.1256			0.90878		0.76934
	0.1257			0.908826		0.769482
	0.1258			0.908872		0.769626
	0.1259			0.908918		0.769783
	0.126			0.908965		0.769936
	0.1261			0.909007		0.770078
	0.1262			0.909051		0.770229
	0.1263			0.909096		0.770381
	0.1264			0.909143		0.770536
	0.1265			0.909189		0.770694
	0.1266			0.909234		0.770854
	0.1267			0.909278		0.771005
	0.1268			0.909321		0.771169
	0.1269			0.909365		0.771339
	0.127			0.909411		0.7715
	0.1271			0.909459		0.771656
	0.1272			0.909506		0.771817
	0.1273			0.909551		0.771977
	0.1274			0.909593		0.772123
	0.1275			0.909635		0.77227
	0.1276			0.909681		0.772428
	0.1277			0.909725		0.77258
	0.1278			0.909768		0.772722
	0.1279			0.909813		0.772868
	0.128			0.909853		0.77302
	0.1281			0.909897		0.773173
	0.1282			0.909939		0.773332
	0.1283			0.909979		0.773501
	0.1284			0.91002		0.773667
	0.1285			0.91006		0.773826
	0.1286			0.910101		0.773989
	0.1287			0.910142		0.774141
	0.1288			0.910181		0.774297
	0.1289			0.91022		0.774447
	0.129			0.910262		0.774592
	0.1291			0.910303		0.774739
	0.1292			0.910343		0.774884
	0.1293			0.910382		0.775032
	0.1294			0.910423		0.775184
	0.1295			0.910464		0.775334
	0.1296			0.910505		0.775485
	0.1297			0.910546		0.775625
	0.1298			0.910587		0.775761
	0.1299			0.910629		0.775905
	0.13			0.910674		0.776047
	0.1301			0.910715		0.776188
	0.1302			0.91076		0.776333
	0.1303			0.910807		0.77648
	0.1304			0.910855		0.776633
	0.1305			0.910902		0.776787
	0.1306			0.910948		0.776926
	0.1307			0.910993		0.777063
	0.1308			0.911037		0.777214
	0.1309			0.911079		0.777358
	0.131			0.911119		0.777497
	0.1311			0.911165		0.777639
	0.1312			0.911217		0.777774
	0.1313			0.911265		0.777913
	0.1314			0.91131		0.778041
	0.1315			0.911356		0.778168
	0.1316			0.911402		0.778305
	0.1317			0.91145		0.778448
	0.1318			0.911496		0.778588
	0.1319			0.911539		0.778726
	0.132			0.911586		0.778861
	0.1321			0.911634		0.779004
	0.1322			0.911683		0.779149
	0.1323			0.911729		0.779297
	0.1324			0.911777		0.779443
	0.1325			0.911822		0.779589
	0.1326			0.911865		0.779734
	0.1327			0.911911		0.779872
	0.1328			0.911957		0.780007
	0.1329			0.911999		0.780157
	0.133			0.912044		0.780307
	0.1331			0.912089		0.780453
	0.1332			0.912135		0.780589
	0.1333			0.912181		0.780748
	0.1334			0.912225		0.780899
	0.1335			0.91227		0.78105
	0.1336			0.912315		0.781202
	0.1337			0.912361		0.781351
	0.1338			0.912408		0.781487
	0.1339			0.912456		0.781624
	0.134			0.912503		0.781767
	0.1341			0.912548		0.781911
	0.1342			0.912595		0.782056
	0.1343			0.912642		0.782201
	0.1344			0.912689		0.782341
	0.1345			0.912735		0.782479
	0.1346			0.912779		0.782619
	0.1347			0.912826		0.782753
	0.1348			0.912871		0.782884
	0.1349			0.912916		0.783016
	0.135			0.912959		0.783153
	0.1351			0.913001		0.783284
	0.1352			0.913043		0.78342
	0.1353			0.913085		0.783555
	0.1354			0.913125		0.783691
	0.1355			0.913169		0.783831
	0.1356			0.913212		0.78397
	0.1357			0.913254		0.784112
	0.1358			0.913296		0.784252
	0.1359			0.91334		0.784396
	0.136			0.913383		0.784545
	0.1361			0.913426		0.784678
	0.1362			0.913467		0.784824
	0.1363			0.913509		0.78498
	0.1364			0.913554		0.785123
	0.1365			0.913602		0.785266
	0.1366			0.91364		0.785415
	0.1367			0.913678		0.78556
	0.1368			0.913716		0.785694
	0.1369			0.91376		0.785825
	0.137			0.913801		0.785952
	0.1371			0.913842		0.786076
	0.1372			0.913883		0.786203
	0.1373			0.913926		0.786332
	0.1374			0.913969		0.786463
	0.1375			0.914009		0.786593
	0.1376			0.91405		0.78672
	0.1377			0.914089		0.786848
	0.1378			0.914128		0.786975
	0.1379			0.914165		0.787093
	0.138			0.914209		0.787214
	0.1381			0.914253		0.78734
	0.1382			0.914292		0.787466
	0.1383			0.91433		0.787597
	0.1384			0.914367		0.787721
	0.1385			0.914402		0.787836
	0.1386			0.914441		0.787959
	0.1387			0.914479		0.788084
	0.1388			0.914518		0.78821
	0.1389			0.914555		0.78833
	0.139			0.914593		0.788441
	0.1391			0.914632		0.788555
	0.1392			0.914667		0.78868
	0.1393			0.914707		0.788801
	0.1394			0.914737		0.788911
	0.1395			0.914763		0.789019
	0.1396			0.914794		0.789128
	0.1397			0.914826		0.789237
	0.1398			0.914858		0.789342
	0.1399			0.914888		0.789447
	0.14			0.914913		0.789544
	0.1401			0.914943		0.789643
	0.1402			0.914977		0.789742
	0.1403			0.915013		0.789857
	0.1404			0.915045		0.789964
	0.1405			0.915078		0.790067
	0.1406			0.915113		0.790173
	0.1407			0.915148		0.790282
	0.1408			0.915186		0.79039
	0.1409			0.915225		0.790498
	0.141			0.915264		0.790605
	0.1411			0.915302		0.790706
	0.1412			0.915341		0.790805
	0.1413			0.915378		0.790908
	0.1414			0.915418		0.791007
	0.1415			0.915455		0.791111
	0.1416			0.915495		0.791216
	0.1417			0.915537		0.791326
	0.1418			0.915578		0.791427
	0.1419			0.915621		0.79152
	0.142			0.91566		0.791608
	0.1421			0.915698		0.791703
	0.1422			0.915738		0.791805
	0.1423			0.915779		0.791908
	0.1424			0.915819		0.792019
	0.1425			0.915857		0.792131
	0.1426			0.915896		0.792245
	0.1427			0.915937		0.792368
	0.1428			0.915975		0.792484
	0.1429			0.916012		0.792599
	0.143			0.916051		0.792726
	0.1431			0.91609		0.792855
	0.1432			0.916126		0.792983
	0.1433			0.916163		0.793111
	0.1434			0.916201		0.793241
	0.1435			0.916242		0.793368
	0.1436			0.916283		0.793496
	0.1437			0.91632		0.793619
	0.1438			0.916358		0.793743
	0.1439			0.916399		0.793857
	0.144			0.91644		0.793971
	0.1441			0.916479		0.794094
	0.1442			0.916513		0.794217
	0.1443			0.916551		0.794352
	0.1444			0.916585		0.794467
	0.1445			0.916614		0.794567
	0.1446			0.916648		0.794677
	0.1447			0.916685		0.794796
	0.1448			0.916719		0.794914
	0.1449			0.916749		0.79503
	0.145			0.916774		0.795131
	0.1451			0.916804		0.795242
	0.1452			0.916841		0.795364
	0.1453			0.916876		0.795487
	0.1454			0.916908		0.795595
	0.1455			0.916941		0.795709
	0.1456			0.916975		0.795835
	0.1457			0.917009		0.795969
	0.1458			0.917049		0.7961
	0.1459			0.917093		0.796238
	0.146			0.917131		0.79637
	0.1461			0.917168		0.796495
	0.1462			0.917207		0.796623
	0.1463			0.917245		0.796756
	0.1464			0.917285		0.796887
	0.1465			0.917325		0.797026
	0.1466			0.917366		0.797158
	0.1467			0.917407		0.797299
	0.1468			0.917444		0.797437
	0.1469			0.917482		0.797572
	0.147			0.91752		0.797707
	0.1471			0.917557		0.79784
	0.1472			0.917596		0.797973
	0.1473			0.917636		0.798098
	0.1474			0.91768		0.798215
	0.1475			0.917722		0.798339
	0.1476			0.91776		0.798463
	0.1477			0.917797		0.798585
	0.1478			0.917834		0.798704
	0.1479			0.917871		0.798823
	0.148			0.91791		0.79894
	0.1481			0.917948		0.799053
	0.1482			0.917986		0.799179
	0.1483			0.918025		0.799312
	0.1484			0.918068		0.799435
	0.1485			0.918109		0.799548
	0.1486			0.918146		0.799661
	0.1487			0.918184		0.799777
	0.1488			0.918222		0.799902
	0.1489			0.918261		0.800026
	0.149			0.918304		0.800141
	0.1491			0.918343		0.800252
	0.1492			0.918384		0.80037
	0.1493			0.918422		0.800489
	0.1494			0.918463		0.800599
	0.1495			0.918506		0.800718
	0.1496			0.918547		0.80084
	0.1497			0.918586		0.800966
	0.1498			0.918627		0.801088
	0.1499			0.918669		0.801201
	0.15			0.918708		0.801322
	0.1501			0.918746		0.801444
	0.1502			0.918784		0.801563
	0.1503			0.918822		0.801677
	0.1504			0.91886		0.801798
	0.1505			0.918897		0.801916
	0.1506			0.918933		0.802038
	0.1507			0.91897		0.802157
	0.1508			0.919008		0.802275
	0.1509			0.919043		0.80239
	0.151			0.91908		0.802511
	0.1511			0.91912		0.80263
	0.1512			0.919157		0.802742
	0.1513			0.919192		0.802856
	0.1514			0.919228		0.802975
	0.1515			0.919263		0.8031
	0.1516			0.919297		0.803218
	0.1517			0.919331		0.803324
	0.1518			0.919364		0.803434
	0.1519			0.919396		0.803543
	0.152			0.919428		0.803653
	0.1521			0.919462		0.803763
	0.1522			0.919497		0.80387
	0.1523			0.91953		0.803981
	0.1524			0.919563		0.804082
	0.1525			0.919598		0.80418
	0.1526			0.919627		0.804283
	0.1527			0.919657		0.804388
	0.1528			0.919691		0.804502
	0.1529			0.919724		0.804624
	0.153			0.919754		0.804726
	0.1531			0.919782		0.804836
	0.1532			0.91981		0.804944
	0.1533			0.919842		0.805049
	0.1534			0.919878		0.805147
	0.1535			0.91991		0.805242
	0.1536			0.91994		0.805339
	0.1537			0.919971		0.805439
	0.1538			0.920003		0.80554
	0.1539			0.920034		0.805648
	0.154			0.920068		0.80576
	0.1541			0.920104		0.805869
	0.1542			0.920139		0.805976
	0.1543			0.920171		0.806076
	0.1544			0.920204		0.806179
	0.1545			0.920237		0.806283
	0.1546			0.920271		0.806385
	0.1547			0.920304		0.806483
	0.1548			0.920338		0.806576
	0.1549			0.920373		0.806675
	0.155			0.920407		0.806791
	0.1551			0.920438		0.806901
	0.1552			0.920468		0.807012
	0.1553			0.920499		0.807124
	0.1554			0.920528		0.807231
	0.1555			0.920555		0.807346
	0.1556			0.920585		0.807469
	0.1557			0.920618		0.807589
	0.1558			0.920649		0.807698
	0.1559			0.92068		0.807812
	0.156			0.920713		0.807932
	0.1561			0.920745		0.808044
	0.1562			0.920777		0.808159
	0.1563			0.920809		0.808269
	0.1564			0.920839		0.808367
	0.1565			0.92087		0.80847
	0.1566			0.920899		0.808588
	0.1567			0.920929		0.808709
	0.1568			0.920957		0.80882
	0.1569			0.920986		0.808925
	0.157			0.921017		0.809039
	0.1571			0.921045		0.809148
	0.1572			0.921071		0.809266
	0.1573			0.9211		0.809384
	0.1574			0.921129		0.809503
	0.1575			0.921157		0.809627
	0.1576			0.921184		0.80974
	0.1577			0.921208		0.809857
	0.1578			0.921233		0.809983
	0.1579			0.921258		0.810111
	0.158			0.921286		0.81024
	0.1581			0.921313		0.81037
	0.1582			0.921342		0.810499
	0.1583			0.921371		0.810616
	0.1584			0.921399		0.810738
	0.1585			0.921428		0.810857
	0.1586			0.921458		0.810977
	0.1587			0.921488		0.811095
	0.1588			0.921515		0.811212
	0.1589			0.921543		0.811338
	0.159			0.921571		0.811449
	0.1591			0.9216		0.811572
	0.1592			0.921629		0.811688
	0.1593			0.92166		0.811808
	0.1594			0.92169		0.811936
	0.1595			0.921725		0.81206
	0.1596			0.921758		0.812184
	0.1597			0.921791		0.812309
	0.1598			0.921826		0.81244
	0.1599			0.92186		0.812567
	0.16			0.921891		0.812702
	0.1601			0.921927		0.812843
	0.1602			0.921964		0.812981
	0.1603			0.922003		0.813107
	0.1604			0.922043		0.813231
	0.1605			0.922079		0.81336
	0.1606			0.922116		0.81349
	0.1607			0.922151		0.813616
	0.1608			0.922184		0.813741
	0.1609			0.922219		0.813865
	0.161			0.922253		0.813978
	0.1611			0.922288		0.814083
	0.1612			0.922325		0.814202
	0.1613			0.922358		0.814324
	0.1614			0.922392		0.814439
	0.1615			0.922425		0.814548
	0.1616			0.922456		0.814658
	0.1617			0.922489		0.814782
	0.1618			0.922522		0.814904
	0.1619			0.922557		0.815021
	0.162			0.92259		0.815132
	0.1621			0.922624		0.815239
	0.1622			0.92266		0.815358
	0.1623			0.922689		0.815484
	0.1624			0.922722		0.815618
	0.1625			0.922757		0.815733
	0.1626			0.922789		0.815852
	0.1627			0.922821		0.815978
	0.1628			0.92286		0.8161
	0.1629			0.922899		0.81623
	0.163			0.922934		0.816359
	0.1631			0.922967		0.816486
	0.1632			0.923001		0.816609
	0.1633			0.923035		0.816725
	0.1634			0.92307		0.816845
	0.1635			0.923105		0.81697
	0.1636			0.923139		0.817093
	0.1637			0.923174		0.817207
	0.1638			0.923208		0.817322
	0.1639			0.923244		0.817438
	0.164			0.923276		0.817561
	0.1641			0.923307		0.817677
	0.1642			0.923342		0.817794
	0.1643			0.923379		0.817912
	0.1644			0.923404		0.818021
	0.1645			0.923429		0.818135
	0.1646			0.923462		0.818259
	0.1647			0.923494		0.818383
	0.1648			0.923526		0.8185
	0.1649			0.923554		0.818611
	0.165			0.923577		0.818717
	0.1651			0.923605		0.818832
	0.1652			0.923639		0.818948
	0.1653			0.923672		0.819067
	0.1654			0.923701		0.819181
	0.1655			0.923733		0.819305
	0.1656			0.923768		0.819428
	0.1657			0.923803		0.819552
	0.1658			0.923838		0.819677
	0.1659			0.923874		0.819804
	0.166			0.923906		0.819937
	0.1661			0.923938		0.820069
	0.1662			0.923975		0.820201
	0.1663			0.924009		0.82033
	0.1664			0.924044		0.820459
	0.1665			0.924077		0.820582
	0.1666			0.924108		0.820706
	0.1667			0.924147		0.820829
	0.1668			0.924183		0.82095
	0.1669			0.924218		0.821082
	0.167			0.924252		0.821208
	0.1671			0.924285		0.821337
	0.1672			0.924319		0.821468
	0.1673			0.924356		0.821593
	0.1674			0.924389		0.821711
	0.1675			0.924422		0.821837
	0.1676			0.924457		0.821965
	0.1677			0.924489		0.822094
	0.1678			0.924521		0.822214
	0.1679			0.924554		0.822343
	0.168			0.92459		0.822463
	0.1681			0.924624		0.822582
	0.1682			0.924655		0.8227
	0.1683			0.924687		0.822819
	0.1684			0.92472		0.822942
	0.1685			0.924751		0.823066
	0.1686			0.924782		0.823183
	0.1687			0.924814		0.823295
	0.1688			0.924844		0.823414
	0.1689			0.924876		0.823536
	0.169			0.924908		0.82365
	0.1691			0.924941		0.823762
	0.1692			0.924972		0.823881
	0.1693			0.925003		0.824009
	0.1694			0.925037		0.824135
	0.1695			0.925068		0.824259
	0.1696			0.925096		0.824378
	0.1697			0.925127		0.824495
	0.1698			0.925159		0.824625
	0.1699			0.925193		0.824757
	0.17			0.92522		0.824867
	0.1701			0.925244		0.824972
	0.1702			0.925269		0.825085
	0.1703			0.9253		0.825211
	0.1704			0.925333		0.825338
	0.1705			0.925361		0.825453
	0.1706			0.925385		0.825553
	0.1707			0.925413		0.825668
	0.1708			0.925448		0.825792
	0.1709			0.925476		0.825915
	0.171			0.925498		0.826024
	0.1711			0.925525		0.826137
	0.1712			0.925556		0.826268
	0.1713			0.925592		0.8264
	0.1714			0.925628		0.826525
	0.1715			0.92566		0.82665
	0.1716			0.925689		0.826781
	0.1717			0.925717		0.826916
	0.1718			0.925748		0.82705
	0.1719			0.925782		0.827189
	0.172			0.925818		0.827329
	0.1721			0.925852		0.827469
	0.1722			0.925885		0.827615
	0.1723			0.925921		0.827752
	0.1724			0.925957		0.827891
	0.1725			0.925987		0.828032
	0.1726			0.926016		0.828167
	0.1727			0.926049		0.828302
	0.1728			0.926081		0.828434
	0.1729			0.926112		0.828563
	0.173			0.926145		0.828702
	0.1731			0.926179		0.828843
	0.1732			0.926214		0.828978
	0.1733			0.926249		0.829108
	0.1734			0.926282		0.829234
	0.1735			0.926315		0.829366
	0.1736			0.926351		0.829503
	0.1737			0.926391		0.82962
	0.1738			0.926425		0.829733
	0.1739			0.926457		0.829855
	0.174			0.926493		0.829974
	0.1741			0.926531		0.830091
	0.1742			0.926571		0.830202
	0.1743			0.926606		0.830311
	0.1744			0.926641		0.830421
	0.1745			0.926677		0.830538
	0.1746			0.926713		0.830655
	0.1747			0.926751		0.830765
	0.1748			0.926786		0.830876
	0.1749			0.926822		0.830996
	0.175			0.926863		0.831113
	0.1751			0.926901		0.831233
	0.1752			0.926938		0.831365
	0.1753			0.926976		0.831499
	0.1754			0.927014		0.831625
	0.1755			0.927049		0.831756
	0.1756			0.927083		0.831889
	0.1757			0.92712		0.832009
	0.1758			0.927157		0.832121
	0.1759			0.927191		0.832243
	0.176			0.927226		0.832359
	0.1761			0.927264		0.832479
	0.1762			0.927302		0.832603
	0.1763			0.92734		0.832733
	0.1764			0.927378		0.83287
	0.1765			0.927412		0.833008
	0.1766			0.927443		0.833138
	0.1767			0.927476		0.833268
	0.1768			0.927511		0.833395
	0.1769			0.927546		0.833521
	0.177			0.927584		0.833658
	0.1771			0.927622		0.833789
	0.1772			0.927656		0.833909
	0.1773			0.927689		0.834015
	0.1774			0.927722		0.834127
	0.1775			0.927754		0.834247
	0.1776			0.92779		0.834367
	0.1777			0.927825		0.834475
	0.1778			0.927859		0.834584
	0.1779			0.927892		0.834699
	0.178			0.927921		0.834814
	0.1781			0.92795		0.834938
	0.1782			0.927981		0.835059
	0.1783			0.928015		0.835174
	0.1784			0.92805		0.835285
	0.1785			0.928083		0.835401
	0.1786			0.928113		0.835504
	0.1787			0.928144		0.835615
	0.1788			0.928176		0.835728
	0.1789			0.928206		0.83584
	0.179			0.928237		0.835952
	0.1791			0.928272		0.836062
	0.1792			0.928309		0.836174
	0.1793			0.928341		0.836288
	0.1794			0.928372		0.836396
	0.1795			0.928405		0.836506
	0.1796			0.928437		0.836622
	0.1797			0.928473		0.836728
	0.1798			0.928508		0.836837
	0.1799			0.928539		0.836955
	0.18			0.928571		0.83707
	0.1801			0.928603		0.837185
	0.1802			0.928636		0.837302
	0.1803			0.928668		0.837418
	0.1804			0.928697		0.837528
	0.1805			0.928725		0.837635
	0.1806			0.928755		0.837738
	0.1807			0.928786		0.837845
	0.1808			0.928814		0.837959
	0.1809			0.92884		0.838081
	0.181			0.928871		0.838203
	0.1811			0.928902		0.838325
	0.1812			0.928933		0.838453
	0.1813			0.928965		0.838571
	0.1814			0.928997		0.838693
	0.1815			0.929025		0.838822
	0.1816			0.929054		0.83895
	0.1817			0.929087		0.839068
	0.1818			0.929121		0.839191
	0.1819			0.929152		0.839311
	0.182			0.929177		0.839431
	0.1821			0.929205		0.83955
	0.1822			0.929236		0.839662
	0.1823			0.929266		0.839779
	0.1824			0.929297		0.839898
	0.1825			0.929326		0.84002
	0.1826			0.929355		0.840145
	0.1827			0.929388		0.840262
	0.1828			0.929421		0.840375
	0.1829			0.929455		0.840495
	0.183			0.929485		0.840611
	0.1831			0.929515		0.840734
	0.1832			0.929544		0.840858
	0.1833			0.929574		0.840975
	0.1834			0.929607		0.841092
	0.1835			0.929639		0.84122
	0.1836			0.929666		0.841345
	0.1837			0.929695		0.841467
	0.1838			0.929724		0.841585
	0.1839			0.929752		0.841692
	0.184			0.929785		0.841805
	0.1841			0.929816		0.841925
	0.1842			0.929847		0.842039
	0.1843			0.929877		0.842145
	0.1844			0.929908		0.842247
	0.1845			0.929939		0.842349
	0.1846			0.92997		0.842454
	0.1847			0.93		0.842567
	0.1848			0.930032		0.842676
	0.1849			0.930062		0.842777
	0.185			0.93009		0.84289
	0.1851			0.930123		0.843004
	0.1852			0.930155		0.843115
	0.1853			0.930188		0.843225
	0.1854			0.930223		0.843333
	0.1855			0.930256		0.843445
	0.1856			0.930287		0.843563
	0.1857			0.930318		0.843677
	0.1858			0.930353		0.843785
	0.1859			0.930389		0.843888
	0.186			0.930423		0.843993
	0.1861			0.930459		0.844109
	0.1862			0.930492		0.844216
	0.1863			0.930525		0.844326
	0.1864			0.930561		0.84443
	0.1865			0.930596		0.844529
	0.1866			0.93063		0.844627
	0.1867			0.930666		0.844726
	0.1868			0.930701		0.844829
	0.1869			0.930735		0.844922
	0.187			0.93077		0.845015
	0.1871			0.930802		0.845112
	0.1872			0.930834		0.845201
	0.1873			0.930865		0.845292
	0.1874			0.930898		0.84538
	0.1875			0.930932		0.84546
	0.1876			0.930961		0.845547
	0.1877			0.930994		0.845641
	0.1878			0.931028		0.845727
	0.1879			0.931062		0.845805
	0.188			0.931095		0.845887
	0.1881			0.931128		0.845969
	0.1882			0.931163		0.846055
	0.1883			0.931196		0.846144
	0.1884			0.931229		0.84624
	0.1885			0.931261		0.846337
	0.1886			0.931291		0.846429
	0.1887			0.931325		0.846519
	0.1888			0.931359		0.846607
	0.1889			0.931393		0.846705
	0.189			0.931425		0.846796
	0.1891			0.931455		0.846873
	0.1892			0.931488		0.846965
	0.1893			0.931515		0.84704
	0.1894			0.931534		0.847099
	0.1895			0.931556		0.847166
	0.1896			0.931583		0.847247
	0.1897			0.931611		0.847312
	0.1898			0.931637		0.847383
	0.1899			0.931658		0.847439
	0.19			0.931678		0.847501
	0.1901			0.931706		0.847574
	0.1902			0.931736		0.847646
	0.1903			0.931762		0.847714
	0.1904			0.931789		0.847788
	0.1905			0.931821		0.847859
	0.1906			0.931854		0.847927
	0.1907			0.931884		0.848005
	0.1908			0.931913		0.848083
	0.1909			0.931943		0.848153
	0.191			0.931975		0.848233
	0.1911			0.932006		0.848318
	0.1912			0.932038		0.848401
	0.1913			0.932068		0.848484
	0.1914			0.932094		0.848564
	0.1915			0.932121		0.848641
	0.1916			0.93215		0.848719
	0.1917			0.932178		0.848799
	0.1918			0.932207		0.848878
	0.1919			0.932235		0.848951
	0.192			0.932261		0.849028
	0.1921			0.932289		0.849102
	0.1922			0.93232		0.849178
	0.1923			0.93235		0.84926
	0.1924			0.932378		0.84934
	0.1925			0.932405		0.849425
	0.1926			0.932433		0.849502
	0.1927			0.932462		0.849572
	0.1928			0.932492		0.849652
	0.1929			0.932521		0.849736
	0.193			0.93255		0.849818
	0.1931			0.932578		0.849897
	0.1932			0.932608		0.849972
	0.1933			0.932635		0.850051
	0.1934			0.932664		0.850128
	0.1935			0.932693		0.850202
	0.1936			0.932721		0.85029
	0.1937			0.932751		0.850377
	0.1938			0.932779		0.850456
	0.1939			0.932805		0.850545
	0.194			0.932832		0.85064
	0.1941			0.932862		0.850719
	0.1942			0.932892		0.850808
	0.1943			0.932924		0.850894
	0.1944			0.932954		0.850981
	0.1945			0.932981		0.851071
	0.1946			0.933007		0.851166
	0.1947			0.933032		0.851251
	0.1948			0.933062		0.85134
	0.1949			0.933093		0.851421
	0.195			0.933115		0.851485
	0.1951			0.933139		0.85154
	0.1952			0.933165		0.851613
	0.1953			0.933188		0.851688
	0.1954			0.933208		0.851759
	0.1955			0.933224		0.851817
	0.1956			0.933243		0.851875
	0.1957			0.933271		0.851943
	0.1958			0.933298		0.852016
	0.1959			0.93332		0.852091
	0.196			0.933341		0.852158
	0.1961			0.933366		0.852229
	0.1962			0.933395		0.852308
	0.1963			0.933425		0.852394
	0.1964			0.933454		0.85249
	0.1965			0.933484		0.852584
	0.1966			0.933509		0.852671
	0.1967			0.933534		0.852756
	0.1968			0.933562		0.852846
	0.1969			0.933588		0.852951
	0.197			0.933614		0.853052
	0.1971			0.933637		0.853146
	0.1972			0.933657		0.853242
	0.1973			0.93368		0.853329
	0.1974			0.933706		0.853422
	0.1975			0.933733		0.853513
	0.1976			0.933754		0.853604
	0.1977			0.933775		0.853687
	0.1978			0.933795		0.85378
	0.1979			0.93382		0.853872
	0.198			0.933846		0.853959
	0.1981			0.933873		0.854054
	0.1982			0.933898		0.854142
	0.1983			0.933923		0.854221
	0.1984			0.933947		0.8543
	0.1985			0.933969		0.854387
	0.1986			0.933995		0.854464
	0.1987			0.934025		0.854533
	0.1988			0.934054		0.854608
	0.1989			0.934081		0.854686
	0.199			0.934105		0.854764
	0.1991			0.93413		0.854848
	0.1992			0.934155		0.854927
	0.1993			0.934178		0.855007
	0.1994			0.934203		0.855087
	0.1995			0.934228		0.855169
	0.1996			0.934255		0.85525
	0.1997			0.934282		0.855329
[truncated: 3,423 more rows]

## Sheet: Figure 1G
Table 1: Quantification of the neuronal survival and neurotransmitter release parameters of STX1-null neurons lentiviralli transduced with STX1A WT or STX2 WT
Parameter measured	Statistical test	Genotype	Number of independent cultures	Number of observations	Parametric distribution 'D'Agostino-Pearson test'	Mean	SEM	Minimum	25% Percentile	Median	75% Percentile	Maximum	Mean ranks	Adjusted p-value (vs WT)
EPSC half width (ms)	Mann-Whitney test	STX1A-WT	3	34	Yes	4.901	0.1724	3.079	4.358	4.635	5.273	7.418	19.65
		STX2-WT	3	32	No	10.54	0.7627	3.81	7.982	9.776	12.9	23.02	48.22	<0.0001

## Sheet: Figure 1H
Table 1: Quantification of the neuronal survival and neurotransmitter release parameters of STX1-null neurons lentiviralli transduced with STX1A WT or STX2 WT
Parameter measured	Statistical test	Genotype	Number of independent cultures	Number of observations	Parametric distribution 'D'Agostino-Pearson test'	Mean	SEM	Minimum	25% Percentile	Median	75% Percentile	Maximum	Mean ranks	Adjusted p-value (vs WT)
RRP (nC)	Mann-Whitney test	STX1A-WT	3	33	No	0.4786	0.06676	1.64	0.7184	0.3309	0.2107	0.0287	20.79
		STX2-WT	3	30	No	0.1179	0.01968	0.51	0.15	0.095	0.0404	0.01	44.33	<0.0001

## Sheet: Figure 1I
Table 1: Quantification of the neuronal survival and neurotransmitter release parameters of STX1-null neurons lentiviralli transduced with STX1A WT or STX2 WT
Parameter measured	Statistical test	Genotype	Number of independent cultures	Number of observations	Parametric distribution 'D'Agostino-Pearson test'	Mean	SEM	Minimum	25% Percentile	Median	75% Percentile	Maximum	Adjusted p-value (vs WT)
mEPSC frequency (Hz)	two-tailed t-test	STX1A-WT	3	32	Yes	7.013	0.8365	0.04	2.878	7.03	9.75	16.17
		STX2-WT	3	35	Yes	15.95	1.466	0.52	9.73	17.71	22.96	32.92	<0.0001

## Sheet: Figure 1J
Table 1: Quantification of the neuronal survival and neurotransmitter release parameters of STX1-null neurons lentiviralli transduced with STX1A WT or STX2 WT
Parameter measured	Statistical test	Genotype	Number of independent cultures	Number of observations	Parametric distribution 'D'Agostino-Pearson test'	Mean	SEM	Minimum	25% Percentile	Median	75% Percentile	Maximum	Mean ranks	Adjusted p-value (vs WT)
PVR (%)	Mann-Whitney test	STX1A-WT	3	32	No	6.835	0.749	1.115	3.94	5.51	9.356	18.09	26.26
		STX2-WT	3	30	Yes	10.67	1.119	1.441	4.694	10.98	14.26	25.58	37.89	<0.0001

## Sheet: Figure 1K
Table 1: Quantification of the neuronal survival and neurotransmitter release parameters of STX1-null neurons lentiviralli transduced with STX1A WT or STX2 WT
Parameter measured	Statistical test	Genotype	Number of independent cultures	Number of observations	Parametric distribution 'D'Agostino-Pearson test'	Mean	SEM	Minimum	25% Percentile	Median	75% Percentile	Maximum	Mean ranks	Adjusted p-value (vs WT)
Spontaneous vesicular release rate (s-1)	Mann-Whitney test	STX1A-WT	3	32	No	0.002047	0.0004208	0.0001063	0.0009487	0.001485	0.002426	0.01325	18.31
		STX2-WT	3	30	No	0.03094	0.004578	0.002	0.01449	0.023	0.04511	0.1024	46.13	<0.0001

## Sheet: Figure 1L
Table 1: Quantification of the neuronal survival and neurotransmitter release parameters of STX1-null neurons lentiviralli transduced with STX1A WT or STX2 WT
Parameter measured	Statistical test	Genotype	Number of independent cultures	Number of observations	Parametric distribution 'D'Agostino-Pearson test'	Mean	SEM	Minimum	25% Percentile	Median	75% Percentile	Maximum	Mean ranks	Adjusted p-value (vs WT)
EPSC2/EPSC1	Mann-Whitney test	STX1A-WT	3	37	No	1.079	0.04628	0.59	0.9128	1.04	1.225	2.14	40.73
		STX2-WT	3	35	No	0.971	0.08189	0.2175	0.6928	0.92	1.17	2.47	32.03	0.0783
