# Supplementary material for: The stability of the primed pool of synaptic vesicles and the clamping of spontaneous neurotransmitter release rely on the integrity of the C-terminal half of the SNARE domain of syntaxin-1A
Source: eLife. 2024 Mar 21;12:RP90775. doi: 10.7554/eLife.90775 (PMC10957171; doi:10.7554/eLife.90775)
Supplement: Figure 2—figure supplement 1—source data 1. [file elife-90775-fig2-figsupp1-data1.xlsx]

## Sheet: F2 - fig. Supp. 1A
Table 1: Quantification of the neurotransmitter release parameters in STX1-null neurons lentivirally transdicuced with STX1A-STX2 chimeras
Parameter measured	Statistical test	Genotype	Number of independent cultures	Number of observations	Parametric distribution 'D'Agostino & Pearson test'	Mean	SEM	Minimum	25% Percentile	Median	75% Percentile	Maximum	Mean ranks	Adjusted p-value (vs STX1A WT)
EPSC rise time (20-80%) (ms)	Kruskal-Wallis; Dunn's post-hoc	STX1A	4	57	No	0.8183	0.03827	0.17	0.69	0.79	0.94	1.88	110.5
		STX1A-2(SNARE)	4	51	No	0.7871	0.04083	0.21	0.65	0.74	0.88	2.1	100.3	>0.9999
		STX1A-2(Nter)	4	52	No	0.809	0.04842	0.35	0.5725	0.705	1.018	2.21	93.73	0.9185
		STX1A-2(Cter)	4	52	No	0.8988	0.04081	0.46	0.685	0.89	1.048	1.93	121	>0.9999

## Sheet: F2 - fig. Supp. 1B
Table 1: Quantification of the neurotransmitter release parameters in STX1-null neurons lentivirally transdicuced with STX1A-STX2 chimeras
Parameter measured	Statistical test	Genotype	Number of independent cultures	Number of observations	Parametric distribution 'D'Agostino & Pearson test'	Mean	SEM	Minimum	25% Percentile	Median	75% Percentile	Maximum	Mean ranks	Adjusted p-value (vs STX1A WT)
EPSC decay (80-20%) (ms)	Kruskal-Wallis; Dunn's post-hoc	STX1A	4	56	No	7.745	0.299	4.11	6.24	7.315	9.085	14.68	102.4
		STX1A-2(SNARE)	4	51	No	8.121	0.3643	4.55	6.66	7.66	9.19	19.14	111.8	>0.9999
		STX1A-2(Nter)	4	53	No	7.606	0.3664	3.41	5.853	6.995	8.708	15.83	95.42	>0.9999
		STX1A-2(Cter)	4	53	No	8.515	0.3873	3.86	6.488	7.78	9.973	18.23	119	0.9512

## Sheet: F2 - fig. Supp. 1C
Table 1: Quantification of the neurotransmitter release parameters in STX1-null neurons lentivirally transdicuced with STX1A-STX2 chimeras
Parameter measured	Statistical test	Genotype	Number of independent cultures	Number of observations	Parametric distribution 'D'Agostino & Pearson test'	Mean	SEM	Minimum	25% Percentile	Median	75% Percentile	Maximum	Mean ranks	Adjusted p-value (vs STX1A WT)
mEPSC charge (pC)	Kruskal-Wallis; Dunn's post-hoc	STX1A	4	53	No	110.4	5.559	50.91	87.06	103.2	124.2	300.9	128.3
		STX1A-2(SNARE)	4	50	No	145	6.501	76.11	107.6	144	166	274.2	75.2	<0.0001
		STX1A-2(Nter)	4	52	No	122	6.922	60.01	90.35	116.6	133.7	303.4	113	>0.9999
		STX1A-2(Cter)	4	53	Yes	124.9	5.293	55.03	92.33	124.7	151.1	231.1	99.96	0.0917

## Sheet: F2 - fig. Supp. 1D
Table 1: Quantification of the neurotransmitter release parameters in STX1-null neurons lentivirally transdicuced with STX1A-STX2 chimeras
Parameter measured	Statistical test	Genotype	Number of independent cultures	Number of observations	Parametric distribution 'D'Agostino & Pearson test'	Mean	SEM	Minimum	25% Percentile	Median	75% Percentile	Maximum	Mean ranks	Adjusted p-value (vs STX1A WT)
mEPSC amplitude (pA)	Kruskal-Wallis; Dunn's post-hoc	STX1A	4	53	No	28.75	1.487	14.3	22.75	25.99	32.24	80.25	49.7
		STX1A-2(SNARE)	4	40	Yes	37.46	1.58	19.65	29.02	36.34	42.54	69.38	144.4	<0.0001
		STX1A-2(Nter)	4	52	No	32.76	1.773	11.76	23.98	30.78	37.8	75.38	81.34	0.0212
		STX1A-2(Cter)	4	53	Yes	32.74	1.319	15.23	24.43	32.39	38.08	56.77	136.1	<0.0001

## Sheet: F2 - fig. Supp. 1E
Table 1: Quantification of the neurotransmitter release parameters in STX1-null neurons lentivirally transdicuced with STX1A-STX2 chimeras
Parameter measured	Statistical test	Genotype	Number of independent cultures	Number of observations	Parametric distribution 'D'Agostino & Pearson test'	Mean	SEM	Minimum	25% Percentile	Median	75% Percentile	Maximum	Mean ranks	Adjusted p-value (vs STX1A WT)
mEPSC rise time (20-80%) (ms)	Kruskal-Wallis; Dunn's post-hoc	STX1A	4	46	No	0.4435	0.006769	0.3621	0.4023	0.4403	0.475	0.6172	77.71
		STX1A-2(SNARE)	4	40	No	0.5358	0.01514	0.3854	0.4598	0.5265	0.5797	0.9346	140.3	<0.0001
		STX1A-2(Nter)	4	42	No	0.4582	0.01094	0.3439	0.3993	0.4475	0.4835	0.6931	86.43	>0.9999
		STX1A-2(Cter)	4	49	No	0.507	0.01251	0.333	0.4369	0.4962	0.5465	0.7723	124.8	0.0004

## Sheet: F2 - fig. Supp. 1F
Table 1: Quantification of the neurotransmitter release parameters in STX1-null neurons lentivirally transdicuced with STX1A-STX2 chimeras
Parameter measured	Statistical test	Genotype	Number of independent cultures	Number of observations	Parametric distribution 'D'Agostino & Pearson test'	Mean	SEM	Minimum	25% Percentile	Median	75% Percentile	Maximum	Adjusted p-value (vs STX1A WT)
mEPSC half width (ms)	Ordinar one-way ANOVA	STX1A	4	4356	Yes	3.284	0.06039	2.394	2.925	3.321	3.624	4.145
		STX1A-2(SNARE)	4	51	Yes	3.334	0.04611	2.494	3.138	3.349	3.534	4.05	0.9115
		STX1A-2(Nter)	4	53	Yes	3.146	0.07225	2.168	2.757	3.156	3.489	4.351	0.3444
		STX1A-2(Cter)	4	53	Yes	3.294	0.05532	2.467	2.98	3.365	3.571	4.024	0.9115

## Sheet: F2 - fig. Supp. 1G
Table 1: Quantification of the neurotransmitter release parameters in STX1-null neurons lentivirally transdicuced with STX1A-STX2 chimeras
Parameter measured	Statistical test	Genotype	Number of independent cultures	Number of observations	Parametric distribution 'D'Agostino & Pearson test'	Mean	SEM	Minimum	25% Percentile	Median	75% Percentile	Maximum	Mean ranks	Adjusted p-value (vs STX1A WT)
mEPSC decay (80-20%) (ms)	Ordinar one-way ANOVA	STX1A	4	41	Yes	4.514	0.07075	3.53	4.108	4.499	4.826	6.179	146
		STX1A-2(SNARE)	4	37	Yes	3.997	0.04059	3.34	3.756	3.96	4.176	4.68	85.08	<0.0001
		STX1A-2(Nter)	4	41	Yes	4.171	0.06878	3.105	3.735	4.127	4.611	5.201	108.7	0.0003
		STX1A-2(Cter)	4	48	Yes	4.009	0.05383	3.322	3.765	3.942	4.278	4.981	85.26	<0.0001
