# Supplementary material for: The stability of the primed pool of synaptic vesicles and the clamping of spontaneous neurotransmitter release rely on the integrity of the C-terminal half of the SNARE domain of syntaxin-1A
Source: eLife. 2024 Mar 21;12:RP90775. doi: 10.7554/eLife.90775 (PMC10957171; doi:10.7554/eLife.90775)
Supplement: Figure 2—source data 1. [file elife-90775-fig2-data1.xlsx]

## Sheet: Figure 2B
Table 2: Quantification of the neurotransmitter release parameters in STX1-null neurons lentivirally transdicuced with STX1A-STX2 chimeras
Parameter measured	Statistical test	Genotype	Number of independent cultures	Number of observations	Parametric distribution 'D'Agostino & Pearson test'	Mean	SEM	Minimum	25% Percentile	Median	75% Percentile	Maximum	Mean ranks	Adjusted p-value (vs WT)
EPSC Amplitude (nA)	Kruskal-Wallis; Dunn's post-hoc	STX1A	4	57	No	6.088	0.5577	0.4316	2.59	5.143	8.3	19.01	128.6
		STX1A-2(SNARE)	4	51	No	3.362	0.4629	0.09817	1.526	2.185	3.827	14.82	77.18	<0.0001
		STX1A-2(Nter)	4	53	No	6.4	0.6299	1.042	2.955	5.053	9.712	19.12	129	>0.9999
		STX1A-2(Cter)	4	54	Yes	3.701	0.3216	0.2059	2.098	3.083	5.178	9.91	94.78	0.0127

## Sheet: Figure 2C
Parameter measured	Time (x-axis)	Number of independent cultures	Number of observations	Mean	Number of observations	Mean	Number of observations	Mean	Number of observations	Mean
Cumulative charge transfer			STX1A		STX1A-2(SNARE)		STX1A-2(Nter)		STX1A-2(Cter)
	0	4	57	0.00240856	51	0.00404424	53	0.0047712	54	0.00223059
	0.0001			0.00435016		0.00652087		0.00778022		0.00375885
	0.0002			0.00698822		0.00954725		0.0115731		0.00581515
	0.0003			0.010354		0.0131057		0.0161002		0.00849861
	0.0004			0.0144189		0.0171904		0.0213053		0.0118167
	0.0005			0.0191571		0.0218541		0.0271259		0.0157949
	0.0006			0.0245578		0.0270442		0.0335155		0.0204361
	0.0007			0.0305925		0.0327415		0.0404292		0.0256903
	0.0008			0.0372077		0.0389196		0.0478156		0.0315175
	0.0009			0.0443406		0.0455454		0.0556253		0.0378775
	0.001			0.0519406		0.0525892		0.0638164		0.0447272
	0.0011			0.0599607		0.0600152		0.0723439		0.0520184
	0.0012			0.0683513		0.0677809		0.0811594		0.0597056
	0.0013			0.0770647		0.0758389		0.0902166		0.0677427
	0.0014			0.0860567		0.0841439		0.0994741		0.0760864
	0.0015			0.0952865		0.0926525		0.108896		0.0846898
	0.0016			0.104709		0.101323		0.118448		0.0935078
	0.0017			0.114286		0.110116		0.128094		0.102501
	0.0018			0.123986		0.118997		0.137805		0.111632
	0.0019			0.13378		0.127937		0.147548		0.12087
	0.002			0.14364		0.136911		0.157298		0.130182
	0.0021			0.15354		0.145892		0.167031		0.139543
	0.0022			0.163454		0.154859		0.176729		0.14893
	0.0023			0.173362		0.163804		0.18638		0.158321
	0.0024			0.183241		0.172706		0.195968		0.167696
	0.0025			0.193071		0.181554		0.205477		0.177032
	0.0026			0.202834		0.190338		0.214895		0.186314
	0.0027			0.21252		0.199048		0.224214		0.195526
	0.0028			0.222115		0.207678		0.233427		0.204654
	0.0029			0.231609		0.216214		0.242529		0.213689
	0.003			0.24099		0.224654		0.251515		0.222621
	0.0031			0.250252		0.232994		0.260381		0.231447
	0.0032			0.259393		0.24123		0.269124		0.240158
	0.0033			0.268407		0.249358		0.277744		0.248745
	0.0034			0.277292		0.257378		0.28624		0.257211
	0.0035			0.286045		0.265281		0.294611		0.26556
	0.0036			0.294666		0.273069		0.302859		0.273787
	0.0037			0.303153		0.280737		0.310986		0.281893
	0.0038			0.311506		0.288286		0.318995		0.289878
	0.0039			0.319725		0.295719		0.326885		0.297737
	0.004			0.327808		0.303038		0.334654		0.305472
	0.0041			0.335759		0.310242		0.342302		0.313083
	0.0042			0.343576		0.317331		0.34983		0.320572
	0.0043			0.351259		0.324306		0.357242		0.327939
	0.0044			0.358807		0.331172		0.364537		0.335188
	0.0045			0.366226		0.337928		0.371716		0.342321
	0.0046			0.373516		0.344575		0.378778		0.349336
	0.0047			0.38068		0.351117		0.385726		0.356236
	0.0048			0.387718		0.357556		0.392561		0.363026
	0.0049			0.394632		0.363892		0.399283		0.369707
	0.005			0.401424		0.370128		0.405896		0.37628
	0.0051			0.408099		0.376266		0.4124		0.382744
	0.0052			0.414658		0.382305		0.418797		0.389099
	0.0053			0.421102		0.388245		0.425088		0.395351
	0.0054			0.42743		0.39409		0.431275		0.401498
	0.0055			0.433642		0.399844		0.437361		0.407543
	0.0056			0.439746		0.405505		0.443346		0.413485
	0.0057			0.445745		0.411077		0.449233		0.41933
	0.0058			0.451639		0.416562		0.455019		0.42508
	0.0059			0.457428		0.421967		0.460711		0.430739
	0.006			0.463116		0.427287		0.466309		0.436304
	0.0061			0.468704		0.432523		0.471812		0.441777
	0.0062			0.474194		0.437681		0.477223		0.447156
	0.0063			0.479588		0.442756		0.482543		0.452445
	0.0064			0.48489		0.447754		0.487775		0.45765
	0.0065			0.490101		0.452675		0.49292		0.462765
	0.0066			0.495224		0.457518		0.497977		0.467798
	0.0067			0.500257		0.462287		0.502952		0.472749
	0.0068			0.505205		0.466984		0.507845		0.477618
	0.0069			0.510069		0.471606		0.512658		0.482405
	0.007			0.514853		0.476157		0.517391		0.487113
	0.0071			0.519553		0.480641		0.522046		0.491741
	0.0072			0.524174		0.485056		0.526623		0.496293
	0.0073			0.528718		0.489404		0.531125		0.500771
	0.0074			0.533185		0.493685		0.535555		0.505178
	0.0075			0.537579		0.497907		0.539912		0.509514
	0.0076			0.5419		0.502067		0.5442		0.513781
	0.0077			0.546149		0.506166		0.54842		0.517981
	0.0078			0.55033		0.510205		0.552573		0.522117
	0.0079			0.554443		0.514184		0.556661		0.526188
	0.008			0.558488		0.518104		0.560683		0.530193
	0.0081			0.562467		0.521967		0.564639		0.534136
	0.0082			0.566383		0.525776		0.568533		0.538018
	0.0083			0.570236		0.529533		0.572365		0.541839
	0.0084			0.574028		0.533236		0.576135		0.545603
	0.0085			0.577757		0.536887		0.579846		0.549309
	0.0086			0.581425		0.540486		0.583498		0.552961
	0.0087			0.585037		0.544033		0.587093		0.556551
	0.0088			0.588594		0.547529		0.590632		0.560088
	0.0089			0.592094		0.550975		0.594116		0.563575
	0.009			0.595539		0.554375		0.597549		0.567011
	0.0091			0.59893		0.557728		0.600928		0.570392
	0.0092			0.602269		0.561032		0.604256		0.573723
	0.0093			0.605557		0.564289		0.607534		0.577005
	0.0094			0.608795		0.567501		0.61076		0.580237
	0.0095			0.611983		0.570668		0.613939		0.583416
	0.0096			0.615123		0.573793		0.617069		0.586548
	0.0097			0.618216		0.576874		0.620152		0.589633
	0.0098			0.621263		0.579912		0.623189		0.592674
	0.0099			0.624265		0.582908		0.62618		0.595669
	0.01			0.627223		0.585862		0.629126		0.598621
	0.0101			0.630135		0.588776		0.632031		0.601533
	0.0102			0.633002		0.59165		0.634892		0.604402
	0.0103			0.635827		0.594487		0.637711		0.607226
	0.0104			0.638611		0.597288		0.640489		0.610011
	0.0105			0.641355		0.600052		0.643228		0.612758
	0.0106			0.644057		0.602782		0.645925		0.615467
	0.0107			0.64672		0.605477		0.648584		0.618141
	0.0108			0.649344		0.608136		0.651203		0.620779
	0.0109			0.651931		0.610762		0.653784		0.623379
	0.011			0.654479		0.613359		0.656327		0.625942
	0.0111			0.65699		0.615922		0.658834		0.628468
	0.0112			0.659466		0.618452		0.661303		0.630959
	0.0113			0.661907		0.620949		0.663736		0.633415
	0.0114			0.664313		0.623413		0.666138		0.635841
	0.0115			0.666685		0.625847		0.668504		0.638236
	0.0116			0.669023		0.62825		0.670836		0.640596
	0.0117			0.671326		0.630624		0.673135		0.642924
	0.0118			0.673598		0.632968		0.675401		0.645223
	0.0119			0.675838		0.635282		0.677635		0.647493
	0.012			0.678045		0.637568		0.679841		0.64973
	0.0121			0.68022		0.639827		0.682015		0.651939
	0.0122			0.682367		0.642057		0.68416		0.654119
	0.0123			0.684485		0.64426		0.686275		0.656269
	0.0124			0.686573		0.64644		0.68836		0.658391
	0.0125			0.688632		0.648592		0.690414		0.660486
	0.0126			0.690664		0.650717		0.692441		0.662552
	0.0127			0.692668		0.652818		0.694441		0.66459
	0.0128			0.694646		0.654894		0.696413		0.666602
	0.0129			0.696599		0.656943		0.698358		0.668589
	0.013			0.698524		0.658972		0.700276		0.670549
	0.0131			0.700423		0.660978		0.702168		0.672485
	0.0132			0.702297		0.66296		0.704033		0.674398
	0.0133			0.704145		0.66492		0.705874		0.676291
	0.0134			0.705969		0.666855		0.707691		0.678161
	0.0135			0.707769		0.668767		0.709483		0.680008
	0.0136			0.709543		0.670662		0.711249		0.681834
	0.0137			0.711295		0.672532		0.712994		0.683638
	0.0138			0.713022		0.674382		0.714718		0.68542
	0.0139			0.714729		0.676211		0.716418		0.687177
	0.014			0.716415		0.678018		0.718096		0.688914
	0.0141			0.718078		0.679806		0.71975		0.690628
	0.0142			0.719719		0.681576		0.721385		0.69232
	0.0143			0.72134		0.68333		0.722998		0.69399
	0.0144			0.72294		0.685065		0.724589		0.695639
	0.0145			0.72452		0.68678		0.726161		0.697271
	0.0146			0.726081		0.688475		0.727714		0.698883
	0.0147			0.727622		0.690153		0.729247		0.700473
	0.0148			0.729142		0.691816		0.73076		0.702044
	0.0149			0.730645		0.693461		0.732253		0.703597
	0.015			0.732129		0.695085		0.73373		0.705132
	0.0151			0.733593		0.696693		0.735189		0.706647
	0.0152			0.735041		0.698285		0.736629		0.708144
	0.0153			0.736471		0.699858		0.738052		0.709625
	0.0154			0.737882		0.701412		0.739456		0.71109
	0.0155			0.739276		0.70295		0.740844		0.712538
	0.0156			0.740653		0.704472		0.742215		0.713969
	0.0157			0.742014		0.705977		0.74357		0.715383
	0.0158			0.743357		0.707466		0.744906		0.716781
	0.0159			0.744685		0.708938		0.746227		0.718163
	0.016			0.745996		0.710395		0.747531		0.719533
	0.0161			0.74729		0.711839		0.748818		0.720888
	0.0162			0.748569		0.71327		0.750091		0.722225
	0.0163			0.749834		0.714684		0.75135		0.72355
	0.0164			0.751083		0.716084		0.752594		0.72486
	0.0165			0.752315		0.717472		0.753822		0.726155
	0.0166			0.753534		0.718845		0.755037		0.727436
	0.0167			0.754739		0.720204		0.756237		0.728701
	0.0168			0.755929		0.721548		0.757422		0.729951
	0.0169			0.757106		0.722879		0.758594		0.731187
	0.017			0.758269		0.724195		0.75975		0.732413
	0.0171			0.759418		0.725499		0.760895		0.733625
	0.0172			0.760552		0.726794		0.762026		0.734824
	0.0173			0.761672		0.728076		0.763144		0.736009
	0.0174			0.762779		0.729346		0.764249		0.737184
	0.0175			0.763873		0.730603		0.765341		0.738346
	0.0176			0.764955		0.731846		0.766422		0.739495
	0.0177			0.766027		0.73308		0.767491		0.740633
	0.0178			0.767085		0.734301		0.768549		0.741762
	0.0179			0.76813		0.735513		0.769596		0.742881
	0.018			0.769164		0.736715		0.77063		0.743988
	0.0181			0.770186		0.737907		0.77165		0.745083
	0.0182			0.771197		0.739084		0.77266		0.746164
	0.0183			0.772196		0.740248		0.773657		0.747235
	0.0184			0.773185		0.741403		0.774642		0.748298
	0.0185			0.774163		0.74255		0.775616		0.74935
	0.0186			0.775129		0.743684		0.77658		0.750391
	0.0187			0.776085		0.74481		0.777533		0.751419
	0.0188			0.777029		0.745924		0.778473		0.752438
	0.0189			0.777963		0.747027		0.779405		0.753446
	0.019			0.778888		0.74812		0.780327		0.754445
	0.0191			0.779802		0.749207		0.781239		0.755433
	0.0192			0.780707		0.750285		0.78214		0.756412
	0.0193			0.781602		0.751349		0.78303		0.757381
	0.0194			0.782487		0.752404		0.783912		0.758341
	0.0195			0.783363		0.753449		0.784785		0.759291
	0.0196			0.78423		0.754485		0.785648		0.760232
	0.0197			0.785087		0.755513		0.786503		0.761166
	0.0198			0.785936		0.75653		0.787348		0.762089
	0.0199			0.786777		0.757534		0.788182		0.763003
	0.02			0.787608		0.758531		0.789006		0.763905
	0.0201			0.78843		0.759517		0.789823		0.764797
	0.0202			0.789245		0.760496		0.790631		0.765681
	0.0203			0.790054		0.761467		0.791428		0.766556
	0.0204			0.790854		0.762432		0.792217		0.767426
	0.0205			0.791647		0.763389		0.792998		0.768288
	0.0206			0.79243		0.764338		0.79377		0.769142
	0.0207			0.793205		0.765277		0.794535		0.76999
	0.0208			0.793972		0.766207		0.795292		0.770828
	0.0209			0.794732		0.76713		0.796041		0.771656
	0.021			0.795485		0.768048		0.796782		0.772477
	0.0211			0.796229		0.768957		0.797516		0.773291
	0.0212			0.796965		0.769856		0.798241		0.774098
	0.0213			0.797693		0.770749		0.798961		0.774899
	0.0214			0.798414		0.771633		0.799673		0.775689
	0.0215			0.799126		0.772505		0.800378		0.776471
	0.0216			0.799832		0.77337		0.801077		0.777248
	0.0217			0.800531		0.774229		0.801769		0.778018
	0.0218			0.801225		0.775082		0.802455		0.77878
	0.0219			0.801912		0.775924		0.803134		0.779537
	0.022			0.802593		0.776758		0.803809		0.780287
	0.0221			0.803267		0.777586		0.804476		0.781032
	0.0222			0.803934		0.778404		0.805137		0.781768
	0.0223			0.804595		0.779217		0.805792		0.782497
	0.0224			0.805249		0.780023		0.806443		0.78322
	0.0225			0.805897		0.780821		0.807085		0.783937
	0.0226			0.806539		0.781612		0.807721		0.784649
	0.0227			0.807176		0.782395		0.808353		0.785357
	0.0228			0.807805		0.783172		0.808978		0.78606
	0.0229			0.808427		0.783946		0.809598		0.786757
	0.023			0.809042		0.784714		0.810211		0.787452
	0.0231			0.809653		0.785476		0.810819		0.788141
	0.0232			0.810257		0.786233		0.811421		0.788826
	0.0233			0.810855		0.786983		0.812018		0.789505
	0.0234			0.811447		0.787727		0.812611		0.790175
	0.0235			0.812034		0.788464		0.813196		0.790842
	0.0236			0.812616		0.789195		0.813775		0.791503
	0.0237			0.813192		0.789919		0.814349		0.792157
	0.0238			0.813761		0.790636		0.814919		0.792805
	0.0239			0.814324		0.791349		0.815482		0.793449
	0.024			0.814884		0.792059		0.816039		0.794087
	0.0241			0.81544		0.792762		0.816592		0.79472
	0.0242			0.815988		0.793457		0.81714		0.795348
	0.0243			0.816531		0.794148		0.817683		0.795968
	0.0244			0.817067		0.794835		0.818223		0.796583
	0.0245			0.817602		0.795515		0.818758		0.797193
	0.0246			0.818133		0.796192		0.819289		0.797799
	0.0247			0.818659		0.796864		0.819814		0.798402
	0.0248			0.819178		0.79753		0.820335		0.798997
	0.0249			0.819692		0.798191		0.820854		0.799588
	0.025			0.820203		0.798851		0.821368		0.800174
	0.0251			0.820709		0.799506		0.821878		0.800754
	0.0252			0.821212		0.800155		0.822383		0.801331
	0.0253			0.821712		0.800799		0.822883		0.801903
	0.0254			0.822205		0.801439		0.823379		0.802471
	0.0255			0.822693		0.802075		0.823873		0.803033
	0.0256			0.823176		0.802704		0.824364		0.80359
	0.0257			0.823658		0.80333		0.82485		0.804143
	0.0258			0.824135		0.80395		0.825332		0.804692
	0.0259			0.824608		0.804567		0.82581		0.805235
	0.026			0.825076		0.805177		0.826283		0.805777
	0.0261			0.825543		0.805782		0.826753		0.806315
	0.0262			0.826006		0.806381		0.827218		0.806848
	0.0263			0.826465		0.806979		0.827679		0.807377
	0.0264			0.826918		0.80757		0.828135		0.807902
	0.0265			0.827366		0.808155		0.828588		0.808423
	0.0266			0.827814		0.808739		0.829037		0.80894
	0.0267			0.828256		0.809318		0.829484		0.809454
	0.0268			0.828694		0.809894		0.829929		0.809965
	0.0269			0.829128		0.810467		0.830369		0.810472
	0.027			0.829559		0.811037		0.830804		0.810974
	0.0271			0.829987		0.811601		0.831239		0.811472
	0.0272			0.830411		0.812161		0.831671		0.811969
	0.0273			0.83083		0.812717		0.832098		0.812462
	0.0274			0.831247		0.813269		0.83252		0.812952
	0.0275			0.831661		0.813817		0.83294		0.81344
	0.0276			0.832071		0.814363		0.833358		0.813922
	0.0277			0.832475		0.814905		0.833772		0.814402
	0.0278			0.832878		0.815443		0.834182		0.814878
	0.0279			0.833278		0.815975		0.83459		0.815351
	0.028			0.833675		0.816505		0.834994		0.815819
	0.0281			0.834069		0.817033		0.835395		0.816284
	0.0282			0.834461		0.817554		0.835794		0.816746
	0.0283			0.834849		0.818073		0.836189		0.817205
	0.0284			0.835234		0.818592		0.83658		0.817662
	0.0285			0.835619		0.819108		0.836971		0.818115
	0.0286			0.836		0.819621		0.837359		0.818564
	0.0287			0.836377		0.820128		0.837744		0.819009
	0.0288			0.836752		0.820634		0.838128		0.819453
	0.0289			0.837124		0.821138		0.83851		0.819892
	0.029			0.837492		0.821638		0.83889		0.820329
	0.0291			0.837858		0.822133		0.839267		0.820764
	0.0292			0.83822		0.822625		0.839643		0.821195
	0.0293			0.83858		0.823114		0.840016		0.821625
	0.0294			0.838936		0.8236		0.840384		0.822053
	0.0295			0.839289		0.824082		0.840751		0.822479
	0.0296			0.839641		0.824561		0.841113		0.822903
	0.0297			0.839989		0.825037		0.841472		0.823323
	0.0298			0.840336		0.82551		0.841828		0.823741
	0.0299			0.840681		0.825977		0.842183		0.824156
	0.03			0.841024		0.82644		0.842535		0.824567
	0.0301			0.841364		0.8269		0.842884		0.824974
	0.0302			0.8417		0.827358		0.843229		0.825379
	0.0303			0.842036		0.827814		0.843573		0.825781
	0.0304			0.842368		0.828263		0.843913		0.826181
	0.0305			0.842697		0.828711		0.844252		0.826578
	0.0306			0.843024		0.829156		0.844592		0.826974
	0.0307			0.843348		0.829599		0.844927		0.827367
	0.0308			0.84367		0.830043		0.84526		0.827758
	0.0309			0.843989		0.830482		0.845591		0.828147
	0.031			0.844305		0.830917		0.845921		0.828534
	0.0311			0.844619		0.83135		0.846248		0.828917
	0.0312			0.844932		0.831782		0.846572		0.829296
	0.0313			0.845244		0.83221		0.846895		0.829675
	0.0314			0.845553		0.832638		0.847215		0.830052
	0.0315			0.845858		0.833063		0.847532		0.830425
	0.0316			0.84616		0.833486		0.847846		0.830793
	0.0317			0.84646		0.833904		0.848159		0.83116
	0.0318			0.846758		0.83432		0.84847		0.831524
	0.0319			0.847054		0.834732		0.848778		0.831889
	0.032			0.847349		0.835141		0.849084		0.832251
	0.0321			0.847642		0.835545		0.849388		0.832611
	0.0322			0.847931		0.835947		0.849691		0.832968
	0.0323			0.848219		0.836346		0.849992		0.833325
	0.0324			0.848506		0.836742		0.850289		0.833681
	0.0325			0.84879		0.837139		0.850587		0.834033
	0.0326			0.849072		0.837532		0.850883		0.834382
	0.0327			0.849352		0.837923		0.851177		0.834731
	0.0328			0.849632		0.838314		0.851469		0.835075
	0.0329			0.849911		0.838702		0.851761		0.835418
	0.033			0.850188		0.839088		0.852052		0.835758
	0.0331			0.850464		0.839472		0.852342		0.836097
	0.0332			0.850738		0.839854		0.852628		0.836433
	0.0333			0.851011		0.840232		0.852912		0.836769
	0.0334			0.851281		0.840609		0.853195		0.837101
	0.0335			0.851549		0.840982		0.853477		0.837432
	0.0336			0.851816		0.841355		0.853756		0.837763
	0.0337			0.852081		0.841724		0.854036		0.838088
	0.0338			0.852346		0.842093		0.854314		0.83841
	0.0339			0.852608		0.84246		0.85459		0.838734
	0.034			0.852867		0.842825		0.854864		0.839057
	0.0341			0.853124		0.843186		0.855135		0.83938
	0.0342			0.85338		0.843546		0.855403		0.839702
	0.0343			0.853635		0.843904		0.855672		0.840019
	0.0344			0.853886		0.844261		0.855939		0.840336
	0.0345			0.854136		0.844616		0.856204		0.84065
	0.0346			0.854385		0.84497		0.856468		0.840963
	0.0347			0.854632		0.84532		0.856729		0.841276
	0.0348			0.85488		0.845667		0.856988		0.841588
	0.0349			0.855126		0.846015		0.857248		0.841899
	0.035			0.855371		0.846364		0.857507		0.842207
	0.0351			0.855614		0.84671		0.857765		0.842513
	0.0352			0.855856		0.847053		0.858021		0.84282
	0.0353			0.856097		0.847392		0.858276		0.843124
	0.0354			0.856338		0.847732		0.858531		0.843425
	0.0355			0.856577		0.848069		0.858783		0.843728
	0.0356			0.856814		0.848403		0.859035		0.844031
	0.0357			0.857051		0.848738		0.859286		0.844333
	0.0358			0.857285		0.84907		0.859533		0.844633
	0.0359			0.857519		0.849402		0.85978		0.84493
	0.036			0.85775		0.849733		0.860025		0.845227
	0.0361			0.857981		0.850059		0.860269		0.845524
	0.0362			0.858211		0.850385		0.860512		0.84582
	0.0363			0.85844		0.850709		0.860754		0.846114
	0.0364			0.858668		0.851031		0.860995		0.846406
	0.0365			0.858896		0.851351		0.861234		0.846699
	0.0366			0.85912		0.851669		0.861472		0.84699
	0.0367			0.859344		0.851987		0.861708		0.847279
	0.0368			0.859568		0.852301		0.861942		0.847568
	0.0369			0.859789		0.852612		0.862176		0.847855
	0.037			0.860007		0.852923		0.862409		0.84814
	0.0371			0.860226		0.853233		0.862642		0.848425
	0.0372			0.860445		0.853542		0.862872		0.848711
	0.0373			0.860661		0.853848		0.863102		0.848992
	0.0374			0.860877		0.854152		0.863331		0.849272
	0.0375			0.861092		0.854456		0.863559		0.849552
	0.0376			0.861304		0.854757		0.863787		0.849831
	0.0377			0.861513		0.855057		0.864014		0.850108
	0.0378			0.861723		0.855355		0.86424		0.850386
	0.0379			0.861931		0.855654		0.864463		0.850662
	0.038			0.862139		0.855947		0.864684		0.850937
	0.0381			0.862346		0.856238		0.864906		0.85121
	0.0382			0.862549		0.856529		0.865128		0.851481
	0.0383			0.862751		0.856819		0.865348		0.851749
	0.0384			0.862952		0.857106		0.865566		0.852016
	0.0385			0.863155		0.85739		0.865784		0.852279
	0.0386			0.863355		0.857672		0.866		0.852541
	0.0387			0.863555		0.857954		0.866216		0.852802
	0.0388			0.863752		0.858234		0.866431		0.85306
	0.0389			0.86395		0.858513		0.866645		0.853318
	0.039			0.864147		0.858792		0.866859		0.853573
	0.0391			0.864344		0.859071		0.86707		0.853829
	0.0392			0.864538		0.859346		0.86728		0.854085
	0.0393			0.864733		0.859618		0.86749		0.85434
	0.0394			0.864928		0.859891		0.8677		0.854593
	0.0395			0.86512		0.860161		0.86791		0.854843
	0.0396			0.865312		0.86043		0.868117		0.855091
	0.0397			0.865504		0.860697		0.868322		0.85534
	0.0398			0.865697		0.860965		0.868527		0.855588
	0.0399			0.865887		0.861233		0.868731		0.855835
	0.04			0.866075		0.8615		0.868935		0.856081
	0.0401			0.866264		0.861762		0.869137		0.856325
	0.0402			0.866452		0.862023		0.869338		0.856568
	0.0403			0.866638		0.862284		0.869538		0.856812
	0.0404			0.866824		0.862541		0.869735		0.857053
	0.0405			0.86701		0.8628		0.869933		0.857294
	0.0406			0.867195		0.863058		0.87013		0.857533
	0.0407			0.867379		0.863316		0.870327		0.85777
	0.0408			0.867562		0.863572		0.870521		0.858007
	0.0409			0.867744		0.863828		0.870714		0.858244
	0.041			0.867924		0.864082		0.870905		0.858479
	0.0411			0.868103		0.864337		0.871096		0.858713
	0.0412			0.868282		0.864591		0.871286		0.858945
	0.0413			0.86846		0.864845		0.871475		0.859175
	0.0414			0.868638		0.865097		0.871662		0.859404
	0.0415			0.868816		0.865349		0.87185		0.859633
	0.0416			0.868994		0.865601		0.872038		0.859862
	0.0417			0.869171		0.865848		0.872223		0.860087
	0.0418			0.869345		0.866096		0.87241		0.860313
	0.0419			0.869519		0.866345		0.872595		0.860537
	0.042			0.869693		0.86659		0.872777		0.86076
	0.0421			0.869868		0.866834		0.872958		0.860983
	0.0422			0.87004		0.867076		0.873139		0.861204
	0.0423			0.870212		0.867316		0.873318		0.861423
	0.0424			0.870382		0.867558		0.873496		0.861641
	0.0425			0.870553		0.867797		0.873674		0.86186
	0.0426			0.870721		0.868034		0.87385		0.862079
	0.0427			0.870888		0.868271		0.874025		0.862296
	0.0428			0.871055		0.868505		0.874201		0.862515
	0.0429			0.871222		0.868739		0.874377		0.862733
	0.043			0.871388		0.868972		0.87455		0.862948
	0.0431			0.871553		0.869204		0.874724		0.863161
	0.0432			0.871717		0.869435		0.8749		0.863372
	0.0433			0.871881		0.869668		0.875073		0.863583
	0.0434			0.872046		0.869899		0.875247		0.863796
	0.0435			0.872209		0.87013		0.875421		0.864008
	0.0436			0.872373		0.870361		0.875595		0.86422
	0.0437			0.872534		0.87059		0.875768		0.864433
	0.0438			0.872693		0.870818		0.875939		0.864644
	0.0439			0.872851		0.871046		0.876109		0.864854
	0.044			0.87301		0.871275		0.876279		0.865063
	0.0441			0.873169		0.871499		0.876448		0.86527
	0.0442			0.873326		0.871722		0.876616		0.865477
	0.0443			0.873482		0.871943		0.876782		0.865684
	0.0444			0.873639		0.872167		0.876949		0.86589
	0.0445			0.873796		0.872387		0.877115		0.866097
	0.0446			0.873952		0.872605		0.87728		0.866303
	0.0447			0.874105		0.872825		0.877445		0.866506
	0.0448			0.874258		0.873043		0.877609		0.866708
	0.0449			0.87441		0.873256		0.877771		0.866909
	0.045			0.874563		0.873469		0.877933		0.867111
	0.0451			0.874713		0.873681		0.878095		0.867309
	0.0452			0.874864		0.873894		0.878255		0.867506
	0.0453			0.875014		0.874105		0.878416		0.867706
	0.0454			0.875163		0.874313		0.878575		0.867906
	0.0455			0.875312		0.874521		0.878734		0.868105
	0.0456			0.875461		0.874729		0.878894		0.868305
	0.0457			0.875609		0.874938		0.879054		0.868504
	0.0458			0.875757		0.875148		0.879215		0.868703
	0.0459			0.875905		0.875358		0.879374		0.868903
	0.046			0.876052		0.875564		0.879534		0.869103
	0.0461			0.876199		0.875771		0.879692		0.869302
	0.0462			0.876347		0.875977		0.87985		0.869498
	0.0463			0.876493		0.876183		0.880007		0.869695
	0.0464			0.876639		0.876389		0.880162		0.86989
	0.0465			0.876783		0.876591		0.880317		0.870084
	0.0466			0.876928		0.876793		0.880473		0.87028
	0.0467			0.877071		0.876995		0.880629		0.870473
	0.0468			0.877213		0.877197		0.880785		0.870665
	0.0469			0.877355		0.877398		0.880941		0.870858
	0.047			0.877496		0.8776		0.881098		0.87105
	0.0471			0.877637		0.877799		0.881253		0.871243
	0.0472			0.877779		0.877997		0.881408		0.871439
	0.0473			0.877919		0.878195		0.881562		0.871633
	0.0474			0.878058		0.878391		0.881715		0.871826
	0.0475			0.878197		0.878587		0.881869		0.872016
	0.0476			0.878335		0.878784		0.882022		0.872208
	0.0477			0.878473		0.878979		0.882175		0.872399
	0.0478			0.87861		0.879173		0.882327		0.87259
	0.0479			0.878745		0.879369		0.882479		0.87278
	0.048			0.87888		0.879563		0.88263		0.872969
	0.0481			0.879013		0.879754		0.88278		0.873156
	0.0482			0.879145		0.879944		0.882929		0.873346
	0.0483			0.879276		0.880135		0.883079		0.873533
	0.0484			0.879407		0.880328		0.883228		0.87372
	0.0485			0.879537		0.880519		0.883375		0.873906
	0.0486			0.879667		0.880708		0.883522		0.87409
	0.0487			0.879795		0.880897		0.883667		0.874274
	0.0488			0.879923		0.881086		0.883812		0.874457
	0.0489			0.880052		0.881276		0.883956		0.874638
	0.049			0.880178		0.881464		0.884098		0.87482
	0.0491			0.880305		0.881649		0.88424		0.875002
	0.0492			0.880433		0.881832		0.884383		0.875184
	0.0493			0.88056		0.882015		0.884528		0.875361
	0.0494			0.880687		0.882198		0.88467		0.875538
	0.0495			0.880813		0.88238		0.884813		0.875715
	0.0496			0.880938		0.882561		0.884954		0.875892
	0.0497			0.881062		0.882743		0.885096		0.876068
	0.0498			0.881189		0.882923		0.885237		0.876243
	0.0499			0.881317		0.883102		0.885378		0.876419
	0.05			0.881444		0.883281		0.885518		0.876593
	0.0501			0.88157		0.883459		0.885658		0.876765
	0.0502			0.881696		0.883637		0.885797		0.876936
	0.0503			0.881822		0.883814		0.885937		0.877106
	0.0504			0.881949		0.883988		0.886076		0.877276
	0.0505			0.882074		0.884161		0.886213		0.877447
	0.0506			0.882198		0.884334		0.886351		0.877618
	0.0507			0.882322		0.884505		0.886487		0.877788
	0.0508			0.882445		0.884678		0.886623		0.877959
	0.0509			0.882569		0.884848		0.886759		0.878131
	0.051			0.882693		0.885016		0.886894		0.878302
	0.0511			0.882816		0.885185		0.887028		0.878473
	0.0512			0.882938		0.885354		0.887162		0.878644
	0.0513			0.883059		0.885518		0.887295		0.878816
	0.0514			0.883182		0.885684		0.887428		0.878987
	0.0515			0.883305		0.885848		0.887559		0.879154
	0.0516			0.883427		0.88601		0.887689		0.879321
	0.0517			0.883547		0.886174		0.887819		0.879487
	0.0518			0.883667		0.886336		0.887949		0.879654
	0.0519			0.883787		0.886496		0.888078		0.879821
	0.052			0.883907		0.886653		0.888208		0.879988
	0.0521			0.884026		0.886812		0.888338		0.880155
	0.0522			0.884143		0.886972		0.888467		0.880321
	0.0523			0.884262		0.887131		0.888595		0.880486
	0.0524			0.884379		0.887289		0.888723		0.880649
	0.0525			0.884495		0.887447		0.888849		0.88081
	0.0526			0.884612		0.887607		0.888977		0.880969
	0.0527			0.884729		0.887764		0.889105		0.88113
	0.0528			0.884846		0.887919		0.889231		0.881291
	0.0529			0.884961		0.888074		0.889356		0.881452
	0.053			0.885077		0.888231		0.889483		0.881614
	0.0531			0.885192		0.888386		0.889607		0.881775
	0.0532			0.885307		0.888537		0.889732		0.881936
	0.0533			0.885422		0.888692		0.889857		0.882098
	0.0534			0.885535		0.888843		0.889983		0.882259
	0.0535			0.885648		0.888995		0.89011		0.88242
	0.0536			0.885761		0.889146		0.890237		0.882581
	0.0537			0.885874		0.889299		0.890362		0.882742
	0.0538			0.885988		0.889451		0.890488		0.882904
	0.0539			0.8861		0.889601		0.890614		0.883063
	0.054			0.886212		0.889752		0.890739		0.88322
	0.0541			0.886324		0.889904		0.890863		0.883377
	0.0542			0.886435		0.890055		0.890986		0.883536
	0.0543			0.886547		0.890208		0.891109		0.883692
	0.0544			0.88666		0.890361		0.891231		0.883852
	0.0545			0.886771		0.890512		0.891354		0.88401
	0.0546			0.886882		0.890663		0.891477		0.884167
	0.0547			0.886991		0.890814		0.8916		0.884324
	0.0548			0.887099		0.890967		0.891723		0.884481
	0.0549			0.887209		0.891121		0.891845		0.884638
	0.055			0.88732		0.891272		0.891966		0.884795
	0.0551			0.88743		0.891421		0.892088		0.88495
	0.0552			0.88754		0.89157		0.892209		0.885105
	0.0553			0.88765		0.891719		0.892329		0.885261
	0.0554			0.887759		0.891867		0.892448		0.885415
	0.0555			0.887868		0.892016		0.892569		0.885568
	0.0556			0.887977		0.892164		0.892688		0.88572
	0.0557			0.888084		0.892309		0.892808		0.885869
	0.0558			0.888193		0.892453		0.892927		0.886018
	0.0559			0.888301		0.892597		0.893045		0.886168
	0.056			0.888408		0.892743		0.893165		0.886317
	0.0561			0.888514		0.892888		0.893284		0.886462
	0.0562			0.88862		0.89303		0.893404		0.886609
	0.0563			0.888727		0.893172		0.893522		0.886755
	0.0564			0.888832		0.893315		0.89364		0.8869
	0.0565			0.888936		0.893456		0.893758		0.887043
	0.0566			0.889039		0.893597		0.893874		0.887185
	0.0567			0.889143		0.893737		0.893991		0.887325
	0.0568			0.889247		0.893875		0.894107		0.887467
	0.0569			0.889351		0.894011		0.894223		0.887608
	0.057			0.889454		0.894149		0.894338		0.88775
	0.0571			0.889558		0.894284		0.894453		0.887891
	0.0572			0.88966		0.894421		0.894567		0.888032
	0.0573			0.889764		0.894556		0.89468		0.888173
	0.0574			0.889868		0.894692		0.894794		0.888311
	0.0575			0.88997		0.894827		0.894906		0.88845
	0.0576			0.890074		0.894963		0.89502		0.888589
	0.0577			0.890177		0.895097		0.895134		0.888726
	0.0578			0.890279		0.895228		0.895249		0.888862
	0.0579			0.89038		0.895361		0.895362		0.889
	0.058			0.89048		0.895492		0.895477		0.889141
	0.0581			0.890578		0.895624		0.895592		0.88928
	0.0582			0.890676		0.895756		0.895705		0.889418
	0.0583			0.890777		0.89589		0.895818		0.889555
	0.0584			0.890876		0.896023		0.895932		0.889692
	0.0585			0.890974		0.896156		0.896046		0.889828
	0.0586			0.891073		0.896288		0.89616		0.889965
	0.0587			0.891174		0.89642		0.896274		0.890103
	0.0588			0.891274		0.896552		0.896387		0.890239
	0.0589			0.891373		0.896685		0.896503		0.890373
	0.059			0.891472		0.896819		0.896618		0.890509
	0.0591			0.891572		0.89695		0.896732		0.890645
	0.0592			0.891673		0.897079		0.896845		0.890779
	0.0593			0.891773		0.897211		0.896957		0.890912
	0.0594			0.891871		0.897343		0.897067		0.891046
	0.0595			0.891969		0.897471		0.897178		0.891181
	0.0596			0.892067		0.8976		0.89729		0.891315
	0.0597			0.892166		0.89773		0.897402		0.891449
	0.0598			0.892264		0.897859		0.897513		0.891584
	0.0599			0.892363		0.897987		0.897622		0.891718
	0.06			0.892461		0.898115		0.89773		0.891853
	0.0601			0.892558		0.898244		0.897839		0.891988
	0.0602			0.892655		0.898375		0.897949		0.892123
	0.0603			0.892752		0.898507		0.898059		0.892255
	0.0604			0.892849		0.898636		0.898169		0.892389
	0.0605			0.892947		0.898764		0.898279		0.892525
	0.0606			0.893043		0.898892		0.898389		0.892658
	0.0607			0.89314		0.899019		0.898499		0.89279
	0.0608			0.893238		0.899147		0.898608		0.892921
	0.0609			0.893334		0.899277		0.898716		0.893053
	0.061			0.893429		0.899408		0.898824		0.893185
	0.0611			0.893525		0.899537		0.898932		0.893317
	0.0612			0.893621		0.899666		0.899038		0.893448
	0.0613			0.893719		0.899793		0.899145		0.893577
	0.0614			0.893816		0.89992		0.89925		0.893706
	0.0615			0.893911		0.900047		0.899356		0.893836
	0.0616			0.894008		0.900173		0.899463		0.893968
	0.0617			0.894106		0.900298		0.89957		0.894098
	0.0618			0.894203		0.900425		0.899674		0.894227
	0.0619			0.894299		0.90055		0.899777		0.894357
	0.062			0.894394		0.900674		0.899881		0.894487
	0.0621			0.89449		0.900801		0.899985		0.894617
	0.0622			0.894584		0.900925		0.900089		0.894748
	0.0623			0.894678		0.901048		0.900195		0.89488
	0.0624			0.894772		0.901173		0.9003		0.895014
	0.0625			0.894864		0.901298		0.900406		0.895144
	0.0626			0.894957		0.90142		0.900511		0.895273
	0.0627			0.89505		0.901543		0.900617		0.895404
	0.0628			0.895141		0.901664		0.90072		0.895531
	0.0629			0.895234		0.901788		0.900823		0.895661
	0.063			0.895325		0.90191		0.900926		0.895791
	0.0631			0.895415		0.902032		0.901029		0.895921
	0.0632			0.895506		0.90215		0.901132		0.89605
	0.0633			0.895597		0.902269		0.901235		0.89618
	0.0634			0.895686		0.902392		0.901338		0.89631
	0.0635			0.895775		0.90251		0.90144		0.89644
	0.0636			0.895864		0.902627		0.901543		0.89657
	0.0637			0.895953		0.902745		0.901644		0.896699
	0.0638			0.89604		0.902864		0.901746		0.896827
	0.0639			0.896128		0.902986		0.901848		0.896956
	0.064			0.896214		0.903103		0.901948		0.897087
	0.0641			0.8963		0.90322		0.90205		0.897217
	0.0642			0.896386		0.90334		0.902151		0.897347
	0.0643			0.896474		0.903458		0.902251		0.897476
	0.0644			0.896561		0.903577		0.902351		0.897606
	0.0645			0.896647		0.903698		0.902452		0.897734
	0.0646			0.896732		0.903817		0.902551		0.897861
	0.0647			0.896817		0.903935		0.90265		0.897986
	0.0648			0.896903		0.904052		0.90275		0.898113
	0.0649			0.896987		0.90417		0.902849		0.898239
	0.065			0.897071		0.904286		0.902949		0.898362
	0.0651			0.897157		0.904403		0.903048		0.898485
	0.0652			0.897242		0.904519		0.903147		0.898609
	0.0653			0.897327		0.904632		0.903245		0.898731
	0.0654			0.897411		0.904746		0.903344		0.898851
	0.0655			0.897496		0.904861		0.903443		0.89897
	0.0656			0.897578		0.904978		0.903541		0.89909
	0.0657			0.897661		0.905095		0.903639		0.899208
	0.0658			0.897744		0.905213		0.903739		0.899329
	0.0659			0.897827		0.90533		0.903836		0.89945
	0.066			0.89791		0.905446		0.903935		0.899571
	0.0661			0.897994		0.905564		0.904034		0.899691
	0.0662			0.898077		0.905681		0.904133		0.89981
	0.0663			0.89816		0.905798		0.90423		0.89993
	0.0664			0.898243		0.905916		0.904327		0.900051
	0.0665			0.898328		0.906032		0.904424		0.900171
	0.0666			0.898413		0.906146		0.904521		0.900291
	0.0667			0.898498		0.906263		0.904616		0.900409
	0.0668			0.898582		0.906376		0.90471		0.900527
	0.0669			0.898665		0.906489		0.904805		0.900647
	0.067			0.898747		0.906602		0.9049		0.900765
	0.0671			0.898828		0.906716		0.904996		0.900884
	0.0672			0.898912		0.90683		0.905091		0.901005
	0.0673			0.898997		0.906939		0.905188		0.901125
	0.0674			0.899081		0.907049		0.905285		0.901245
	0.0675			0.899162		0.907159		0.90538		0.901364
	0.0676			0.899243		0.90727		0.905476		0.901484
	0.0677			0.899324		0.907381		0.905573		0.901604
	0.0678			0.899405		0.907491		0.905668		0.901722
	0.0679			0.899486		0.907603		0.905761		0.90184
	0.068			0.899567		0.907714		0.905858		0.901959
	0.0681			0.899648		0.907825		0.905954		0.902076
	0.0682			0.89973		0.907935		0.906049		0.902195
	0.0683			0.899812		0.908046		0.906141		0.902314
	0.0684			0.899893		0.908158		0.906235		0.902432
	0.0685			0.899974		0.908269		0.906328		0.902549
	0.0686			0.900055		0.90838		0.90642		0.902666
	0.0687			0.900136		0.908492		0.906515		0.902783
	0.0688			0.900216		0.908604		0.906609		0.902898
	0.0689			0.900296		0.908714		0.906703		0.903013
	0.069			0.900376		0.908823		0.906795		0.903127
	0.0691			0.900455		0.908933		0.906889		0.903239
	0.0692			0.900536		0.909043		0.906984		0.903351
	0.0693			0.900618		0.909153		0.907077		0.903465
	0.0694			0.900699		0.909263		0.907169		0.903578
	0.0695			0.900779		0.909372		0.907261		0.903693
	0.0696			0.900859		0.909481		0.907355		0.903811
	0.0697			0.90094		0.90959		0.907448		0.903924
	0.0698			0.90102		0.909699		0.907539		0.904038
	0.0699			0.9011		0.909809		0.90763		0.904151
	0.07			0.901179		0.909917		0.907722		0.904265
	0.0701			0.901259		0.910025		0.907814		0.90438
	0.0702			0.901338		0.910134		0.907904		0.904495
	0.0703			0.901416		0.910241		0.907994		0.904608
	0.0704			0.901496		0.910347		0.908085		0.904721
	0.0705			0.901574		0.910455		0.908176		0.904832
	0.0706			0.901652		0.910565		0.908266		0.904944
	0.0707			0.901729		0.910673		0.908355		0.905057
	0.0708			0.901809		0.910779		0.908446		0.905168
	0.0709			0.901887		0.910884		0.908536		0.905278
	0.071			0.901964		0.910991		0.908628		0.905385
	0.0711			0.902042		0.911095		0.908718		0.905493
	0.0712			0.90212		0.911198		0.908807		0.905603
	0.0713			0.902199		0.9113		0.908899		0.905711
	0.0714			0.902279		0.911404		0.908991		0.905819
	0.0715			0.902361		0.911508		0.909082		0.905925
	0.0716			0.902442		0.91161		0.909173		0.906034
	0.0717			0.902522		0.911712		0.909264		0.906141
	0.0718			0.902601		0.911813		0.909354		0.90625
	0.0719			0.902681		0.911915		0.909443		0.90636
	0.072			0.902759		0.912014		0.909532		0.906467
	0.0721			0.902836		0.912115		0.909619		0.906573
	0.0722			0.902914		0.912216		0.909706		0.906682
	0.0723			0.902993		0.912318		0.909794		0.90679
	0.0724			0.90307		0.912421		0.909883		0.906899
	0.0725			0.903148		0.912524		0.909971		0.90701
	0.0726			0.903225		0.912627		0.91006		0.907122
	0.0727			0.903302		0.91273		0.910149		0.90723
	0.0728			0.903378		0.912832		0.910238		0.907337
	0.0729			0.903455		0.912932		0.910326		0.907443
	0.073			0.903533		0.913028		0.910414		0.907551
	0.0731			0.903609		0.913127		0.910502		0.907658
	0.0732			0.903684		0.913225		0.910593		0.907767
	0.0733			0.903758		0.913323		0.910681		0.907874
	0.0734			0.903832		0.91342		0.910767		0.907981
	0.0735			0.903906		0.913516		0.910853		0.90809
	0.0736			0.90398		0.913613		0.910942		0.908199
	0.0737			0.904053		0.913711		0.911028		0.908308
	0.0738			0.904127		0.913807		0.911115		0.908417
	0.0739			0.904203		0.913903		0.911201		0.908525
	0.074			0.904276		0.913999		0.911286		0.908634
	0.0741			0.904348		0.914095		0.911373		0.908741
	0.0742			0.904419		0.914189		0.911457		0.908849
	0.0743			0.904493		0.914283		0.911541		0.908958
	0.0744			0.904566		0.914377		0.911626		0.909065
	0.0745			0.904636		0.914471		0.911708		0.909171
	0.0746			0.904707		0.914567		0.91179		0.909277
	0.0747			0.904778		0.914662		0.911875		0.909384
	0.0748			0.904849		0.914756		0.91196		0.909492
	0.0749			0.904919		0.914849		0.912043		0.909602
	0.075			0.90499		0.914942		0.912127		0.909713
	0.0751			0.90506		0.915033		0.912211		0.909824
	0.0752			0.90513		0.915122		0.912296		0.909934
	0.0753			0.905201		0.915214		0.91238		0.910044
	0.0754			0.905272		0.915305		0.912464		0.910154
	0.0755			0.905341		0.915397		0.912548		0.910264
	0.0756			0.905412		0.915489		0.912631		0.910373
	0.0757			0.905483		0.915583		0.912716		0.910482
	0.0758			0.905554		0.915676		0.912799		0.910589
	0.0759			0.905624		0.91577		0.912882		0.910695
	0.076			0.905694		0.915864		0.912965		0.9108
	0.0761			0.905765		0.915959		0.913049		0.910905
	0.0762			0.905837		0.916055		0.913132		0.911011
	0.0763			0.905907		0.91615		0.913214		0.911115
	0.0764			0.905976		0.916247		0.913296		0.911221
	0.0765			0.906047		0.916343		0.913378		0.911327
	0.0766			0.906116		0.916439		0.913458		0.911433
	0.0767			0.906186		0.916536		0.91354		0.911538
	0.0768			0.906256		0.916632		0.913622		0.911641
	0.0769			0.906326		0.916725		0.913703		0.911744
	0.077			0.906396		0.916821		0.913784		0.911849
	0.0771			0.906467		0.916917		0.913867		0.911952
	0.0772			0.906539		0.91701		0.913948		0.912053
	0.0773			0.906608		0.917105		0.914028		0.912155
	0.0774			0.906676		0.917199		0.91411		0.912258
	0.0775			0.906747		0.917293		0.914192		0.912362
	0.0776			0.906817		0.917388		0.914273		0.912466
	0.0777			0.906886		0.91748		0.914354		0.912572
	0.0778			0.906954		0.917571		0.914435		0.912676
	0.0779			0.907024		0.917663		0.914515		0.91278
	0.078			0.907094		0.917755		0.914593		0.912887
	0.0781			0.907163		0.917846		0.914671		0.912993
	0.0782			0.907231		0.917937		0.91475		0.913099
	0.0783			0.907298		0.91803		0.914829		0.913203
	0.0784			0.907367		0.918121		0.914906		0.913308
	0.0785			0.907435		0.918213		0.914983		0.913412
	0.0786			0.907503		0.918307		0.915061		0.913512
	0.0787			0.90757		0.918398		0.915138		0.913614
	0.0788			0.907638		0.918489		0.915216		0.913715
	0.0789			0.907706		0.918581		0.915292		0.913816
	0.079			0.907774		0.918671		0.915368		0.913915
	0.0791			0.907841		0.918761		0.915443		0.914016
	0.0792			0.907908		0.918854		0.915519		0.914118
	0.0793			0.907975		0.918948		0.915597		0.914221
	0.0794			0.908042		0.919039		0.915674		0.914323
	0.0795			0.908109		0.919131		0.91575		0.914425
	0.0796			0.908175		0.919222		0.915826		0.914525
	0.0797			0.908241		0.919311		0.915901		0.914626
	0.0798			0.908309		0.919401		0.915976		0.914727
	0.0799			0.908376		0.919496		0.916053		0.914827
	0.08			0.908443		0.919589		0.91613		0.914929
	0.0801			0.90851		0.919679		0.916206		0.915032
	0.0802			0.908577		0.919774		0.916281		0.915132
	0.0803			0.908643		0.919869		0.916356		0.915231
	0.0804			0.908707		0.919961		0.916431		0.915332
	0.0805			0.908772		0.920052		0.916505		0.915432
	0.0806			0.908838		0.920142		0.91658		0.915531
	0.0807			0.908904		0.920232		0.916653		0.915631
	0.0808			0.908967		0.920322		0.916726		0.915732
	0.0809			0.909031		0.920412		0.9168		0.915828
	0.081			0.909096		0.920503		0.916871		0.915925
	0.0811			0.909163		0.920594		0.916942		0.916024
	0.0812			0.90923		0.920686		0.917012		0.916122
	0.0813			0.909295		0.920778		0.917083		0.916218
	0.0814			0.909361		0.920866		0.917155		0.916318
	0.0815			0.909429		0.920955		0.917227		0.916417
	0.0816			0.909497		0.921046		0.917298		0.916515
	0.0817			0.909563		0.921133		0.917371		0.916613
	0.0818			0.909629		0.921218		0.917443		0.916711
	0.0819			0.909695		0.921305		0.917513		0.91681
	0.082			0.909763		0.921389		0.917584		0.916909
	0.0821			0.909829		0.921473		0.917655		0.917008
	0.0822			0.909895		0.921558		0.917725		0.917106
	0.0823			0.909962		0.921641		0.917793		0.917204
	0.0824			0.910027		0.921724		0.917863		0.917302
	0.0825			0.910093		0.92181		0.917934		0.917403
	0.0826			0.910159		0.921894		0.918006		0.917502
	0.0827			0.910226		0.921979		0.918078		0.917599
	0.0828			0.910292		0.922062		0.91815		0.917697
	0.0829			0.910358		0.922146		0.918221		0.917795
	0.083			0.910424		0.922234		0.918292		0.91789
	0.0831			0.910489		0.922319		0.918364		0.917988
	0.0832			0.910557		0.922406		0.918436		0.918086
	0.0833			0.910623		0.922491		0.918506		0.918184
	0.0834			0.910689		0.922579		0.918577		0.918283
	0.0835			0.910756		0.922667		0.918648		0.918381
	0.0836			0.910824		0.922756		0.91872		0.918478
	0.0837			0.910889		0.922843		0.918791		0.918576
	0.0838			0.910954		0.922932		0.918862		0.918674
	0.0839			0.911022		0.92302		0.918933		0.918769
	0.084			0.91109		0.92311		0.919005		0.918865
	0.0841			0.911156		0.923196		0.919076		0.918962
	0.0842			0.911222		0.923284		0.919146		0.91906
	0.0843			0.911288		0.923372		0.919216		0.919156
	0.0844			0.911354		0.92346		0.919286		0.919251
	0.0845			0.91142		0.923546		0.919354		0.919348
	0.0846			0.911486		0.923633		0.919422		0.919442
	0.0847			0.911551		0.923721		0.919491		0.919535
	0.0848			0.911616		0.923807		0.91956		0.919627
	0.0849			0.911681		0.923893		0.919628		0.91972
	0.085			0.911746		0.923978		0.919695		0.919812
	0.0851			0.911811		0.924064		0.919763		0.919904
	0.0852			0.911876		0.924148		0.91983		0.919994
	0.0853			0.911941		0.924231		0.919899		0.920087
	0.0854			0.912005		0.924314		0.919967		0.920177
	0.0855			0.912069		0.924396		0.920035		0.920266
	0.0856			0.912133		0.924479		0.920103		0.920356
	0.0857			0.912196		0.924561		0.920171		0.920445
	0.0858			0.91226		0.924645		0.92024		0.920534
	0.0859			0.912323		0.924728		0.920308		0.920626
	0.086			0.912387		0.924809		0.920377		0.920717
	0.0861			0.912451		0.924891		0.920445		0.920806
	0.0862			0.912514		0.924974		0.920512		0.920895
	0.0863			0.912576		0.925057		0.920581		0.920986
	0.0864			0.912639		0.925139		0.92065		0.921077
	0.0865			0.9127		0.925221		0.920717		0.921165
	0.0866			0.912762		0.925303		0.920784		0.921255
	0.0867			0.912826		0.925387		0.920854		0.921345
	0.0868			0.91289		0.92547		0.920922		0.921437
	0.0869			0.912953		0.92555		0.920989		0.921527
	0.087			0.913014		0.925635		0.921057		0.921616
	0.0871			0.913076		0.925719		0.921125		0.921705
	0.0872			0.913138		0.925802		0.921192		0.921793
	0.0873			0.913202		0.925886		0.921259		0.921881
	0.0874			0.913263		0.92597		0.921326		0.921968
	0.0875			0.913325		0.926051		0.921393		0.922057
	0.0876			0.913384		0.926132		0.92146		0.922146
	0.0877			0.913444		0.926212		0.921528		0.922235
	0.0878			0.913506		0.926295		0.921596		0.922322
	0.0879			0.913566		0.926377		0.921664		0.922408
	0.088			0.913628		0.926457		0.92173		0.922493
	0.0881			0.913688		0.926539		0.921797		0.922579
	0.0882			0.913748		0.92662		0.921864		0.922667
	0.0883			0.913807		0.926701		0.921931		0.922753
	0.0884			0.913868		0.926781		0.921999		0.922838
	0.0885			0.913928		0.926861		0.922067		0.922925
	0.0886			0.913989		0.926941		0.922134		0.923008
	0.0887			0.91405		0.92702		0.9222		0.923091
	0.0888			0.914112		0.927101		0.922266		0.923174
	0.0889			0.914172		0.927178		0.922332		0.92326
	0.089			0.914233		0.927257		0.922396		0.923344
	0.0891			0.914293		0.927335		0.922462		0.923426
	0.0892			0.914354		0.927413		0.922527		0.923509
	0.0893			0.914414		0.927487		0.922592		0.923591
	0.0894			0.914473		0.927561		0.922658		0.923671
	0.0895			0.914533		0.927635		0.922722		0.923752
	0.0896			0.914594		0.927712		0.922786		0.923833
	0.0897			0.914654		0.927788		0.922851		0.923914
	0.0898			0.914712		0.927864		0.922915		0.923996
	0.0899			0.91477		0.927941		0.922979		0.924079
	0.09			0.914829		0.928019		0.923042		0.924163
	0.0901			0.914887		0.928098		0.923106		0.924247
	0.0902			0.914946		0.928176		0.923168		0.92433
	0.0903			0.915003		0.928251		0.923231		0.924413
	0.0904			0.915061		0.928329		0.923295		0.924497
	0.0905			0.915119		0.928409		0.923359		0.92458
	0.0906			0.915178		0.928489		0.923422		0.924666
	0.0907			0.915237		0.928568		0.923484		0.924751
	0.0908			0.915297		0.928649		0.923547		0.924835
	0.0909			0.915356		0.928728		0.923612		0.924918
	0.091			0.915415		0.928809		0.923674		0.925003
	0.0911			0.915474		0.92889		0.923737		0.92509
	0.0912			0.915532		0.928969		0.923799		0.925177
	0.0913			0.91559		0.929051		0.923864		0.925265
	0.0914			0.915648		0.92913		0.923929		0.925351
	0.0915			0.915705		0.929211		0.923994		0.925437
	0.0916			0.915763		0.92929		0.924056		0.925524
	0.0917			0.91582		0.929367		0.924119		0.92561
	0.0918			0.915878		0.929445		0.924183		0.925697
	0.0919			0.915935		0.929525		0.924246		0.925785
	0.092			0.915993		0.929602		0.924309		0.925873
	0.0921			0.916051		0.929679		0.924373		0.925961
	0.0922			0.916108		0.929758		0.924434		0.926048
	0.0923			0.916165		0.929837		0.924497		0.926134
	0.0924			0.916222		0.929915		0.924561		0.926219
	0.0925			0.916278		0.929991		0.924625		0.926304
	0.0926			0.916334		0.930067		0.924689		0.926392
	0.0927			0.91639		0.930145		0.924752		0.926479
	0.0928			0.916447		0.930221		0.924815		0.926566
	0.0929			0.916504		0.930296		0.924879		0.926652
	0.093			0.916562		0.930371		0.924944		0.926738
	0.0931			0.916621		0.930446		0.925009		0.926822
	0.0932			0.916679		0.930522		0.925075		0.926907
	0.0933			0.916737		0.930598		0.92514		0.926991
	0.0934			0.916794		0.930672		0.925203		0.927074
	0.0935			0.916852		0.930746		0.925266		0.927157
	0.0936			0.916909		0.93082		0.925329		0.92724
	0.0937			0.916967		0.930894		0.925393		0.927322
	0.0938			0.917023		0.930968		0.925455		0.927404
	0.0939			0.917082		0.931042		0.925518		0.927487
	0.094			0.917139		0.931117		0.925582		0.927569
	0.0941			0.917196		0.931191		0.925645		0.927651
	0.0942			0.917252		0.931263		0.925708		0.927732
	0.0943			0.917308		0.931337		0.925773		0.927815
	0.0944			0.917365		0.931409		0.925837		0.927897
	0.0945			0.91742		0.93148		0.925899		0.927979
	0.0946			0.917475		0.931554		0.925963		0.928059
	0.0947			0.91753		0.93163		0.926026		0.928138
	0.0948			0.917585		0.931701		0.92609		0.928218
	0.0949			0.917639		0.931776		0.926152		0.928298
	0.095			0.917694		0.931852		0.926214		0.928378
	0.0951			0.917749		0.931926		0.926277		0.928456
	0.0952			0.917803		0.931998		0.926339		0.928534
	0.0953			0.917858		0.932068		0.926401		0.928614
	0.0954			0.917912		0.93214		0.926462		0.928693
	0.0955			0.917969		0.932215		0.926524		0.928771
	0.0956			0.918026		0.932287		0.926587		0.928849
	0.0957			0.918083		0.932362		0.926648		0.928928
	0.0958			0.918139		0.932437		0.926709		0.929005
	0.0959			0.918194		0.932513		0.926771		0.929083
	0.096			0.91825		0.932588		0.926833		0.929161
	0.0961			0.918306		0.932664		0.926895		0.929237
	0.0962			0.918363		0.932742		0.926959		0.929315
	0.0963			0.918419		0.93282		0.927021		0.929392
	0.0964			0.918475		0.932894		0.927081		0.929469
	0.0965			0.918533		0.932968		0.927141		0.929546
	0.0966			0.918589		0.933043		0.927201		0.929623
	0.0967			0.918643		0.933122		0.927261		0.929699
	0.0968			0.918701		0.933199		0.927322		0.929775
	0.0969			0.918758		0.933275		0.927381		0.929853
	0.097			0.918814		0.933353		0.927441		0.929931
	0.0971			0.918869		0.933427		0.9275		0.930007
	0.0972			0.918925		0.933503		0.92756		0.930082
	0.0973			0.91898		0.933578		0.92762		0.930158
	0.0974			0.919035		0.933655		0.927681		0.930233
	0.0975			0.919091		0.933731		0.927742		0.930307
	0.0976			0.919147		0.933806		0.927801		0.930382
	0.0977			0.919202		0.933883		0.927859		0.930458
	0.0978			0.919256		0.933958		0.927919		0.930535
	0.0979			0.919311		0.934034		0.927979		0.930612
	0.098			0.919367		0.93411		0.92804		0.930691
	0.0981			0.919421		0.934187		0.9281		0.930769
	0.0982			0.919475		0.934262		0.92816		0.930846
	0.0983			0.919529		0.934339		0.928221		0.930923
	0.0984			0.919583		0.934416		0.928282		0.931001
	0.0985			0.919636		0.934493		0.928343		0.931079
	0.0986			0.91969		0.934568		0.928403		0.931156
	0.0987			0.919744		0.934642		0.928462		0.931233
	0.0988			0.919798		0.934717		0.928525		0.93131
	0.0989			0.919851		0.934792		0.928586		0.931388
	0.099			0.919907		0.934867		0.928645		0.931466
	0.0991			0.919962		0.934942		0.928704		0.931544
	0.0992			0.920015		0.935016		0.928764		0.931622
	0.0993			0.920069		0.935088		0.928825		0.931699
	0.0994			0.920124		0.935162		0.928886		0.931777
	0.0995			0.920176		0.935239		0.928946		0.931855
	0.0996			0.92023		0.935315		0.929008		0.931932
	0.0997			0.920282		0.93539		0.929068		0.93201
	0.0998			0.920334		0.935465		0.929128		0.932089
	0.0999			0.920389		0.935539		0.929189		0.932166
	0.1			0.920443		0.935613		0.929249		0.932239
	0.1001			0.920497		0.935688		0.92931		0.932315
	0.1002			0.920552		0.935761		0.929371		0.932392
	0.1003			0.920606		0.935835		0.929431		0.932468
	0.1004			0.92066		0.935907		0.929491		0.932542
	0.1005			0.920714		0.935982		0.929552		0.932616
	0.1006			0.920767		0.936056		0.929614		0.932688
	0.1007			0.920821		0.936128		0.929674		0.932761
	0.1008			0.920874		0.936201		0.929735		0.932836
	0.1009			0.920927		0.936272		0.929795		0.932909
	0.101			0.92098		0.936342		0.929853		0.932981
	0.1011			0.921033		0.936412		0.929913		0.933053
	0.1012			0.921084		0.936483		0.929974		0.933126
	0.1013			0.921136		0.936553		0.930034		0.933195
	0.1014			0.921189		0.936622		0.930095		0.933268
	0.1015			0.921242		0.936689		0.930156		0.933338
	0.1016			0.921296		0.936757		0.930216		0.933409
	0.1017			0.921348		0.936828		0.930274		0.93348
	0.1018			0.921401		0.936896		0.930335		0.93355
	0.1019			0.921454		0.936964		0.930395		0.933621
	0.102			0.921507		0.937033		0.930456		0.933693
	0.1021			0.921559		0.937103		0.930517		0.933765
	0.1022			0.921612		0.937173		0.930578		0.933835
	0.1023			0.921664		0.937241		0.930639		0.933907
	0.1024			0.921715		0.937311		0.930699		0.933977
	0.1025			0.921767		0.937384		0.93076		0.934048
	0.1026			0.921819		0.937453		0.930822		0.934118
	0.1027			0.921871		0.937523		0.930881		0.934188
	0.1028			0.921924		0.937594		0.930941		0.934257
	0.1029			0.921976		0.937665		0.931001		0.934327
	0.103			0.922027		0.937735		0.931061		0.934396
	0.1031			0.922077		0.937804		0.931122		0.934466
	0.1032			0.922127		0.937874		0.931184		0.934538
	0.1033			0.922179		0.937941		0.931245		0.93461
	0.1034			0.92223		0.93801		0.931307		0.934682
	0.1035			0.922281		0.93808		0.931368		0.934752
	0.1036			0.922332		0.938149		0.931429		0.934824
	0.1037			0.922384		0.938218		0.931489		0.934897
	0.1038			0.922436		0.938288		0.93155		0.934968
	0.1039			0.922487		0.938358		0.931611		0.935038
	0.104			0.922539		0.938427		0.931671		0.935107
	0.1041			0.922589		0.938496		0.931729		0.935176
	0.1042			0.922641		0.938565		0.931787		0.935246
	0.1043			0.922692		0.938634		0.931846		0.935316
	0.1044			0.922744		0.938704		0.931905		0.935383
	0.1045			0.922795		0.938773		0.931962		0.935449
	0.1046			0.922845		0.938842		0.93202		0.935518
	0.1047			0.922896		0.938912		0.932078		0.935586
	0.1048			0.922948		0.938978		0.932134		0.935654
	0.1049			0.922998		0.939045		0.932193		0.935724
	0.105			0.923049		0.939113		0.932252		0.935793
	0.1051			0.923099		0.93918		0.93231		0.935862
	0.1052			0.92315		0.939248		0.932367		0.935931
	0.1053			0.923199		0.939312		0.932424		0.935999
	0.1054			0.923249		0.939379		0.93248		0.936069
	0.1055			0.923298		0.939446		0.932536		0.936141
	0.1056			0.923346		0.939514		0.932594		0.936213
	0.1057			0.923395		0.939585		0.93265		0.936285
	0.1058			0.923444		0.939657		0.932705		0.936357
	0.1059			0.923494		0.939726		0.932761		0.936428
	0.106			0.923543		0.939796		0.932818		0.936499
	0.1061			0.923593		0.939865		0.932874		0.936571
	0.1062			0.923643		0.939933		0.932931		0.936642
	0.1063			0.923692		0.940003		0.932988		0.936714
	0.1064			0.923742		0.94007		0.933043		0.936785
	0.1065			0.923793		0.940137		0.933099		0.936857
	0.1066			0.923843		0.940206		0.933156		0.936927
	0.1067			0.923892		0.940275		0.933213		0.936996
	0.1068			0.92394		0.940342		0.933271		0.937067
	0.1069			0.923989		0.940408		0.933328		0.937138
	0.107			0.924039		0.940473		0.933383		0.937208
	0.1071			0.924087		0.940539		0.933438		0.937276
	0.1072			0.924134		0.940606		0.933494		0.937345
	0.1073			0.924182		0.940671		0.933552		0.937414
	0.1074			0.92423		0.940731		0.933607		0.937483
	0.1075			0.924279		0.940792		0.933662		0.937553
	0.1076			0.924327		0.940855		0.933718		0.937624
	0.1077			0.924375		0.940917		0.933774		0.937694
	0.1078			0.924423		0.940979		0.93383		0.937765
	0.1079			0.924472		0.94104		0.933887		0.937835
	0.108			0.924521		0.941099		0.933944		0.937909
	0.1081			0.924569		0.94116		0.934		0.937982
	0.1082			0.924616		0.941223		0.934055		0.938055
	0.1083			0.924664		0.941285		0.93411		0.938129
	0.1084			0.924712		0.941346		0.934165		0.938203
	0.1085			0.924759		0.941409		0.934221		0.938277
	0.1086			0.924805		0.941469		0.934275		0.938352
	0.1087			0.924851		0.94153		0.934326		0.938424
	0.1088			0.924898		0.941589		0.93438		0.938496
	0.1089			0.924944		0.94165		0.934433		0.938569
	0.109			0.924989		0.941711		0.934485		0.93864
	0.1091			0.925036		0.94177		0.934537		0.93871
	0.1092			0.925083		0.94183		0.934589		0.93878
	0.1093			0.925129		0.94189		0.934642		0.938851
	0.1094			0.925174		0.94195		0.934694		0.938921
	0.1095			0.925221		0.942009		0.934746		0.938993
	0.1096			0.925267		0.942067		0.934798		0.939063
	0.1097			0.925312		0.942126		0.934849		0.939133
	0.1098			0.925356		0.942182		0.9349		0.939203
	0.1099			0.9254		0.94224		0.934951		0.939272
	0.11			0.925446		0.942299		0.935002		0.939341
	0.1101			0.925491		0.942359		0.935052		0.939409
	0.1102			0.925536		0.942418		0.935102		0.939476
	0.1103			0.92558		0.942477		0.935152		0.939554
	0.1104			0.925625		0.942539		0.935204		0.939634
	0.1105			0.925669		0.942599		0.935255		0.939694
	0.1106			0.925713		0.94266		0.935306		0.939756
	0.1107			0.925758		0.942719		0.935356		0.939824
	0.1108			0.925804		0.942779		0.935407		0.939891
	0.1109			0.92585		0.942839		0.935458		0.939957
	0.111			0.925897		0.9429		0.935509		0.940022
	0.1111			0.925942		0.942956		0.93556		0.940088
	0.1112			0.92599		0.943014		0.93561		0.940155
	0.1113			0.926036		0.943073		0.935662		0.940224
	0.1114			0.926082		0.943132		0.935714		0.940292
	0.1115			0.926129		0.943193		0.935763		0.940359
	0.1116			0.926175		0.943251		0.935813		0.940426
	0.1117			0.926222		0.943312		0.935864		0.940492
	0.1118			0.926269		0.943371		0.935916		0.940558
	0.1119			0.926315		0.943429		0.935967		0.940623
	0.112			0.926362		0.94349		0.936018		0.94069
	0.1121			0.926408		0.943552		0.936067		0.940755
	0.1122			0.926456		0.943613		0.936118		0.94082
	0.1123			0.926504		0.943671		0.936168		0.940884
	0.1124			0.92655		0.943732		0.936219		0.940949
	0.1125			0.926596		0.943791		0.93627		0.941013
	0.1126			0.926641		0.943854		0.936321		0.941079
	0.1127			0.926688		0.943917		0.936373		0.941147
	0.1128			0.926734		0.943981		0.936423		0.941214
	0.1129			0.926782		0.944047		0.936474		0.941281
	0.113			0.926829		0.944111		0.936525		0.941344
	0.1131			0.926874		0.944175		0.936574		0.941407
	0.1132			0.92692		0.944239		0.936624		0.94147
	0.1133			0.926968		0.944302		0.936674		0.941535
	0.1134			0.927015		0.944365		0.936724		0.941599
	0.1135			0.92706		0.944427		0.936775		0.94166
	0.1136			0.927105		0.94449		0.936825		0.941723
	0.1137			0.927151		0.944551		0.936876		0.941789
	0.1138			0.927196		0.944613		0.936926		0.941856
	0.1139			0.927241		0.944674		0.936976		0.941921
	0.114			0.927288		0.944737		0.937026		0.941987
	0.1141			0.927336		0.944799		0.937076		0.942052
	0.1142			0.927381		0.944863		0.937128		0.942117
	0.1143			0.927426		0.944927		0.937179		0.942182
	0.1144			0.927472		0.94499		0.937232		0.942246
	0.1145			0.927517		0.945056		0.937286		0.942311
	0.1146			0.927562		0.945118		0.937339		0.942377
	0.1147			0.927607		0.94518		0.937392		0.942443
	0.1148			0.927654		0.945242		0.937443		0.942508
	0.1149			0.927699		0.945305		0.937494		0.942572
	0.115			0.927745		0.945368		0.937546		0.942636
	0.1151			0.927791		0.945431		0.937598		0.9427
	0.1152			0.927837		0.945491		0.937648		0.942763
	0.1153			0.927884		0.945551		0.937699		0.942826
	0.1154			0.927931		0.945615		0.937752		0.942889
	0.1155			0.927977		0.945678		0.937802		0.942954
	0.1156			0.928023		0.945738		0.937851		0.943016
	0.1157			0.928069		0.945798		0.9379		0.943078
	0.1158			0.928117		0.945858		0.937951		0.943141
	0.1159			0.928164		0.945921		0.938002		0.943205
	0.116			0.928208		0.945982		0.938051		0.94327
	0.1161			0.928254		0.946041		0.938101		0.943333
	0.1162			0.928301		0.946101		0.938151		0.943395
	0.1163			0.928348		0.94616		0.938201		0.943455
	0.1164			0.928393		0.946221		0.938251		0.943515
	0.1165			0.928439		0.94628		0.938299		0.943576
	0.1166			0.928485		0.946337		0.938349		0.943635
	0.1167			0.928531		0.946395		0.938397		0.943694
	0.1168			0.928576		0.946453		0.938444		0.943752
	0.1169			0.928621		0.946511		0.938492		0.94381
	0.117			0.928666		0.94657		0.938541		0.943869
	0.1171			0.928712		0.946627		0.938589		0.943927
	0.1172			0.928757		0.946681		0.938637		0.943985
	0.1173			0.928803		0.946738		0.938684		0.944042
	0.1174			0.928848		0.946796		0.938732		0.944097
	0.1175			0.928891		0.946851		0.938781		0.944151
	0.1176			0.928937		0.946907		0.93883		0.944207
	0.1177			0.928983		0.946962		0.938879		0.944263
	0.1178			0.929028		0.947018		0.938926		0.94432
	0.1179			0.929075		0.947075		0.938975		0.944377
	0.118			0.929121		0.947129		0.939026		0.944434
	0.1181			0.929167		0.947184		0.939075		0.944491
	0.1182			0.92921		0.94724		0.939126		0.944549
	0.1183			0.929255		0.947297		0.939176		0.944605
	0.1184			0.929301		0.947355		0.939224		0.944659
	0.1185			0.929348		0.947412		0.939273		0.944716
	0.1186			0.929393		0.947466		0.939322		0.944775
	0.1187			0.929438		0.947522		0.939372		0.944831
	0.1188			0.929484		0.947581		0.939421		0.944889
	0.1189			0.929529		0.947639		0.939471		0.944947
	0.119			0.929575		0.947697		0.939522		0.945005
	0.1191			0.929621		0.947755		0.93957		0.945061
	0.1192			0.929667		0.947815		0.939619		0.945117
	0.1193			0.929714		0.947873		0.939667		0.945176
	0.1194			0.929761		0.947929		0.939714		0.945232
	0.1195			0.929807		0.947986		0.939763		0.945288
	0.1196			0.929853		0.948043		0.939812		0.945345
	0.1197			0.9299		0.9481		0.939861		0.945403
	0.1198			0.929945		0.948155		0.93991		0.945461
	0.1199			0.92999		0.948211		0.939959		0.945518
	0.12			0.930036		0.948266		0.940006		0.945576
	0.1201			0.930081		0.948323		0.940054		0.945633
	0.1202			0.930126		0.94838		0.940101		0.945693
	0.1203			0.93017		0.948434		0.940149		0.945752
	0.1204			0.930216		0.948488		0.940199		0.94581
	0.1205			0.930262		0.948541		0.940246		0.945867
	0.1206			0.930307		0.948595		0.940293		0.945925
	0.1207			0.930352		0.948652		0.940338		0.945983
	0.1208			0.930396		0.948707		0.940384		0.946041
	0.1209			0.93044		0.948764		0.94043		0.946099
	0.121			0.930485		0.948824		0.940475		0.946157
	0.1211			0.930528		0.948881		0.940521		0.946215
	0.1212			0.930573		0.948934		0.940566		0.946273
	0.1213			0.930618		0.948991		0.940612		0.946329
	0.1214			0.930661		0.949048		0.940658		0.946385
	0.1215			0.930703		0.949105		0.940704		0.946441
	0.1216			0.930747		0.949162		0.940749		0.946496
	0.1217			0.930792		0.949218		0.940795		0.946549
	0.1218			0.930835		0.949277		0.940841		0.946602
	0.1219			0.930878		0.949333		0.940887		0.946655
	0.122			0.930921		0.949391		0.940932		0.946711
	0.1221			0.930963		0.949448		0.940978		0.946764
	0.1222			0.931006		0.949507		0.941023		0.946816
	0.1223			0.931049		0.949563		0.941071		0.946869
	0.1224			0.931093		0.949619		0.941116		0.946919
	0.1225			0.931136		0.949675		0.941161		0.94697
	0.1226			0.931177		0.94973		0.941208		0.947022
	0.1227			0.931218		0.949786		0.941254		0.947071
	0.1228			0.931261		0.94984		0.941299		0.947121
	0.1229			0.931305		0.949893		0.941345		0.947171
	0.123			0.931348		0.949948		0.941391		0.947222
	0.1231			0.931392		0.950002		0.941437		0.947273
	0.1232			0.931437		0.950057		0.941482		0.947325
	0.1233			0.931481		0.950113		0.941527		0.947377
	0.1234			0.931525		0.950166		0.941571		0.94743
	0.1235			0.931567		0.950218		0.941616		0.947485
	0.1236			0.931609		0.950271		0.941659		0.947539
	0.1237			0.931652		0.950325		0.941702		0.947594
	0.1238			0.931693		0.950378		0.941746		0.947648
	0.1239			0.931736		0.950431		0.94179		0.947702
	0.124			0.931779		0.950485		0.941833		0.947757
	0.1241			0.931818		0.950539		0.941876		0.947811
	0.1242			0.931859		0.950595		0.941918		0.947867
	0.1243			0.931901		0.95065		0.94196		0.947923
	0.1244			0.931941		0.950706		0.942003		0.947976
	0.1245			0.931983		0.950761		0.942046		0.94803
	0.1246			0.932024		0.950816		0.942091		0.948085
	0.1247			0.932063		0.95087		0.942134		0.94814
	0.1248			0.932106		0.950924		0.942176		0.948194
	0.1249			0.932146		0.95098		0.942219		0.948247
	0.125			0.932187		0.951031		0.942262		0.948299
	0.1251			0.932227		0.951084		0.942305		0.948351
	0.1252			0.932266		0.951139		0.942348		0.948403
	0.1253			0.932306		0.951192		0.942391		0.948456
	0.1254			0.932347		0.951248		0.942433		0.948509
	0.1255			0.932387		0.951303		0.942473		0.948561
	0.1256			0.932427		0.951357		0.942517		0.948614
	0.1257			0.932467		0.951411		0.94256		0.948666
	0.1258			0.932508		0.951465		0.942603		0.948718
	0.1259			0.932551		0.951519		0.942646		0.948769
	0.126			0.932592		0.951571		0.942689		0.948823
	0.1261			0.932632		0.951626		0.942732		0.948876
	0.1262			0.932674		0.95168		0.942777		0.948932
	0.1263			0.932715		0.951732		0.942822		0.948988
	0.1264			0.932757		0.951785		0.94287		0.949042
	0.1265			0.932798		0.951838		0.942916		0.949098
	0.1266			0.93284		0.951896		0.942962		0.949154
	0.1267			0.932882		0.951951		0.943009		0.949209
	0.1268			0.932924		0.952005		0.943056		0.949265
	0.1269			0.932964		0.952058		0.943103		0.949321
	0.127			0.933006		0.952109		0.943149		0.949375
	0.1271			0.933048		0.952162		0.943196		0.949433
	0.1272			0.933089		0.952215		0.943243		0.949491
	0.1273			0.93313		0.952268		0.943289		0.949549
	0.1274			0.933171		0.95232		0.943334		0.949607
	0.1275			0.933213		0.952372		0.94338		0.949663
	0.1276			0.933253		0.952425		0.943424		0.94972
	0.1277			0.933293		0.952477		0.943471		0.949772
	0.1278			0.933333		0.952528		0.943518		0.949825
	0.1279			0.933372		0.952581		0.943563		0.949879
	0.128			0.933411		0.952636		0.943608		0.949935
	0.1281			0.933449		0.95269		0.943653		0.949993
	0.1282			0.933489		0.952744		0.943697		0.95005
	0.1283			0.933528		0.952797		0.943742		0.950106
	0.1284			0.933568		0.952851		0.943788		0.950161
	0.1285			0.933606		0.952907		0.943833		0.950216
	0.1286			0.933645		0.952962		0.943878		0.950273
	0.1287			0.933684		0.953014		0.943922		0.95033
	0.1288			0.933723		0.953068		0.943965		0.950388
	0.1289			0.933762		0.95312		0.944009		0.950443
	0.129			0.9338		0.953173		0.944054		0.950499
	0.1291			0.93384		0.953226		0.944098		0.950553
	0.1292			0.93388		0.95328		0.94414		0.950608
	0.1293			0.93392		0.953335		0.944184		0.950665
	0.1294			0.933959		0.953388		0.944229		0.950723
	0.1295			0.933998		0.953444		0.944273		0.950778
	0.1296			0.934037		0.953498		0.944316		0.950833
	0.1297			0.934076		0.953551		0.944361		0.950888
	0.1298			0.934115		0.953604		0.944405		0.950941
	0.1299			0.934155		0.953661		0.94445		0.950996
	0.13			0.934194		0.953716		0.944494		0.951051
	0.1301			0.934234		0.953769		0.944539		0.951105
	0.1302			0.934272		0.953821		0.944584		0.951159
	0.1303			0.93431		0.953873		0.944628		0.951214
	0.1304			0.934349		0.953924		0.944673		0.95127
	0.1305			0.934389		0.953975		0.944717		0.951326
	0.1306			0.934428		0.954027		0.944762		0.951383
	0.1307			0.934465		0.954079		0.944805		0.95144
	0.1308			0.934506		0.954132		0.944846		0.951496
	0.1309			0.934545		0.954186		0.944889		0.951554
	0.131			0.934584		0.954239		0.944932		0.951612
	0.1311			0.934624		0.954292		0.944975		0.951667
	0.1312			0.934664		0.954344		0.945017		0.951724
	0.1313			0.934704		0.954396		0.945059		0.951778
	0.1314			0.934743		0.954449		0.9451		0.951833
	0.1315			0.934781		0.954499		0.945141		0.951888
	0.1316			0.934819		0.954551		0.945182		0.951941
	0.1317			0.934859		0.954601		0.945223		0.951994
	0.1318			0.934898		0.954652		0.945265		0.952048
	0.1319			0.934936		0.954703		0.945307		0.952098
	0.132			0.934975		0.954756		0.945349		0.952149
	0.1321			0.935014		0.95481		0.945391		0.952202
	0.1322			0.93505		0.954863		0.945433		0.952254
	0.1323			0.935088		0.954915		0.945473		0.952301
	0.1324			0.935127		0.954966		0.945513		0.952352
	0.1325			0.935167		0.955017		0.945554		0.952402
	0.1326			0.935205		0.955067		0.945595		0.952451
	0.1327			0.935242		0.955119		0.945638		0.9525
	0.1328			0.935281		0.955169		0.94568		0.95255
	0.1329			0.935322		0.955219		0.94572		0.952602
	0.133			0.935361		0.955267		0.94576		0.952654
	0.1331			0.9354		0.955317		0.9458		0.952703
	0.1332			0.935439		0.955366		0.945839		0.952752
	0.1333			0.935478		0.955417		0.945877		0.952803
	0.1334			0.935516		0.955466		0.945917		0.952856
	0.1335			0.935556		0.955516		0.945959		0.952908
	0.1336			0.935593		0.955566		0.946		0.95296
	0.1337			0.935632		0.955615		0.94604		0.953014
	0.1338			0.93567		0.955664		0.94608		0.953067
	0.1339			0.935709		0.955712		0.946121		0.953121
	0.134			0.935748		0.955761		0.946162		0.953174
	0.1341			0.935787		0.95581		0.946203		0.953227
	0.1342			0.935826		0.955859		0.946244		0.953281
	0.1343			0.935863		0.955907		0.946284		0.953335
	0.1344			0.935899		0.955955		0.946325		0.95339
	0.1345			0.935935		0.956002		0.946365		0.953445
	0.1346			0.935973		0.956051		0.946406		0.953501
	0.1347			0.936011		0.956097		0.946446		0.953556
	0.1348			0.936049		0.956146		0.946485		0.953612
	0.1349			0.936087		0.956192		0.946524		0.953668
	0.135			0.936124		0.95624		0.946565		0.953724
	0.1351			0.936162		0.956288		0.946606		0.953781
	0.1352			0.9362		0.956337		0.946645		0.953837
	0.1353			0.936239		0.956384		0.946685		0.953895
	0.1354			0.936277		0.956431		0.946725		0.953951
	0.1355			0.936315		0.956479		0.946765		0.954006
	0.1356			0.936354		0.956527		0.946805		0.954061
	0.1357			0.936394		0.956574		0.946844		0.954117
	0.1358			0.936432		0.956622		0.946883		0.954172
	0.1359			0.936469		0.956671		0.946921		0.954227
	0.136			0.936507		0.956718		0.946959		0.954283
	0.1361			0.936546		0.956765		0.946998		0.954336
	0.1362			0.936585		0.956816		0.947036		0.954391
	0.1363			0.936623		0.956867		0.947074		0.954448
	0.1364			0.936661		0.956916		0.94711		0.954502
	0.1365			0.936698		0.956967		0.947148		0.954554
	0.1366			0.936737		0.957015		0.947186		0.954607
	0.1367			0.936775		0.957067		0.947224		0.954661
	0.1368			0.936813		0.95712		0.947263		0.954714
	0.1369			0.936851		0.957171		0.9473		0.954765
	0.137			0.936889		0.957222		0.947339		0.954817
	0.1371			0.936926		0.957272		0.947378		0.954868
	0.1372			0.936965		0.957325		0.947418		0.95492
	0.1373			0.937004		0.957375		0.947456		0.954971
	0.1374			0.937044		0.957424		0.947496		0.955022
	0.1375			0.937084		0.957474		0.947536		0.955074
	0.1376			0.937122		0.957525		0.947577		0.955125
	0.1377			0.93716		0.957573		0.947618		0.955175
	0.1378			0.937197		0.957623		0.947659		0.955226
	0.1379			0.937234		0.95767		0.947699		0.955278
	0.138			0.937271		0.95772		0.947739		0.955333
	0.1381			0.937308		0.957768		0.947778		0.955388
	0.1382			0.937346		0.957816		0.947818		0.955439
	0.1383			0.937382		0.957863		0.947858		0.955491
	0.1384			0.937422		0.95791		0.947897		0.955542
	0.1385			0.937462		0.957958		0.947934		0.955595
	0.1386			0.9375		0.958007		0.947973		0.955648
	0.1387			0.93754		0.958055		0.94801		0.955701
	0.1388			0.93758		0.958102		0.948049		0.955752
	0.1389			0.937619		0.958151		0.948089		0.9558
	0.139			0.937659		0.958201		0.948127		0.955851
	0.1391			0.937698		0.958251		0.948164		0.955901
	0.1392			0.937736		0.958302		0.948203		0.95595
	0.1393			0.937776		0.958352		0.948242		0.956
	0.1394			0.937813		0.958403		0.948283		0.956048
	0.1395			0.93785		0.958452		0.948322		0.956099
	0.1396			0.937889		0.958502		0.94836		0.956149
	0.1397			0.937926		0.958552		0.948399		0.956199
	0.1398			0.937963		0.958604		0.948437		0.956248
	0.1399			0.937999		0.958654		0.948476		0.956295
	0.14			0.938035		0.958703		0.948514		0.956344
	0.1401			0.938074		0.958755		0.948554		0.956392
	0.1402			0.938111		0.958807		0.948593		0.956441
	0.1403			0.938146		0.958858		0.948632		0.956489
	0.1404			0.938182		0.958908		0.948671		0.956538
	0.1405			0.938221		0.958956		0.948709		0.956585
	0.1406			0.938261		0.959005		0.948745		0.956632
	0.1407			0.9383		0.959055		0.948781		0.95668
	0.1408			0.938337		0.959103		0.94882		0.956726
	0.1409			0.938375		0.959155		0.948859		0.956771
	0.141			0.938413		0.959205		0.948898		0.956817
	0.1411			0.93845		0.959251		0.948935		0.956862
	0.1412			0.938485		0.959298		0.948972		0.956908
	0.1413			0.938521		0.959342		0.949009		0.956951
	0.1414			0.938557		0.959388		0.949046		0.956994
	0.1415			0.938592		0.959435		0.949081		0.95704
	0.1416			0.938628		0.959482		0.949117		0.957087
	0.1417			0.938665		0.959528		0.949153		0.957132
	0.1418			0.9387		0.959575		0.949188		0.957177
	0.1419			0.938737		0.95962		0.949223		0.957223
	0.142			0.938774		0.959666		0.949258		0.957269
	0.1421			0.938811		0.959712		0.949291		0.957316
	0.1422			0.938847		0.959757		0.949326		0.957363
	0.1423			0.938883		0.959803		0.949361		0.95741
	0.1424			0.93892		0.959848		0.949396		0.957456
	0.1425			0.938957		0.959894		0.949433		0.957504
	0.1426			0.938994		0.959938		0.949469		0.957553
	0.1427			0.93903		0.959983		0.949503		0.957601
	0.1428			0.939068		0.960028		0.949538		0.957646
	0.1429			0.939104		0.960074		0.949573		0.95769
	0.143			0.93914		0.960118		0.949607		0.957735
	0.1431			0.939175		0.960161		0.949643		0.957779
	0.1432			0.939211		0.960203		0.94968		0.957824
	0.1433			0.939248		0.960244		0.949717		0.957873
	0.1434			0.939284		0.960286		0.949754		0.957918
	0.1435			0.939318		0.960327		0.94979		0.957963
	0.1436			0.939353		0.96037		0.949826		0.958008
	0.1437			0.93939		0.960411		0.949862		0.958054
	0.1438			0.939427		0.960453		0.949897		0.958099
	0.1439			0.939463		0.960494		0.949932		0.958146
	0.144			0.9395		0.960534		0.949967		0.958193
	0.1441			0.939535		0.960576		0.950001		0.958239
	0.1442			0.939571		0.960617		0.950034		0.958285
	0.1443			0.939607		0.960656		0.950068		0.95833
	0.1444			0.939644		0.960695		0.950103		0.958378
	0.1445			0.939679		0.960735		0.95014		0.958427
	0.1446			0.939716		0.960776		0.950176		0.958473
	0.1447			0.939754		0.960814		0.95021		0.958518
	0.1448			0.93979		0.960851		0.950246		0.958567
	0.1449			0.939825		0.960887		0.950282		0.958616
	0.145			0.939862		0.960923		0.950317		0.958664
	0.1451			0.939898		0.96096		0.950352		0.958711
	0.1452			0.939935		0.960996		0.950387		0.958757
	0.1453			0.939973		0.961032		0.950421		0.958805
	0.1454			0.940012		0.961067		0.950455		0.958852
	0.1455			0.940049		0.961102		0.950488		0.9589
	0.1456			0.940086		0.961141		0.950522		0.958946
	0.1457			0.940124		0.96118		0.950556		0.958992
	0.1458			0.940161		0.961215		0.950588		0.959038
	0.1459			0.940196		0.961251		0.950621		0.959082
	0.146			0.940231		0.961289		0.950654		0.959127
	0.1461			0.940267		0.961326		0.950687		0.959172
	0.1462			0.940302		0.961367		0.95072		0.959218
	0.1463			0.940338		0.961407		0.950752		0.959264
	0.1464			0.940372		0.961446		0.950785		0.95931
	0.1465			0.940406		0.961486		0.95082		0.959356
	0.1466			0.940441		0.961525		0.950855		0.959398
	0.1467			0.940475		0.961563		0.95089		0.959443
	0.1468			0.94051		0.961603		0.950925		0.959487
	0.1469			0.940546		0.961642		0.95096		0.95953
	0.147			0.940584		0.96168		0.950993		0.959573
	0.1471			0.940618		0.96172		0.951027		0.959617
	0.1472			0.940654		0.961761		0.951063		0.95966
	0.1473			0.940691		0.961803		0.951096		0.959704
	0.1474			0.940729		0.961844		0.951131		0.959747
	0.1475			0.940764		0.961884		0.951165		0.95979
	0.1476			0.9408		0.961925		0.951201		0.959833
	0.1477			0.940836		0.961966		0.951236		0.959877
	0.1478			0.940871		0.962005		0.951271		0.959921
	0.1479			0.940907		0.962046		0.951306		0.959964
	0.148			0.940944		0.962087		0.95134		0.960008
	0.1481			0.940979		0.962128		0.951374		0.960052
	0.1482			0.941013		0.962169		0.951407		0.960093
	0.1483			0.941047		0.962212		0.951444		0.960134
	0.1484			0.941081		0.962255		0.95148		0.960175
	0.1485			0.941117		0.962295		0.951514		0.96022
	0.1486			0.94115		0.962337		0.951547		0.960263
	0.1487			0.941184		0.962378		0.951582		0.960304
	0.1488			0.941219		0.96242		0.951616		0.960346
	0.1489			0.941254		0.962463		0.95165		0.960387
	0.149			0.941288		0.962505		0.951684		0.960428
	0.1491			0.941322		0.962546		0.951719		0.960472
	0.1492			0.941357		0.962588		0.951753		0.960515
	0.1493			0.941393		0.962632		0.951787		0.960559
	0.1494			0.941428		0.962675		0.95182		0.960603
	0.1495			0.941462		0.962718		0.951852		0.960646
	0.1496			0.941496		0.962763		0.951888		0.960688
	0.1497			0.94153		0.962809		0.951922		0.960729
	0.1498			0.941564		0.962852		0.951955		0.960771
	0.1499			0.941598		0.962895		0.95199		0.960813
	0.15			0.941631		0.962937		0.952024		0.960854
	0.1501			0.941663		0.962981		0.952057		0.960896
	0.1502			0.941697		0.963023		0.952091		0.960939
	0.1503			0.94173		0.963065		0.952124		0.960982
	0.1504			0.941765		0.963108		0.952157		0.961023
	0.1505			0.941798		0.963152		0.95219		0.961064
	0.1506			0.941831		0.963196		0.952221		0.961104
	0.1507			0.941863		0.963238		0.952254		0.961146
	0.1508			0.941897		0.963279		0.952287		0.961186
	0.1509			0.941931		0.963319		0.952318		0.961226
	0.151			0.941963		0.963358		0.952351		0.961267
	0.1511			0.941995		0.963398		0.952384		0.961307
	0.1512			0.94203		0.963437		0.952416		0.961349
	0.1513			0.942063		0.963474		0.952447		0.961393
	0.1514			0.942095		0.963511		0.95248		0.961436
	0.1515			0.942128		0.963551		0.952513		0.961478
	0.1516			0.942162		0.963588		0.952547		0.961519
	0.1517			0.942194		0.963626		0.952578		0.961563
	0.1518			0.942228		0.963663		0.95261		0.961607
	0.1519			0.942262		0.963702		0.952642		0.961651
	0.152			0.942295		0.96374		0.952675		0.961695
	0.1521			0.942328		0.963777		0.952708		0.961738
	0.1522			0.94236		0.963815		0.952739		0.961781
	0.1523			0.942393		0.963853		0.95277		0.961825
	0.1524			0.942427		0.963893		0.952803		0.96187
	0.1525			0.942465		0.963931		0.952835		0.961914
	0.1526			0.9425		0.963972		0.952868		0.961958
	0.1527			0.942533		0.96401		0.952902		0.962003
	0.1528			0.942568		0.964047		0.952937		0.962047
	0.1529			0.942603		0.964086		0.952971		0.962091
	0.153			0.94264		0.964126		0.953005		0.962135
	0.1531			0.942674		0.964166		0.95304		0.962179
	0.1532			0.942708		0.964205		0.953075		0.962222
	0.1533			0.942742		0.964243		0.95311		0.962267
	0.1534			0.942776		0.96428		0.953145		0.962312
	0.1535			0.94281		0.964319		0.953179		0.962356
	0.1536			0.942845		0.964357		0.953214		0.9624
	0.1537			0.942881		0.964398		0.953248		0.962445
	0.1538			0.942915		0.964438		0.953283		0.962489
	0.1539			0.942949		0.964479		0.953319		0.962533
	0.154			0.942984		0.964518		0.953354		0.962579
	0.1541			0.94302		0.964557		0.953389		0.962625
	0.1542			0.943055		0.964598		0.953426		0.962667
	0.1543			0.943089		0.964639		0.953463		0.962708
	0.1544			0.943123		0.964679		0.953499		0.962749
	0.1545			0.943157		0.964719		0.953535		0.962789
	0.1546			0.943191		0.964759		0.953571		0.962831
	0.1547			0.943224		0.964798		0.953608		0.962873
	0.1548			0.943258		0.964838		0.953645		0.962914
	0.1549			0.94329		0.964879		0.95368		0.962956
	0.155			0.943323		0.96492		0.953716		0.962996
	0.1551			0.943356		0.964961		0.953754		0.963037
	0.1552			0.943387		0.965002		0.953792		0.963078
	0.1553			0.943418		0.965046		0.953828		0.963119
	0.1554			0.943451		0.96509		0.953862		0.963158
	0.1555			0.943484		0.965132		0.953896		0.963196
	0.1556			0.943516		0.965173		0.953932		0.963237
	0.1557			0.943549		0.965215		0.953968		0.963278
	0.1558			0.943581		0.965257		0.954002		0.963319
	0.1559			0.943611		0.965297		0.954038		0.96336
	0.156			0.943641		0.965338		0.954073		0.963402
	0.1561			0.943673		0.965379		0.954108		0.963443
	0.1562			0.943705		0.965418		0.954145		0.963482
	0.1563			0.943736		0.965457		0.95418		0.963522
	0.1564			0.943766		0.965495		0.954216		0.963562
	0.1565			0.943797		0.965534		0.954251		0.963601
	0.1566			0.943829		0.965574		0.954288		0.96364
	0.1567			0.94386		0.965613		0.954323		0.963681
	0.1568			0.943891		0.965652		0.954358		0.963721
	0.1569			0.943922		0.96569		0.954393		0.96376
	0.157			0.943954		0.965731		0.954427		0.963799
	0.1571			0.943984		0.96577		0.954463		0.963838
	0.1572			0.944015		0.965806		0.954498		0.963878
	0.1573			0.944047		0.965845		0.954532		0.963915
	0.1574			0.944078		0.965883		0.954565		0.963954
	0.1575			0.944109		0.965921		0.954599		0.963994
	0.1576			0.944143		0.965961		0.954633		0.964031
	0.1577			0.944175		0.966		0.954669		0.96407
	0.1578			0.944206		0.966038		0.954705		0.964108
	0.1579			0.944239		0.966075		0.954741		0.964146
	0.158			0.944271		0.966114		0.954776		0.964186
	0.1581			0.944303		0.966151		0.954811		0.964223
	0.1582			0.944334		0.966187		0.954843		0.964263
	0.1583			0.944365		0.966225		0.954878		0.964302
	0.1584			0.944395		0.966263		0.954912		0.96434
	0.1585			0.944426		0.966299		0.954945		0.964376
	0.1586			0.944458		0.966337		0.954977		0.964414
	0.1587			0.944489		0.966376		0.955011		0.964451
	0.1588			0.94452		0.966415		0.955045		0.964487
	0.1589			0.944551		0.966453		0.955079		0.964524
	0.159			0.944582		0.96649		0.955114		0.96456
	0.1591			0.944612		0.966528		0.955149		0.964598
	0.1592			0.944642		0.966566		0.955186		0.964635
	0.1593			0.944672		0.966603		0.95522		0.964672
	0.1594			0.944702		0.966638		0.955255		0.964709
	0.1595			0.944732		0.966675		0.955288		0.964747
	0.1596			0.944763		0.966714		0.955323		0.964786
	0.1597			0.944794		0.966751		0.955359		0.964825
	0.1598			0.944824		0.966789		0.955394		0.964864
	0.1599			0.944854		0.966826		0.955429		0.964901
	0.16			0.944886		0.966863		0.955465		0.964935
	0.1601			0.944917		0.966901		0.955498		0.96497
	0.1602			0.944948		0.966941		0.955533		0.965006
	0.1603			0.944979		0.966979		0.955569		0.965042
	0.1604			0.945009		0.967017		0.955602		0.965076
	0.1605			0.94504		0.967052		0.955637		0.965113
	0.1606			0.945071		0.96709		0.955673		0.965149
	0.1607			0.945101		0.967129		0.955707		0.965185
	0.1608			0.945132		0.967167		0.955741		0.965221
	0.1609			0.945163		0.967204		0.955774		0.965256
	0.161			0.945193		0.967241		0.955808		0.965293
	0.1611			0.945222		0.967279		0.955841		0.96533
	0.1612			0.945251		0.967318		0.955873		0.965366
	0.1613			0.945282		0.967358		0.955906		0.965404
	0.1614			0.945314		0.967394		0.95594		0.96544
	0.1615			0.945345		0.96743		0.955973		0.965476
	0.1616			0.945374		0.967468		0.956006		0.965513
	0.1617			0.945404		0.967508		0.95604		0.965548
	0.1618			0.945435		0.967548		0.956073		0.965584
	0.1619			0.945468		0.967585		0.956106		0.96562
	0.162			0.9455		0.967624		0.95614		0.965657
	0.1621			0.94553		0.967661		0.956174		0.965692
	0.1622			0.945561		0.9677		0.956206		0.965729
	0.1623			0.94559		0.967739		0.956237		0.965766
	0.1624			0.94562		0.967777		0.956268		0.965803
	0.1625			0.94565		0.967815		0.956301		0.965839
	0.1626			0.94568		0.967853		0.956333		0.965877
	0.1627			0.945709		0.967888		0.956364		0.965914
	0.1628			0.945738		0.96792		0.956397		0.96595
	0.1629			0.945766		0.967955		0.956429		0.965987
	0.163			0.945795		0.967992		0.95646		0.966024
	0.1631			0.945825		0.968027		0.956491		0.96606
	0.1632			0.945854		0.96806		0.956522		0.966097
	0.1633			0.945884		0.968093		0.956554		0.966131
	0.1634			0.945915		0.968128		0.956586		0.966164
	0.1635			0.945944		0.968163		0.956617		0.9662
	0.1636			0.945974		0.968197		0.956648		0.966235
	0.1637			0.946004		0.968233		0.956678		0.96627
	0.1638			0.946037		0.968271		0.95671		0.966305
	0.1639			0.94607		0.968307		0.956741		0.96634
	0.164			0.9461		0.968342		0.956771		0.966375
	0.1641			0.94613		0.96838		0.956802		0.96641
	0.1642			0.94616		0.968416		0.956834		0.966445
	0.1643			0.946191		0.968454		0.956864		0.966481
	0.1644			0.94622		0.968493		0.956893		0.966518
	0.1645			0.94625		0.968528		0.956923		0.966555
	0.1646			0.94628		0.968563		0.956952		0.96659
	0.1647			0.946311		0.968598		0.956982		0.966627
	0.1648			0.946341		0.968634		0.957011		0.966664
	0.1649			0.946369		0.968668		0.957041		0.966702
	0.165			0.946399		0.968703		0.957071		0.96674
	0.1651			0.946428		0.968738		0.957102		0.966776
	0.1652			0.946458		0.968774		0.957131		0.966812
	0.1653			0.946489		0.968812		0.957161		0.96685
	0.1654			0.946519		0.968848		0.957191		0.966888
	0.1655			0.946549		0.968881		0.957222		0.966924
	0.1656			0.94658		0.968915		0.957254		0.966959
	0.1657			0.946609		0.968948		0.957285		0.966997
	0.1658			0.946638		0.968981		0.957316		0.967034
	0.1659			0.946667		0.969015		0.957346		0.967071
	0.166			0.946698		0.969051		0.957376		0.967108
	0.1661			0.946728		0.969085		0.957407		0.967147
	0.1662			0.946757		0.969121		0.957438		0.967185
	0.1663			0.946786		0.969154		0.957469		0.967221
	0.1664			0.946815		0.969189		0.9575		0.967257
	0.1665			0.946844		0.969223		0.957531		0.967292
	0.1666			0.946873		0.969256		0.957563		0.967329
	0.1667			0.946901		0.969289		0.957594		0.967365
	0.1668			0.946932		0.969323		0.957628		0.967401
	0.1669			0.946962		0.969356		0.95766		0.967437
	0.167			0.946991		0.969391		0.957692		0.967473
	0.1671			0.947022		0.969427		0.957725		0.967506
	0.1672			0.947053		0.969461		0.957756		0.96754
	0.1673			0.947083		0.969494		0.957788		0.967576
	0.1674			0.947113		0.969525		0.957821		0.967611
	0.1675			0.947143		0.969561		0.957854		0.967645
	0.1676			0.947172		0.969594		0.957887		0.967681
	0.1677			0.947202		0.969627		0.957921		0.967715
	0.1678			0.947233		0.969661		0.957953		0.967749
	0.1679			0.947264		0.969694		0.957985		0.967782
	0.168			0.947292		0.969727		0.958019		0.967816
	0.1681			0.947322		0.969761		0.958051		0.96785
	0.1682			0.947351		0.969794		0.958082		0.967883
	0.1683			0.94738		0.969824		0.958113		0.967916
	0.1684			0.947409		0.969858		0.958145		0.96795
	0.1685			0.947438		0.969894		0.958175		0.967985
	0.1686			0.947467		0.96993		0.958206		0.968017
	0.1687			0.947497		0.969966		0.958235		0.96805
	0.1688			0.947527		0.970001		0.958264		0.968084
	0.1689			0.947558		0.970036		0.958294		0.968119
	0.169			0.947587		0.97007		0.958323		0.968154
	0.1691			0.947617		0.970104		0.958354		0.968188
	0.1692			0.947648		0.970138		0.958386		0.968223
	0.1693			0.947678		0.970172		0.958417		0.968258
	0.1694			0.947709		0.970207		0.958448		0.968291
	0.1695			0.947739		0.970241		0.958479		0.968326
	0.1696			0.947767		0.970276		0.95851		0.968361
	0.1697			0.947796		0.970311		0.958542		0.968396
	0.1698			0.947825		0.970344		0.958574		0.96843
	0.1699			0.947853		0.970378		0.958607		0.968464
	0.17			0.947881		0.970412		0.958639		0.968498
	0.1701			0.947909		0.970444		0.95867		0.968533
	0.1702			0.947938		0.970477		0.958702		0.968567
	0.1703			0.947965		0.97051		0.958734		0.968601
	0.1704			0.947993		0.970544		0.958766		0.968637
	0.1705			0.948021		0.97058		0.958797		0.968673
	0.1706			0.948049		0.970613		0.958829		0.968709
	0.1707			0.948077		0.970647		0.958864		0.968743
	0.1708			0.948105		0.97068		0.958896		0.968776
	0.1709			0.948132		0.970712		0.958928		0.968811
	0.171			0.948158		0.970747		0.958959		0.968845
	0.1711			0.948186		0.970783		0.958991		0.968881
	0.1712			0.948214		0.970817		0.959022		0.968915
	0.1713			0.94824		0.970851		0.959053		0.968951
	0.1714			0.948268		0.970887		0.959084		0.968985
	0.1715			0.948296		0.970922		0.959117		0.969018
	0.1716			0.948323		0.970957		0.959148		0.969051
	0.1717			0.948349		0.970991		0.959181		0.969083
	0.1718			0.948376		0.971024		0.959214		0.969116
	0.1719			0.948403		0.971059		0.959245		0.969149
	0.172			0.94843		0.971092		0.959276		0.969181
	0.1721			0.948458		0.971125		0.959309		0.969213
	0.1722			0.948486		0.97116		0.959342		0.969247
	0.1723			0.948512		0.971194		0.959376		0.969277
	0.1724			0.948539		0.971228		0.95941		0.96931
	0.1725			0.948568		0.971263		0.959442		0.969343
	0.1726			0.948595		0.971299		0.959474		0.969377
	0.1727			0.948623		0.971337		0.959509		0.96941
	0.1728			0.948651		0.971374		0.959544		0.969445
	0.1729			0.94868		0.97141		0.95958		0.969478
	0.173			0.948709		0.971446		0.959615		0.969511
	0.1731			0.948737		0.971482		0.95965		0.969547
	0.1732			0.948765		0.97152		0.959683		0.969583
	0.1733			0.948792		0.971559		0.959717		0.969619
	0.1734			0.948819		0.9716		0.959752		0.969654
	0.1735			0.948847		0.971638		0.959785		0.969688
	0.1736			0.948874		0.971677		0.959819		0.969722
	0.1737			0.948901		0.971717		0.959853		0.969758
	0.1738			0.948929		0.971756		0.959886		0.969793
	0.1739			0.948958		0.971794		0.959916		0.969828
	0.174			0.948986		0.971833		0.959949		0.969863
	0.1741			0.949013		0.971872		0.959981		0.969898
	0.1742			0.949041		0.971912		0.960013		0.969932
	0.1743			0.94907		0.971954		0.960046		0.969969
	0.1744			0.949098		0.971994		0.960079		0.970006
	0.1745			0.949125		0.972032		0.960111		0.970041
	0.1746			0.949151		0.972071		0.960145		0.970074
	0.1747			0.949177		0.972111		0.960178		0.970107
	0.1748			0.949204		0.972151		0.960209		0.970141
	0.1749			0.949231		0.972189		0.960239		0.970175
	0.175			0.949257		0.972225		0.96027		0.970208
	0.1751			0.949283		0.972261		0.960302		0.970243
	0.1752			0.949308		0.972298		0.960334		0.970276
	0.1753			0.949333		0.972334		0.960363		0.97031
	0.1754			0.949359		0.972371		0.960392		0.970345
	0.1755			0.949387		0.972408		0.96042		0.970378
	0.1756			0.949414		0.972444		0.960448		0.970411
	0.1757			0.949439		0.97248		0.960478		0.970444
	0.1758			0.949466		0.972513		0.960507		0.97048
	0.1759			0.949493		0.972546		0.960536		0.970513
	0.176			0.94952		0.97258		0.960564		0.970546
	0.1761			0.949547		0.972615		0.960594		0.970577
	0.1762			0.949573		0.972648		0.960624		0.970608
	0.1763			0.9496		0.972679		0.960654		0.97064
	0.1764			0.949627		0.972714		0.960684		0.970672
	0.1765			0.949654		0.972747		0.960713		0.970703
	0.1766			0.949681		0.97278		0.960743		0.970734
	0.1767			0.949708		0.972816		0.960776		0.970765
	0.1768			0.949735		0.972852		0.960807		0.970794
	0.1769			0.949761		0.972888		0.960837		0.970824
	0.177			0.949787		0.972924		0.960868		0.970854
	0.1771			0.949812		0.972959		0.960899		0.970886
	0.1772			0.949838		0.972994		0.960931		0.970917
	0.1773			0.949864		0.973028		0.960961		0.970946
	0.1774			0.94989		0.973061		0.960992		0.970977
	0.1775			0.949916		0.973094		0.961024		0.971008
	0.1776			0.949942		0.973126		0.961053		0.971038
	0.1777			0.949969		0.973157		0.961082		0.97107
	0.1778			0.949995		0.97319		0.961111		0.971103
	0.1779			0.950022		0.973223		0.961141		0.971135
	0.178			0.95005		0.973257		0.961171		0.971166
	0.1781			0.950076		0.97329		0.961203		0.971198
	0.1782			0.950104		0.973323		0.961233		0.971229
	0.1783			0.950132		0.973358		0.961264		0.97126
	0.1784			0.950158		0.973391		0.961294		0.97129
	0.1785			0.950184		0.973422		0.961323		0.971322
	0.1786			0.950211		0.973454		0.961354		0.971354
	0.1787			0.950237		0.973489		0.961385		0.971386
	0.1788			0.950263		0.973519		0.961415		0.971417
	0.1789			0.95029		0.97355		0.961444		0.971446
	0.179			0.950317		0.973583		0.961474		0.971475
	0.1791			0.950344		0.973615		0.961504		0.971506
	0.1792			0.95037		0.973647		0.961535		0.971538
	0.1793			0.950395		0.973677		0.961565		0.97157
	0.1794			0.950423		0.973707		0.961595		0.971601
	0.1795			0.95045		0.973738		0.961625		0.971632
	0.1796			0.950476		0.97377		0.961654		0.971664
	0.1797			0.950503		0.973802		0.961682		0.971696
	0.1798			0.95053		0.973835		0.961712		0.971728
	0.1799			0.950556		0.973868		0.961742		0.971759
	0.18			0.950584		0.9739		0.961772		0.971792
	0.1801			0.950609		0.973931		0.9618		0.971824
	0.1802			0.950635		0.973962		0.961828		0.971858
	0.1803			0.950661		0.973993		0.961856		0.971893
	0.1804			0.950686		0.974023		0.961884		0.971929
	0.1805			0.950712		0.974051		0.961913		0.971962
	0.1806			0.950738		0.974081		0.961939		0.971995
	0.1807			0.950765		0.974111		0.961965		0.972029
	0.1808			0.95079		0.97414		0.961993		0.972063
	0.1809			0.950817		0.974172		0.96202		0.972098
	0.181			0.950843		0.974205		0.962048		0.972135
	0.1811			0.95087		0.974235		0.962077		0.972172
	0.1812			0.950897		0.974267		0.962106		0.972208
	0.1813			0.950922		0.974301		0.962134		0.972243
	0.1814			0.950947		0.974332		0.962162		0.972278
	0.1815			0.950971		0.974363		0.962191		0.972313
	0.1816			0.950999		0.974393		0.962219		0.972348
	0.1817			0.951026		0.974423		0.962247		0.972382
	0.1818			0.951053		0.974455		0.962277		0.972416
	0.1819			0.951079		0.974485		0.962305		0.972451
	0.182			0.951103		0.974515		0.962334		0.972486
	0.1821			0.951128		0.974543		0.962363		0.97252
	0.1822			0.951155		0.974574		0.962391		0.972555
	0.1823			0.951181		0.974604		0.962419		0.972589
	0.1824			0.951205		0.974634		0.962448		0.972624
	0.1825			0.95123		0.974661		0.962477		0.972661
	0.1826			0.951256		0.974691		0.962505		0.972698
	0.1827			0.951283		0.974719		0.962534		0.972733
	0.1828			0.951309		0.974749		0.962562		0.972767
	0.1829			0.951335		0.974777		0.96259		0.972801
	0.183			0.951362		0.974807		0.962619		0.972835
	0.1831			0.951387		0.974835		0.962647		0.97287
	0.1832			0.951413		0.974863		0.962675		0.972905
	0.1833			0.951439		0.974894		0.962703		0.97294
	0.1834			0.951466		0.974923		0.962732		0.972975
	0.1835			0.951492		0.974951		0.962762		0.973008
	0.1836			0.951519		0.974981		0.962791		0.973041
	0.1837			0.951545		0.975013		0.962818		0.973075
	0.1838			0.951573		0.975046		0.962844		0.973109
	0.1839			0.9516		0.975079		0.962871		0.973142
	0.184			0.951627		0.975112		0.962898		0.973173
	0.1841			0.951653		0.975144		0.962922		0.973206
	0.1842			0.951679		0.975174		0.962949		0.973238
	0.1843			0.951706		0.97521		0.962975		0.973272
	0.1844			0.951733		0.975243		0.963002		0.973306
	0.1845			0.951759		0.975277		0.96303		0.973338
	0.1846			0.951786		0.97531		0.963056		0.973371
	0.1847			0.951814		0.975343		0.963083		0.973405
	0.1848			0.951842		0.975374		0.963108		0.973438
	0.1849			0.95187		0.975403		0.963135		0.973472
	0.185			0.951897		0.975434		0.963162		0.973505
	0.1851			0.951922		0.975467		0.96319		0.973538
	0.1852			0.951948		0.975495		0.963218		0.973573
	0.1853			0.951976		0.975526		0.963245		0.973605
	0.1854			0.952002		0.975558		0.963274		0.973635
	0.1855			0.952028		0.975587		0.963301		0.973666
	0.1856			0.952054		0.975616		0.96333		0.973699
	0.1857			0.95208		0.975647		0.963358		0.973733
	0.1858			0.952106		0.975676		0.963386		0.973765
	0.1859			0.952132		0.975703		0.963415		0.973797
	0.186			0.952159		0.975732		0.963444		0.973829
	0.1861			0.952184		0.97576		0.963474		0.97386
	0.1862			0.95221		0.975788		0.963501		0.973889
	0.1863			0.952236		0.975817		0.963529		0.97392
	0.1864			0.952262		0.975846		0.963557		0.973952
	0.1865			0.952288		0.975879		0.963584		0.973982
	0.1866			0.952315		0.975907		0.963611		0.974011
	0.1867			0.952342		0.975937		0.963641		0.974042
	0.1868			0.952368		0.975967		0.963669		0.974073
	0.1869			0.952394		0.975997		0.963695		0.974101
	0.187			0.952418		0.976026		0.963722		0.97413
	0.1871			0.952442		0.976056		0.963749		0.97416
	0.1872			0.952468		0.976087		0.963777		0.974189
	0.1873			0.952494		0.976119		0.963803		0.974216
	0.1874			0.952519		0.976151		0.96383		0.974244
	0.1875			0.952543		0.97618		0.963856		0.974273
	0.1876			0.952568		0.976211		0.963882		0.974302
	0.1877			0.952593		0.976241		0.963908		0.974332
	0.1878			0.952618		0.976271		0.963934		0.974363
	0.1879			0.952644		0.976302		0.963961		0.974392
	0.188			0.952672		0.976331		0.963986		0.974422
	0.1881			0.952696		0.97636		0.964011		0.974453
	0.1882			0.952721		0.97639		0.964037		0.974484
	0.1883			0.952746		0.976415		0.964063		0.974516
	0.1884			0.95277		0.976445		0.96409		0.974547
	0.1885			0.952797		0.976473		0.964116		0.974577
	0.1886			0.952822		0.976499		0.964143		0.974608
	0.1887			0.952846		0.976527		0.964169		0.974639
	0.1888			0.952873		0.976556		0.964194		0.97467
	0.1889			0.952897		0.976584		0.964219		0.974701
	0.189			0.952923		0.976616		0.964245		0.974731
	0.1891			0.95295		0.976646		0.964271		0.97476
	0.1892			0.952978		0.976675		0.964298		0.974791
	0.1893			0.953004		0.976705		0.964324		0.974822
	0.1894			0.953031		0.976735		0.964351		0.974853
	0.1895			0.953057		0.976766		0.964379		0.974884
	0.1896			0.953084		0.976796		0.964407		0.974915
	0.1897			0.95311		0.976825		0.964434		0.974945
	0.1898			0.953138		0.976853		0.964459		0.974974
	0.1899			0.953164		0.976881		0.964485		0.975005
	0.19			0.953189		0.97691		0.96451		0.975038
	0.1901			0.953214		0.976937		0.964536		0.975069
	0.1902			0.95324		0.976963		0.964562		0.975099
	0.1903			0.953267		0.976989		0.964588		0.975131
	0.1904			0.953293		0.977019		0.964611		0.975163
	0.1905			0.953318		0.977044		0.964634		0.975194
	0.1906			0.953344		0.977069		0.964658		0.975226
	0.1907			0.953371		0.977092		0.964685		0.975257
	0.1908			0.953397		0.977116		0.964712		0.975288
	0.1909			0.953422		0.977139		0.964737		0.975318
	0.191			0.953447		0.977163		0.964764		0.975348
	0.1911			0.953473		0.97719		0.964792		0.975376
	0.1912			0.953498		0.977216		0.964819		0.975404
	0.1913			0.953523		0.97724		0.964847		0.975432
	0.1914			0.953548		0.977266		0.964872		0.975459
	0.1915			0.953573		0.977292		0.964899		0.975487
	0.1916			0.953598		0.97732		0.964926		0.975514
	0.1917			0.953624		0.977348		0.964951		0.97554
	0.1918			0.953651		0.977374		0.964977		0.975568
	0.1919			0.953678		0.977397		0.965004		0.975595
	0.192			0.953704		0.977425		0.965029		0.975624
	0.1921			0.953731		0.977451		0.965055		0.975652
	0.1922			0.953758		0.977475		0.965082		0.975681
	0.1923			0.953783		0.977501		0.965108		0.97571
	0.1924			0.953807		0.977527		0.965133		0.975738
	0.1925			0.953833		0.977556		0.96516		0.975766
	0.1926			0.95386		0.977583		0.965188		0.975794
	0.1927			0.953886		0.97761		0.965214		0.97582
	0.1928			0.95391		0.977636		0.965242		0.975845
	0.1929			0.953934		0.977662		0.965268		0.975874
	0.193			0.953958		0.977688		0.965295		0.975904
	0.1931			0.953983		0.977715		0.965323		0.97593
	0.1932			0.954009		0.977743		0.96535		0.975957
	0.1933			0.954034		0.977769		0.965375		0.975983
	0.1934			0.954058		0.977796		0.965401		0.976009
	0.1935			0.954082		0.977824		0.965426		0.976036
	0.1936			0.954106		0.977852		0.965452		0.976064
	0.1937			0.95413		0.97788		0.965478		0.976092
	0.1938			0.954156		0.977908		0.965503		0.976118
	0.1939			0.954183		0.977937		0.965529		0.976144
	0.194			0.954208		0.977965		0.965556		0.976167
	0.1941			0.954232		0.977994		0.965584		0.976192
	0.1942			0.954256		0.978022		0.965609		0.976216
	0.1943			0.95428		0.978048		0.965636		0.976243
	0.1944			0.954306		0.978074		0.965662		0.976269
	0.1945			0.954331		0.978102		0.965689		0.976293
	0.1946			0.954356		0.978128		0.965717		0.976319
	0.1947			0.954381		0.978158		0.965743		0.976343
	0.1948			0.954408		0.978187		0.96577		0.976368
	0.1949			0.954432		0.978217		0.965798		0.976395
	0.195			0.954456		0.978245		0.965824		0.976423
	0.1951			0.954482		0.978271		0.965847		0.976448
	0.1952			0.954507		0.978298		0.965875		0.976472
	0.1953			0.954532		0.978328		0.965902		0.976498
	0.1954			0.954557		0.97836		0.965928		0.976525
	0.1955			0.954584		0.978391		0.965955		0.976551
	0.1956			0.954608		0.97842		0.965981		0.976575
	0.1957			0.954633		0.97845		0.966006		0.9766
	0.1958			0.954658		0.97848		0.966031		0.976628
	0.1959			0.954684		0.978512		0.966056		0.976656
	0.196			0.954709		0.978544		0.966082		0.976682
	0.1961			0.954732		0.978574		0.966109		0.976708
	0.1962			0.954758		0.978605		0.966134		0.976735
	0.1963			0.954783		0.978636		0.96616		0.976765
	0.1964			0.954806		0.978667		0.966186		0.976795
	0.1965			0.95483		0.978697		0.96621		0.976822
	0.1966			0.954855		0.978728		0.966236		0.976849
	0.1967			0.95488		0.978761		0.96626		0.976877
	0.1968			0.954904		0.978794		0.966284		0.976904
	0.1969			0.954929		0.978826		0.966309		0.97693
	0.197			0.954953		0.978859		0.966334		0.976957
	0.1971			0.954977		0.978888		0.96636		0.976985
	0.1972			0.955002		0.978917		0.966384		0.977012
	0.1973			0.955027		0.978948		0.966411		0.977039
	0.1974			0.955049		0.978981		0.966437		0.977064
	0.1975			0.955074		0.979014		0.966462		0.97709
	0.1976			0.955098		0.979046		0.966489		0.977116
	0.1977			0.955123		0.979078		0.966516		0.977141
	0.1978			0.955147		0.979109		0.966544		0.977169
	0.1979			0.955172		0.979142		0.96657		0.977193
	0.198			0.955198		0.979173		0.966596		0.977219
	0.1981			0.955223		0.979203		0.966624		0.977246
	0.1982			0.955247		0.979232		0.966651		0.977273
	0.1983			0.955271		0.979262		0.966678		0.9773
	0.1984			0.955296		0.979294		0.966704		0.977326
	0.1985			0.95532		0.979326		0.966731		0.977352
	0.1986			0.955344		0.979354		0.966758		0.97738
	0.1987			0.95537		0.979382		0.966783		0.977406
	0.1988			0.955396		0.979411		0.966811		0.977432
	0.1989			0.955419		0.979439		0.966839		0.977456
	0.199			0.955442		0.979467		0.966865		0.977481
	0.1991			0.955466		0.979495		0.966892		0.977506
	0.1992			0.955489		0.979525		0.966918		0.977532
	0.1993			0.955512		0.979554		0.966944		0.977558
	0.1994			0.955536		0.979584		0.966971		0.977583
	0.1995			0.95556		0.97961		0.966997		0.977608
	0.1996			0.955585		0.979636		0.967022		0.977633
	0.1997			0.955609		0.979662		0.967048		0.977659
[truncated: 3,413 more rows]

## Sheet: Figure 2D
Table 2: Quantification of the neurotransmitter release parameters in STX1-null neurons lentivirally transdicuced with STX1A-STX2 chimeras
Parameter measured	Statistical test	Genotype	Number of independent cultures	Number of observations	Parametric distribution 'D'Agostino & Pearson test'	Mean	SEM	Minimum	25% Percentile	Median	75% Percentile	Maximum	Mean ranks	Adjusted p-value (vs WT)
EPSC half width (ms)	Kruskal-Wallis; Dunn's post-hoc	STX1A	4	58	No	5.453	0.1629	3.28	4.578	5.36	5.968	9.64	99.41
		STX1A-2(SNARE)	4	51	No	5.769	0.2168	3.9	4.89	5.4	6.09	13.09	111	>0.999
		STX1A-2(Nter)	4	52	No	5.536	0.2347	2.53	4.425	5.17	6.405	10.98	98.6	>0.999
		STX1A-2(Cter)	4	52	No	5.959	0.2214	3.81	5.115	5.63	6.425	12.43	119.9	0.4895

## Sheet: Figure 2E
Table 2: Quantification of the neurotransmitter release parameters in STX1-null neurons lentivirally transdicuced with STX1A-STX2 chimeras
Parameter measured	Statistical test	Genotype	Number of independent cultures	Number of observations	Parametric distribution 'D'Agostino & Pearson test'	Mean	SEM	Minimum	25% Percentile	Median	75% Percentile	Maximum	Mean ranks	Adjusted p-value (vs WT)
mEPSC frequency (Hz)	Kruskal-Wallis; Dunn's post-hoc	STX1A	4	51	No	6.978	0.6209	0.8542	3.453	5.802	8.938	19.69	49.7
		STX1A-2(SNARE)	4	50	Yes	21.31	1.004	1.146	15.48	22.77	26.29	35.06	144.4	<0.0001
		STX1A-2(Nter)	4	53	No	11.8	1.128	0.25	5.292	9.688	19.27	36.27	81.34	0.0212
		STX1A-2(Cter)	4	51	Yes	20.28	1.059	2	16.21	21.42	25.49	34	136.1	<0.0001

## Sheet: Figure 2F
Table 2: Quantification of the neurotransmitter release parameters in STX1-null neurons lentivirally transdicuced with STX1A-STX2 chimeras
Parameter measured	Statistical test	Genotype	Number of independent cultures	Number of observations	Parametric distribution 'D'Agostino & Pearson test'	Mean	SEM	Minimum	25% Percentile	Median	75% Percentile	Maximum	Mean ranks	Adjusted p-value (vs WT)
RRP (nc)	Kruskal-Wallis; Dunn's post-hoc	STX1A	4	46	No	0.525	0.0641	0.03	0.225	0.41	0.6	2.04	118
		STX1A-2(SNARE)	4	40	No	0.1808	0.02723	0.02	0.08	0.12	0.265	0.87	55.95	<0.0001
		STX1A-2(Nter)	4	42	No	0.4621	0.06691	0.02	0.175	0.36	0.535	2.06	104.6	>0.999
		STX1A-2(Cter)	4	49	No	0.2429	0.02746	0.02	0.11	0.2	0.345	0.88	74.16	0.0002

## Sheet: Figure 2G
Table 2: Quantification of the neurotransmitter release parameters in STX1-null neurons lentivirally transdicuced with STX1A-STX2 chimeras
Parameter measured	Statistical test	Genotype	Number of independent cultures	Number of observations	Parametric distribution 'D'Agostino & Pearson test'	Mean	SEM	Minimum	25% Percentile	Median	75% Percentile	Maximum	Mean ranks	Adjusted p-value (vs WT)
PVR (%)	Kruskal-Wallis; Dunn's post-hoc	STX1A	4	43	No	12.76	1.28	1.23	6.95	9.55	15.46	43.56	67.91
		STX1A-2(SNARE)	4	40	Yes	17.79	1.394	2.97	11.78	16.43	24.99	41.34	98.79	0.0136
		STX1A-2(Nter)	4	40	No	15.2	1.42	2.25	7.898	12.66	20.92	43.51	82.82	0.5083
		STX1A-2(Cter)	4	48	Yes	18.15	1.615	3.95	8.86	15.49	24.79	46.96	94.19	0.0345

## Sheet: Figure 2H
Table 2: Quantification of the neurotransmitter release parameters in STX1-null neurons lentivirally transdicuced with STX1A-STX2 chimeras
Parameter measured	Statistical test	Genotype	Number of independent cultures	Number of observations	Parametric distribution 'D'Agostino & Pearson test'	Mean	SEM	Minimum	25% Percentile	Median	75% Percentile	Maximum	Mean ranks	Adjusted p-value (vs WT)
Spontaneous vesicular release rate (s-1)	Kruskal-Wallis; Dunn's post-hoc	STX1A	4	41	No	0.001784	0.0002011	0.0003	0.001005	0.0013	0.001905	0.00593	32.12
		STX1A-2(SNARE)	4	37	No	0.02989	0.003094	0.0057	0.01298	0.02841	0.04159	0.08899	136.6	<0.001
		STX1A-2(Nter)	4	41	No	0.004342	0.0005112	9e-05	0.00173	0.00404	0.006185	0.01371	58.76	0.0758
		STX1A-2(Cter)	4	48	No	0.01488	0.001573	0.0011	0.007435	0.0119	0.01921	0.06066	109.4	<0.001

## Sheet: Figure 2I
Table 2: Quantification of the neurotransmitter release parameters in STX1-null neurons lentivirally transdicuced with STX1A-STX2 chimeras
Parameter measured	Statistical test	Genotype	Number of independent cultures	Number of observations	Parametric distribution 'D'Agostino & Pearson test'	Mean	SEM	Minimum	25% Percentile	Median	75% Percentile	Maximum	Mean ranks	Adjusted p-value (vs WT)
EPSC2/EPSC1	Kruskal-Wallis; Dunn's post-hoc	STX1A	4	41	No	1.215	0.05888	0.73	0.87	1.1	1.505	2.5	141
		STX1A-2(SNARE)	4	37	No	0.715	0.03408	0.4	0.5675	0.705	0.825	1.78	57.53	<0.001
		STX1A-2(Nter)	4	41	No	0.9886	0.03746	0.52	0.83	0.97	1.13	1.93	118.4	0.1392
		STX1A-2(Cter)	4	48	No	0.7952	0.03856	0.33	0.615	0.75	0.905	1.59	74.54	<0.001

## Sheet: Figure 2J
Parameter measured	Stimulus number (x-axis)	Statistical test	Number of independent cultures	Number of observations	Mean	SEM	Number of observations	Mean	SEM	Adjusted p-value (vs WT)	Number of observations	Mean	SEM	Adjusted p-value (vs WT)	Number of observations	Mean	SEM	Adjusted p-value (vs WT)
				STX1A			STX1A-2(SNARE)				STX1A-2(Nter)				STX1A-2(Cter)
EPSC(X)/EPSC(1)	1	Mixed effect analysis	6	45	1	0	36	1	0	>0.9999	43	1	0	>0.9999	47	1	0	>0.9999
	2	Followed by Tukey's post-hoc			0.873778	0.0445236		0.609722	0.0237329	<0.0001		0.815116	0.024595	0.6304		0.669787	0.0235131	0.0001
	3				0.776222	0.0451957		0.506944	0.021554	<0.0001		0.703488	0.0265242	0.1157		0.557234	0.0296506	<0.0001
	4				0.752	0.0591622		0.4375	0.0270314	<0.0001		0.642558	0.0363691	0.4491		0.515745	0.0297876	<0.0001
	5				0.692	0.0489161		0.428333	0.0249428	<0.0001		0.609767	0.0305187	0.1157		0.489362	0.0304505	<0.0001
	6				0.678889	0.0562258		0.412778	0.0239298	<0.0001		0.574884	0.0302085	0.3373		0.484894	0.0342811	0.0001
	7				0.642667	0.0488105		0.3975	0.0249869	<0.0001		0.554419	0.0283572	0.1475		0.466596	0.0313603	0.0003
	8				0.65	0.0430644		0.385556	0.0203089	<0.0001		0.546047	0.0319453	0.2748		0.478298	0.0283126	0.0014
	9				0.649111	0.0432199		0.368889	0.0187751	<0.0001		0.555581	0.0336375	0.1478		0.47	0.0303739	0.002
	10				0.635333	0.0476282		0.384444	0.0261966	<0.0001		0.534186	0.0295242	0.2262		0.457021	0.026642	0.0011
	11				0.631556	0.0427832		0.379167	0.0190462	<0.0001		0.540698	0.0294098	0.25		0.468723	0.0275295	0.0039
	12				0.626222	0.0415487		0.364167	0.020799	<0.0001		0.544186	0.0319524	0.3395		0.476383	0.031874	0.0098
	13				0.649556	0.04991		0.379167	0.020534	<0.0001		0.536744	0.0291818	0.0988		0.461277	0.0270208	0.0005
	14				0.639556	0.047637		0.365278	0.0194834	<0.0001		0.544186	0.0344748	0.2106		0.46	0.0312135	0.0011
	15				0.660889	0.0525134		0.37	0.0206405	<0.0001		0.531395	0.030824	0.0417		0.454468	0.027471	0.0001
	16				0.656667	0.0559365		0.377222	0.020192	<0.0001		0.537209	0.0285674	0.0712		0.457234	0.0306614	0.0002
	17				0.643778	0.0472018		0.362778	0.0213051	<0.0001		0.551395	0.0335473	0.2362		0.463404	0.0320849	0.001
	18				0.630889	0.0444186		0.341389	0.020737	<0.0001		0.53	0.028731	0.1684		0.45766	0.0306803	0.0018
	19				0.642222	0.0444028		0.359722	0.02302	<0.0001		0.536744	0.0314467	0.1383		0.452553	0.0269279	0.0005
	20				0.645111	0.0522046		0.346111	0.0229882	<0.0001		0.534651	0.032239	0.1103		0.450638	0.0251883	0.0003
	21				0.618889	0.0385026		0.359722	0.0196658	<0.0001		0.536512	0.0287731	0.3357		0.458298	0.0296157	0.0046
	22				0.640667	0.0455166		0.360278	0.022833	<0.0001		0.542791	0.0305384	0.1907		0.450851	0.0277141	0.0005
	23				0.651778	0.0477031		0.351111	0.0232201	<0.0001		0.532558	0.0300076	0.0721		0.449574	0.0260576	0.0002
	24				0.640444	0.0474895		0.368889	0.0230589	<0.0001		0.54	0.0319121	0.1716		0.445745	0.0261228	0.0003
	25				0.625556	0.0425827		0.347222	0.0229893	<0.0001		0.540465	0.0346921	0.3067		0.445745	0.0292786	0.001
	26				0.644667	0.0480084		0.342222	0.0226117	<0.0001		0.532093	0.0342319	0.0999		0.434468	0.02568	<0.0001
	27				0.644444	0.0506259		0.357778	0.0231767	<0.0001		0.530465	0.0316857	0.0934		0.450851	0.0286754	0.0003
	28				0.622	0.0430593		0.365	0.0261573	<0.0001		0.543488	0.0303357	0.3794		0.447021	0.0257198	0.0015
	29				0.630444	0.0454706		0.3775	0.0241174	<0.0001		0.525814	0.0302632	0.1435		0.433617	0.0264583	0.0002
	30				0.628222	0.0484906		0.369722	0.0218708	<0.0001		0.522093	0.030218	0.1344		0.468298	0.0424823	0.0048
	31				0.641333	0.046936		0.363611	0.0210146	<0.0001		0.52907	0.0315716	0.1014		0.457234	0.0329812	0.0007
	32				0.654667	0.0544306		0.342222	0.0232895	<0.0001		0.528372	0.0316419	0.0497		0.448723	0.0312781	0.0001
	33				0.622444	0.0468569		0.346389	0.0226784	<0.0001		0.523023	0.0340502	0.179		0.428511	0.0266976	0.0003
	34				0.639556	0.0472816		0.346111	0.0232627	<0.0001		0.516279	0.0295444	0.0584		0.441489	0.0317148	0.0002
	35				0.621111	0.0508168		0.351111	0.0239701	<0.0001		0.534419	0.0329591	0.2903		0.425745	0.0262676	0.0003
	36				0.626889	0.0458718		0.345	0.0218054	<0.0001		0.512093	0.0294308	0.0898		0.42766	0.0268208	0.0002
	37				0.618667	0.0475507		0.3175	0.0242977	<0.0001		0.544186	0.0349343	0.4275		0.44766	0.0326748	0.0021
	38				0.635556	0.052639		0.346667	0.0214328	<0.0001		0.515814	0.0298728	0.0702		0.427234	0.0277839	<0.0001
	39				0.634667	0.0463764		0.3425	0.0216259	<0.0001		0.518372	0.0317066	0.0834		0.443617	0.0300546	0.0004
	40				0.653778	0.0532426		0.339167	0.0248563	<0.0001		0.515581	0.0305909	0.0253		0.438298	0.0298211	<0.0001
	41				0.650444	0.0519751		0.3375	0.023816	<0.0001		0.517907	0.0329326	0.0352		0.421277	0.0298727	<0.0001
	42				0.627111	0.046275		0.341667	0.0247864	<0.0001		0.532791	0.0341327	0.2194		0.43766	0.0285936	0.0005
	43				0.633778	0.0484594		0.351389	0.025765	<0.0001		0.518605	0.0323748	0.0881		0.417447	0.0251884	<0.0001
	44				0.639556	0.0591001		0.335	0.0236056	<0.0001		0.531395	0.0361622	0.1226		0.432128	0.0282498	<0.0001
	45				0.636222	0.0530202		0.324444	0.0209703	<0.0001		0.506744	0.0297083	0.0418		0.441702	0.03391	0.0003
	46				0.615556	0.0487413		0.329444	0.0267616	<0.0001		0.538372	0.0405526	0.395		0.411489	0.0271733	0.0001
	47				0.636889	0.0546142		0.34	0.0250048	<0.0001		0.517209	0.0338803	0.0704		0.414043	0.0239944	<0.0001
	48				0.646	0.0532541		0.348611	0.0243557	<0.0001		0.51186	0.0311593	0.0321		0.426809	0.0298518	<0.0001
	49				0.633778	0.0531524		0.329167	0.0262901	<0.0001		0.508837	0.0306215	0.0535		0.428298	0.0296874	0.0001
	50				0.615778	0.0482591		0.325278	0.0236458	<0.0001		0.51814	0.0327686	0.1925		0.416809	0.0271871	0.0002
