# Supplementary material for: The stability of the primed pool of synaptic vesicles and the clamping of spontaneous neurotransmitter release rely on the integrity of the C-terminal half of the SNARE domain of syntaxin-1A
Source: eLife. 2024 Mar 21;12:RP90775. doi: 10.7554/eLife.90775 (PMC10957171; doi:10.7554/eLife.90775)
Supplement: Figure 3—figure supplement 1—source data 1. [file elife-90775-fig3-figsupp1-data1.xlsx]

## Sheet: F3 - fig. Supp. 1A
Table 1: Quantification of the neurotransmitter release parameters in STX1-null neurons lentivirally transdicuced with STX2-STX1A chimeras
Parameter measured	Statistical test	Genotype	Number of independent cultures	Number of observations	Parametric distribution 'D'Agostino & Pearson test'	Mean	SEM	Minimum	25% Percentile	Median	75% Percentile	Maximum	Mean ranks	Adjusted p-value (vs STX2-WT)
EPSC rise time (80-20%) (ms)	Kruskal-Wallis; Dunn's post-hoc	STX2	12	89	No	2.893	0.2026	0.3676	1.479	2.537	3.754	8.864	209.1
		STX2-1A(SNARE)	5	46	Yes	1.245	0.05292	0.624	0.9745	1.163	1.393	2.067	115.8	<0.0001
		STX2-1A(Nter)	5	35	Yes	2.356	0.1655	0.9205	1.556	2.267	2.889	4.904	212.5	>0.9999
		STX2-1A(Cter)	5	35	Yes	1.583	0.1054	0.1126	1.107	1.606	1.906	2.906	156.3	0.0302
		STX1A	12	102	No	1.167	0.04821	0.09826	0.8757	1.057	1.431	2.837	102.2	<0.0001

## Sheet: F3 - fig. Supp. 1B
Table 1: Quantification of the neurotransmitter release parameters in STX1-null neurons lentivirally transdicuced with STX2-STX1A chimeras
Parameter measured	Statistical test	Genotype	Number of independent cultures	Number of observations	Parametric distribution 'D'Agostino & Pearson test'	Mean	SEM	Minimum	25% Percentile	Median	75% Percentile	Maximum	Mean ranks	Adjusted p-value (vs STX2-WT)
EPSC decay time (20-80%) (ms)	Kruskal-Wallis; Dunn's post-hoc	STX2	12	97	No	33.06	2.8	0.607	12.99	23.81	44.93	119.3	226.8
		STX2-1A(SNARE)	5	48	No	10.62	0.4827	5.912	8.125	9.609	12.43	19.07	127.3	<0.0001
		STX2-1A(Nter)	5	38	Yes	24.77	1.951	6.343	15.16	21.84	32.34	50.29	237.3	>0.9999
		STX2-1A(Cter)	5	36	Yes	12.64	0.966	0.0969	8.527	12	17.13	22.79	151.9	0.0006
		STX1A	12	111	No	9.596	0.3282	3.956	7.012	9.118	11.75	20.82	108.3	<0.0001

## Sheet: F3 - fig. Supp. 1C
Table 1: Quantification of the neurotransmitter release parameters in STX1-null neurons lentivirally transdicuced with STX2-STX1A chimeras
Parameter measured	Statistical test	Genotype	Number of independent cultures	Number of observations	Parametric distribution 'D'Agostino & Pearson test'	Mean	SEM	Minimum	25% Percentile	Median	75% Percentile	Maximum	Mean ranks	Adjusted p-value (vs STX2-WT)
mEPSC amplitude (pA)	Kruskal-Wallis; Dunn's post-hoc	STX2	12	86	No	32.55	1.187	16.58	25.27	29.96	36.11	71.68	205.5
		STX2-1A(SNARE)	5	38	No	34.94	3.118	13.95	24	31.28	36.96	117	258.8	>0.9999
		STX2-1A(Nter)	5	35	Yes	34.86	1.707	17.12	27.08	34.06	41.82	58.88	262.8	>0.9999
		STX2-1A(Cter)	5	33	No	30.81	3.209	1.147	21.86	27.26	34.67	119	108.8	>0.9999
		STX1A	12	90	No	31.85	1.807	3.426	22.24	28.17	35.67	117.8	101.7	>0.9999

## Sheet: F3 - fig. Supp. 1D
Table 1: Quantification of the neurotransmitter release parameters in STX1-null neurons lentivirally transdicuced with STX2-STX1A chimeras
Parameter measured	Statistical test	Genotype	Number of independent cultures	Number of observations	Parametric distribution 'D'Agostino & Pearson test'	Mean	SEM	Minimum	25% Percentile	Median	75% Percentile	Maximum	Mean ranks	Adjusted p-value (vs STX2-WT)
mEPSC charge (pC)	Kruskal-Wallis; Dunn's post-hoc	STX2	12	87	No	110.6	5.426	38.09	75.08	101.9	132.2	263.8	151.2
		STX2-1A(SNARE)	5	36	Yes	120	6.332	47.23	89.24	114.2	142.2	196	126	>0.9999
		STX2-1A(Nter)	5	35	Yes	139.3	7.215	40.82	105.2	139.1	167.1	234.6	93.23	0.0042
		STX2-1A(Cter)	5	32	Yes	105.2	5.742	22.72	85.45	103.9	121	169.4	149.9	>0.9999
		STX1A	12	94	No	107.5	5.629	17.89	61.3	103.4	138.7	276.2	156.6	>0.9999

## Sheet: F3 - fig. Supp. 1E
Table 1: Quantification of the neurotransmitter release parameters in STX1-null neurons lentivirally transdicuced with STX2-STX1A chimeras
Parameter measured	Statistical test	Genotype	Number of independent cultures	Number of observations	Parametric distribution 'D'Agostino & Pearson test'	Mean	SEM	Minimum	25% Percentile	Median	75% Percentile	Maximum	Mean ranks	Adjusted p-value (vs STX2-WT)
mEPSC rise time (20-80%) (ms)	Kruskal-Wallis; Dunn's post-hoc	STX2	12	97	No	0.6207	0.01597	0.3416	0.488	0.6153	0.7344	0.9542	173.8
		STX2-1A(SNARE)	5	47	No	0.5198	0.01847	0.3517	0.4301	0.4876	0.5716	0.9817	109.2	0.0011
		STX2-1A(Nter)	5	37	Yes	0.7055	0.03247	0.3364	0.5554	0.7119	0.8094	1.22	213.7	0.2732
		STX2-1A(Cter)	5	37	Yes	0.5966	0.02434	0.3581	0.4429	0.6161	0.708	0.944	158.4	>0.9999
		STX1A	12	106	No	0.5941	0.01282	0.3338	0.4782	0.5969	0.6943	0.9028	159.4	>0.9999

## Sheet: F3 - fig. Supp. 1F
Table 1: Quantification of the neurotransmitter release parameters in STX1-null neurons lentivirally transdicuced with STX2-STX1A chimeras
Parameter measured	Statistical test	Genotype	Number of independent cultures	Number of observations	Parametric distribution 'D'Agostino & Pearson test'	Mean	SEM	Minimum	25% Percentile	Median	75% Percentile	Maximum	Adjusted p-value (vs STX2-WT)
mEPSC half width (8ß-2ß%) (ms)	Ordinary one-way ANOVA	STX2	12	99	Yes	3.202	0.03484	2.258	2.987	3.242	3.466	3.906
		STX2-1A(SNARE)	5	47	Yes	3.311	0.0586	2.443	3.023	3.337	3.529	4.193	0.5231
		STX2-1A(Nter)	5	43	Yes	3.47	0.06269	2.68	3.23	3.466	3.709	4.31	0.003
		STX2-1A(Cter)	5	39	Yes	3.268	0.07965	2.401	2.858	3.197	3.667	4.238	0.668
		STX1A	12	114	Yes	3.385	0.03796	2.419	3.036	3.458	3.634	4.323	0.0087

## Sheet: F3 - fig. Supp. 1G
Table 1: Quantification of the neurotransmitter release parameters in STX1-null neurons lentivirally transdicuced with STX2-STX1A chimeras
Parameter measured	Statistical test	Genotype	Number of independent cultures	Number of observations	Parametric distribution 'D'Agostino & Pearson test'	Mean	SEM	Minimum	25% Percentile	Median	75% Percentile	Maximum	Mean ranks	Adjusted p-value (vs STX2-WT)
mEPSC decay (80-20%) (ms)	Kruskal-Wallis; Dunn's post-hoc	STX2	12	99	No	5.626	0.1116	3.532	4.685	5.79	6.548	7.617	187.7
		STX2-1A(SNARE)	5	47	No	4.45	0.1099	3.7	3.981	4.225	4.564	6.854	84.21	<0.0001
		STX2-1A(Nter)	5	43	No	5.736	0.1658	3.561	4.515	5.993	6.665	7.278	196.5	>0.9999
		STX2-1A(Cter)	5	39	No	5.274	0.17	3.627	4.346	4.972	6.15	7.456	158.2	>0.9999
		STX1A	12	114	No	5.617	0.1042	3.686	4.59	5.554	6.67	7.438	188.5	>0.9999
