# Supplementary material for: The stability of the primed pool of synaptic vesicles and the clamping of spontaneous neurotransmitter release rely on the integrity of the C-terminal half of the SNARE domain of syntaxin-1A
Source: eLife. 2024 Mar 21;12:RP90775. doi: 10.7554/eLife.90775 (PMC10957171; doi:10.7554/eLife.90775)
Supplement: Figure 3—source data 1. [file elife-90775-fig3-data1.xlsx]

## Sheet: Figure 3B
Table 1: Quantification of the neurotransmitter release parameters in STX1-null neurons lentivirally transdicuced with STX2-STX1A chimeras
Parameter measured	Statistical test	Genotype	Number of independent cultures	Number of observations	Parametric distribution 'D'Agostino & Pearson test'	Mean	SEM	Minimum	25% Percentile	Median	75% Percentile	Maximum	Mean ranks	Adjusted p-value (vs STX2-WT)
EPSC Amplitude (nA)	Kruskal-Wallis; Dunn's post-hoc	STX2	12	111	No	0.3548	0.04176	0	0.08133	0.1968	0.4127	2.574	292.5
		STX2-1A(SNARE)	5	47	No	2.623	0.289	0.001791	1.124	2.373	3.94	9.622	132.5	<0.0001
		STX2-1A(Nter)	5	52	No	0.6854	0.08484	0.001795	0.2036	0.5431	0.87	2.26	243.7	0.0996
		STX2-1A(Cter)	5	51	No	1.134	0.28	0.01378	0.1721	0.5781	1.156	12.39	228.3	0.0077
		STX1A	12	129	No	4.062	0.3169	0.02266	1.472	3.025	5.363	18.05	102.6	<0.0001

## Sheet: Figure 3C
Parameter measured	Time (x-axis)	Number of independent cultures	Number of observations	Mean	Number of observations	Mean	Number of observations	Mean	Number of observations	Mean	Number of observations	Mean
Cumulative charge transfer			STX2		STX2-1A(SNARE)		STX2-1A(Nter)		STX2-1A(Cter)		STX1A
	0	As stated in F3B	111	0.0165882	47	0.00308106	52	1.58388e-05	51	0.00489185	129	0.000399258
	0.0001			0.0211308		0.00442593		7.32022e-05		0.00585721		0.00055992
	0.0002			0.0262659		0.0061878		0.000174997		0.00689707		0.000741125
	0.0003			0.0320002		0.00835282		0.000600501		0.00804045		0.00101363
	0.0004			0.0383458		0.0109335		0.00114173		0.00940905		0.00132321
	0.0005			0.0452582		0.0139248		0.001789		0.0109386		0.00169653
	0.0006			0.0526864		0.0173312		0.00265285		0.0126476		0.00211847
	0.0007			0.0605916		0.0211344		0.00366107		0.0145655		0.00259491
	0.0008			0.0689318		0.0253125		0.00484594		0.01676		0.003123
	0.0009			0.0776605		0.0298579		0.00623097		0.019195		0.00371377
	0.001			0.0867317		0.0347559		0.00779109		0.0218646		0.00437091
	0.0011			0.096106		0.0399783		0.00954268		0.0247898		0.00508806
	0.0012			0.105754		0.0454978		0.0114722		0.0279851		0.00587381
	0.0013			0.115628		0.0512842		0.0135643		0.0314558		0.00676828
	0.0014			0.125692		0.0573165		0.0158292		0.0351849		0.00780102
	0.0015			0.135906		0.0635667		0.0182753		0.0391653		0.00891582
	0.0016			0.146232		0.0700142		0.020922		0.0433957		0.0101151
	0.0017			0.156637		0.0766372		0.0237379		0.0478687		0.0113954
	0.0018			0.167089		0.0834085		0.0266992		0.0525742		0.0127649
	0.0019			0.177561		0.0903036		0.0298189		0.0575033		0.0142077
	0.002			0.188027		0.0973107		0.033085		0.0626342		0.0157303
	0.0021			0.198466		0.104418		0.0364904		0.0679599		0.0173556
	0.0022			0.208856		0.111609		0.0400283		0.0734587		0.0190553
	0.0023			0.219178		0.118872		0.0436835		0.0791142		0.020839
	0.0024			0.229416		0.126192		0.0474643		0.084919		0.0227036
	0.0025			0.239556		0.133548		0.0513489		0.0908624		0.0246373
	0.0026			0.249584		0.140927		0.0553248		0.0969211		0.0266419
	0.0027			0.259492		0.148321		0.0593845		0.103081		0.0287129
	0.0028			0.269277		0.155715		0.0635253		0.109322		0.030841
	0.0029			0.278927		0.163097		0.0677249		0.115643		0.0330247
	0.003			0.288438		0.170463		0.0719625		0.12203		0.0352806
	0.0031			0.297802		0.177803		0.0762373		0.128469		0.0375771
	0.0032			0.30702		0.185109		0.0805431		0.134953		0.0399211
	0.0033			0.316087		0.192377		0.0848661		0.141462		0.042308
	0.0034			0.325002		0.199604		0.089218		0.147992		0.0447295
	0.0035			0.333768		0.20678		0.0935924		0.154521		0.0471863
	0.0036			0.342385		0.213906		0.0979662		0.161047		0.0496864
	0.0037			0.350853		0.220977		0.102338		0.167561		0.0522226
	0.0038			0.359171		0.227987		0.106714		0.174063		0.0547918
	0.0039			0.367343		0.234928		0.111082		0.180547		0.057391
	0.004			0.375368		0.241796		0.115443		0.187008		0.0600214
	0.0041			0.383247		0.248593		0.119802		0.193432		0.0626822
	0.0042			0.390982		0.255314		0.124156		0.199808		0.0653633
	0.0043			0.398577		0.261958		0.128487		0.206139		0.0680526
	0.0044			0.40603		0.26853		0.132808		0.21242		0.0707552
	0.0045			0.413346		0.275027		0.137103		0.218653		0.0734715
	0.0046			0.420529		0.281444		0.141386		0.224827		0.0762006
	0.0047			0.42758		0.28778		0.145636		0.230941		0.0789399
	0.0048			0.434502		0.294038		0.149828		0.237006		0.0816844
	0.0049			0.441299		0.300218		0.154001		0.243013		0.0844434
	0.005			0.447971		0.306316		0.158145		0.248962		0.0872058
	0.0051			0.45452		0.312335		0.162254		0.25485		0.0899709
	0.0052			0.460948		0.318275		0.166329		0.260675		0.0927448
	0.0053			0.467261		0.324133		0.170375		0.266429		0.0955221
	0.0054			0.47346		0.329911		0.174399		0.272109		0.0982929
	0.0055			0.479547		0.335611		0.178401		0.277718		0.101057
	0.0056			0.485523		0.34123		0.182356		0.283265		0.103816
	0.0057			0.491392		0.346777		0.186267		0.288751		0.106567
	0.0058			0.497155		0.352249		0.190147		0.294166		0.109319
	0.0059			0.502816		0.35764		0.193997		0.299511		0.112074
	0.006			0.508375		0.362951		0.197809		0.304793		0.114825
	0.0061			0.513836		0.368188		0.201583		0.310009		0.117567
	0.0062			0.5192		0.373352		0.20533		0.315155		0.120297
	0.0063			0.524472		0.378442		0.209044		0.320238		0.123021
	0.0064			0.52965		0.383459		0.212739		0.325261		0.125738
	0.0065			0.534735		0.388402		0.216382		0.330216		0.128449
	0.0066			0.53973		0.39327		0.21999		0.335103		0.131146
	0.0067			0.54464		0.39807		0.223557		0.339931		0.133835
	0.0068			0.549464		0.402802		0.227094		0.344695		0.136513
	0.0069			0.554204		0.407462		0.230598		0.349394		0.13918
	0.007			0.558863		0.412055		0.234066		0.354034		0.141834
	0.0071			0.563444		0.416582		0.237505		0.358607		0.144471
	0.0072			0.567946		0.421044		0.240901		0.36312		0.147096
	0.0073			0.57237		0.42544		0.24427		0.367569		0.149708
	0.0074			0.576718		0.429766		0.247608		0.371957		0.152308
	0.0075			0.58099		0.434026		0.250916		0.376283		0.154896
	0.0076			0.585189		0.438227		0.254214		0.380545		0.157473
	0.0077			0.589316		0.442364		0.257492		0.384748		0.160042
	0.0078			0.593373		0.446439		0.260735		0.388888		0.162598
	0.0079			0.597363		0.450453		0.263944		0.392971		0.16514
	0.008			0.601287		0.454405		0.267109		0.396997		0.167669
	0.0081			0.605143		0.458299		0.270239		0.400964		0.170177
	0.0082			0.608934		0.462139		0.27334		0.404871		0.172666
	0.0083			0.612663		0.465918		0.276408		0.408721		0.175141
	0.0084			0.616331		0.469641		0.279444		0.412511		0.1776
	0.0085			0.619939		0.473309		0.282434		0.416247		0.180047
	0.0086			0.623486		0.476923		0.28539		0.419936		0.182477
	0.0087			0.626975		0.480488		0.288328		0.423572		0.184886
	0.0088			0.630406		0.484005		0.291235		0.427165		0.187283
	0.0089			0.63378		0.487473		0.294107		0.430704		0.189665
	0.009			0.637103		0.490889		0.296957		0.434192		0.192035
	0.0091			0.64037		0.494255		0.299786		0.437632		0.194387
	0.0092			0.643586		0.497574		0.302587		0.44103		0.196731
	0.0093			0.646752		0.500848		0.305361		0.444379		0.199065
	0.0094			0.649867		0.504072		0.308113		0.447686		0.201385
	0.0095			0.652931		0.50725		0.310831		0.450944		0.20369
	0.0096			0.655949		0.510383		0.313528		0.45416		0.205971
	0.0097			0.658918		0.513473		0.316195		0.457333		0.208234
	0.0098			0.661841		0.516519		0.318834		0.460468		0.210481
	0.0099			0.66472		0.519521		0.321455		0.463566		0.212705
	0.01			0.667555		0.522482		0.324059		0.466624		0.214909
	0.0101			0.670346		0.525405		0.326644		0.469638		0.217096
	0.0102			0.673093		0.528289		0.329199		0.472611		0.219264
	0.0103			0.675799		0.531133		0.331732		0.475549		0.221415
	0.0104			0.678464		0.533936		0.334231		0.478447		0.223549
	0.0105			0.681088		0.536698		0.336706		0.481305		0.225669
	0.0106			0.683671		0.539423		0.339166		0.484131		0.227771
	0.0107			0.686214		0.542108		0.341592		0.486916		0.229857
	0.0108			0.688719		0.544756		0.344		0.489664		0.231926
	0.0109			0.691187		0.54737		0.346377		0.492378		0.233981
	0.011			0.693619		0.549947		0.348726		0.495052		0.236024
	0.0111			0.696013		0.55249		0.351049		0.497694		0.238053
	0.0112			0.698371		0.555003		0.353346		0.5003		0.24007
	0.0113			0.700696		0.557484		0.355637		0.502876		0.242067
	0.0114			0.702986		0.559933		0.357911		0.505426		0.24405
	0.0115			0.705243		0.56235		0.360152		0.507945		0.246017
	0.0116			0.707468		0.564739		0.36238		0.510434		0.247973
	0.0117			0.709661		0.567102		0.364591		0.512887		0.249919
	0.0118			0.71182		0.569434		0.366767		0.515307		0.251852
	0.0119			0.713949		0.571734		0.368932		0.517695		0.253771
	0.012			0.716048		0.574005		0.371087		0.520054		0.255679
	0.0121			0.718117		0.576248		0.373221		0.522379		0.257573
	0.0122			0.720155		0.578461		0.375321		0.524666		0.259454
	0.0123			0.722168		0.580643		0.377399		0.526932		0.261326
	0.0124			0.724151		0.582797		0.37947		0.529172		0.263185
	0.0125			0.726106		0.584924		0.381523		0.531382		0.265024
	0.0126			0.728035		0.587029		0.383556		0.533563		0.266844
	0.0127			0.729938		0.58911		0.385585		0.535712		0.268652
	0.0128			0.731814		0.59117		0.387605		0.53783		0.270444
	0.0129			0.733663		0.593203		0.389611		0.539921		0.272221
	0.013			0.735486		0.59521		0.391598		0.541987		0.273981
	0.0131			0.737282		0.597193		0.393564		0.544021		0.275732
	0.0132			0.739054		0.59915		0.395529		0.54603		0.277468
	0.0133			0.740802		0.601081		0.397489		0.548021		0.279192
	0.0134			0.742526		0.602991		0.399438		0.549994		0.280906
	0.0135			0.744227		0.604879		0.401373		0.551944		0.282613
	0.0136			0.745904		0.606739		0.403285		0.553869		0.284302
	0.0137			0.747559		0.608575		0.405177		0.555771		0.285981
	0.0138			0.749194		0.610389		0.407056		0.557648		0.28765
	0.0139			0.750807		0.612179		0.408921		0.559505		0.289299
	0.014			0.752398		0.613946		0.410753		0.561339		0.290937
	0.0141			0.753967		0.615692		0.412573		0.563152		0.292565
	0.0142			0.755515		0.617416		0.414382		0.564947		0.294183
	0.0143			0.757042		0.61912		0.416172		0.566725		0.295783
	0.0144			0.758549		0.620801		0.41794		0.568485		0.297376
	0.0145			0.760035		0.62246		0.419709		0.570228		0.298958
	0.0146			0.761502		0.624098		0.421469		0.571955		0.300531
	0.0147			0.76295		0.625717		0.423211		0.573663		0.302093
	0.0148			0.764378		0.627319		0.424933		0.575356		0.303645
	0.0149			0.765786		0.628902		0.426644		0.577026		0.305181
	0.015			0.767178		0.630467		0.428337		0.578679		0.306703
	0.0151			0.768549		0.632016		0.430019		0.580312		0.308223
	0.0152			0.769905		0.633548		0.431698		0.581925		0.309727
	0.0153			0.771245		0.635058		0.433354		0.583519		0.31122
	0.0154			0.772565		0.63655		0.435002		0.585091		0.312702
	0.0155			0.773868		0.638022		0.436644		0.586644		0.31417
	0.0156			0.775154		0.63948		0.438276		0.588183		0.315625
	0.0157			0.776423		0.640919		0.439897		0.589701		0.317071
	0.0158			0.777676		0.64234		0.4415		0.591195		0.318501
	0.0159			0.778911		0.643743		0.443109		0.592676		0.319928
	0.016			0.780133		0.645133		0.444693		0.594142		0.321347
	0.0161			0.781337		0.646509		0.44627		0.595597		0.322757
	0.0162			0.782524		0.647867		0.447848		0.597036		0.324161
	0.0163			0.783698		0.649206		0.449404		0.59846		0.325556
	0.0164			0.784857		0.650534		0.450945		0.59987		0.326941
	0.0165			0.786002		0.651848		0.452466		0.601268		0.328312
	0.0166			0.787134		0.653148		0.453981		0.602646		0.32968
	0.0167			0.788253		0.654432		0.455472		0.604017		0.331032
	0.0168			0.789359		0.655704		0.456955		0.605377		0.33237
	0.0169			0.790449		0.656963		0.458441		0.606728		0.333702
	0.017			0.791529		0.658206		0.459905		0.608061		0.335024
	0.0171			0.792595		0.659433		0.461365		0.609378		0.336335
	0.0172			0.793648		0.660649		0.462807		0.610684		0.337639
	0.0173			0.794688		0.661854		0.46423		0.611982		0.338936
	0.0174			0.795717		0.663043		0.46565		0.61327		0.340228
	0.0175			0.796735		0.664216		0.467056		0.614541		0.341514
	0.0176			0.797739		0.665375		0.468453		0.615799		0.342797
	0.0177			0.798731		0.66652		0.469837		0.61704		0.344069
	0.0178			0.799712		0.667656		0.471214		0.618264		0.345331
	0.0179			0.800681		0.668785		0.472567		0.619477		0.34659
	0.018			0.801638		0.669901		0.473908		0.620679		0.347844
	0.0181			0.802584		0.671006		0.475234		0.62187		0.349089
	0.0182			0.803518		0.672104		0.476559		0.623043		0.350325
	0.0183			0.804442		0.673193		0.477881		0.624202		0.351551
	0.0184			0.805353		0.674269		0.479176		0.625352		0.352772
	0.0185			0.806254		0.675332		0.480453		0.626486		0.353979
	0.0186			0.807145		0.676387		0.481721		0.627617		0.355185
	0.0187			0.808025		0.67743		0.48298		0.628733		0.356392
	0.0188			0.808895		0.678461		0.484226		0.629835		0.357588
	0.0189			0.809756		0.679479		0.485448		0.630926		0.358776
	0.019			0.810607		0.680486		0.486654		0.632004		0.359963
	0.0191			0.811448		0.681487		0.487854		0.633074		0.361146
	0.0192			0.812283		0.682478		0.489049		0.634136		0.362322
	0.0193			0.813107		0.683458		0.490248		0.635192		0.363488
	0.0194			0.813919		0.684428		0.491432		0.636232		0.364646
	0.0195			0.814725		0.685391		0.492614		0.637257		0.365803
	0.0196			0.81552		0.686348		0.4938		0.638272		0.366954
	0.0197			0.816307		0.687298		0.494976		0.639282		0.368097
	0.0198			0.817087		0.68824		0.496153		0.640284		0.369228
	0.0199			0.817856		0.68917		0.497319		0.641275		0.37035
	0.02			0.818617		0.690096		0.49848		0.642263		0.371465
	0.0201			0.81937		0.691015		0.499632		0.643243		0.372583
	0.0202			0.820116		0.691926		0.50077		0.644216		0.37369
	0.0203			0.820853		0.692826		0.501917		0.645178		0.374794
	0.0204			0.821583		0.693723		0.50305		0.646134		0.375893
	0.0205			0.822306		0.694611		0.504174		0.647081		0.376981
	0.0206			0.82302		0.695493		0.505271		0.648017		0.378066
	0.0207			0.823728		0.696369		0.506372		0.648946		0.379148
	0.0208			0.824427		0.697236		0.507457		0.649867		0.380222
	0.0209			0.825117		0.698094		0.508535		0.650778		0.381294
	0.021			0.825801		0.698947		0.509606		0.651677		0.382359
	0.0211			0.826479		0.699792		0.510677		0.652573		0.383414
	0.0212			0.827149		0.70063		0.511738		0.653461		0.384469
	0.0213			0.827813		0.70146		0.51278		0.65434		0.385519
	0.0214			0.82847		0.702282		0.513814		0.655207		0.386561
	0.0215			0.829121		0.703098		0.514835		0.65607		0.3876
	0.0216			0.829766		0.703906		0.515845		0.656923		0.388633
	0.0217			0.830404		0.704707		0.516855		0.657774		0.389659
	0.0218			0.831035		0.705503		0.517855		0.658614		0.390687
	0.0219			0.831662		0.706291		0.518846		0.659446		0.391713
	0.022			0.832281		0.707072		0.519826		0.660272		0.392729
	0.0221			0.832895		0.707846		0.520814		0.661092		0.39374
	0.0222			0.833503		0.708612		0.521812		0.6619		0.394741
	0.0223			0.834105		0.709376		0.522793		0.662706		0.395735
	0.0224			0.834702		0.710136		0.523769		0.66351		0.396726
	0.0225			0.835292		0.710889		0.52473		0.664298		0.39771
	0.0226			0.835875		0.711633		0.525683		0.665079		0.398689
	0.0227			0.836453		0.712373		0.526616		0.665859		0.399666
	0.0228			0.837027		0.713109		0.527547		0.666628		0.400637
	0.0229			0.837595		0.71384		0.528485		0.667398		0.401604
	0.023			0.838156		0.714566		0.529414		0.668162		0.402567
	0.0231			0.838714		0.715289		0.530338		0.668921		0.403525
	0.0232			0.839267		0.716002		0.531256		0.669673		0.404481
	0.0233			0.839813		0.716714		0.53217		0.67042		0.405436
	0.0234			0.840352		0.717421		0.533082		0.671167		0.406387
	0.0235			0.840887		0.718126		0.533996		0.671907		0.40733
	0.0236			0.841417		0.718825		0.534917		0.672634		0.408264
	0.0237			0.841941		0.719518		0.53583		0.673364		0.409197
	0.0238			0.84246		0.720206		0.536733		0.674088		0.41013
	0.0239			0.842975		0.720888		0.537628		0.674803		0.411051
	0.024			0.843484		0.721565		0.538536		0.675509		0.411963
	0.0241			0.843989		0.722234		0.539412		0.676202		0.412874
	0.0242			0.84449		0.722896		0.540305		0.676889		0.413783
	0.0243			0.844987		0.723556		0.541204		0.677575		0.414687
	0.0244			0.845478		0.72421		0.542095		0.678253		0.415584
	0.0245			0.845963		0.724858		0.54298		0.678925		0.416479
	0.0246			0.846446		0.725499		0.543862		0.679595		0.417374
	0.0247			0.846926		0.726136		0.544724		0.680263		0.418258
	0.0248			0.8474		0.726766		0.545581		0.680925		0.419137
	0.0249			0.847871		0.727391		0.546437		0.681576		0.420004
	0.025			0.848337		0.72801		0.547288		0.682227		0.420867
	0.0251			0.848798		0.728621		0.548132		0.682867		0.421731
	0.0252			0.849255		0.729226		0.548969		0.683506		0.42259
	0.0253			0.849708		0.729826		0.549808		0.684144		0.42344
	0.0254			0.850157		0.730423		0.550643		0.684781		0.424286
	0.0255			0.850601		0.731018		0.551468		0.685415		0.425131
	0.0256			0.851041		0.731604		0.552295		0.686047		0.42597
	0.0257			0.851478		0.732185		0.55311		0.686678		0.426804
	0.0258			0.851912		0.732764		0.55392		0.687303		0.427631
	0.0259			0.852343		0.733337		0.554724		0.687929		0.428453
	0.026			0.852769		0.7339		0.55553		0.688549		0.429268
	0.0261			0.853193		0.73446		0.556323		0.68916		0.430084
	0.0262			0.853614		0.735017		0.557107		0.689766		0.430891
	0.0263			0.85403		0.735569		0.55789		0.690376		0.431696
	0.0264			0.854442		0.736116		0.558665		0.690981		0.432503
	0.0265			0.854852		0.736656		0.559438		0.691578		0.433305
	0.0266			0.85526		0.737193		0.560199		0.692169		0.434104
	0.0267			0.855663		0.737726		0.560951		0.692759		0.434902
	0.0268			0.856063		0.738256		0.561693		0.693348		0.435693
	0.0269			0.856458		0.738782		0.562428		0.693928		0.436484
	0.027			0.856852		0.739305		0.563152		0.694506		0.437275
	0.0271			0.857243		0.739827		0.563877		0.69508		0.438068
	0.0272			0.85763		0.740344		0.56461		0.69565		0.43886
	0.0273			0.858014		0.740858		0.56533		0.696215		0.43965
	0.0274			0.858397		0.741368		0.566046		0.696781		0.440433
	0.0275			0.858776		0.741872		0.566753		0.697342		0.441209
	0.0276			0.859151		0.742372		0.567462		0.697899		0.441978
	0.0277			0.859521		0.742867		0.568158		0.698455		0.442748
	0.0278			0.859889		0.743357		0.568859		0.699007		0.443517
	0.0279			0.860256		0.743847		0.569556		0.699553		0.444282
	0.028			0.860618		0.744333		0.570249		0.700097		0.445043
	0.0281			0.860976		0.744814		0.570936		0.700639		0.445804
	0.0282			0.861331		0.745295		0.571618		0.701182		0.446561
	0.0283			0.861685		0.745773		0.572294		0.701716		0.447313
	0.0284			0.862034		0.746247		0.572976		0.702251		0.448058
	0.0285			0.862381		0.746719		0.57365		0.702784		0.448805
	0.0286			0.862726		0.747185		0.574315		0.703308		0.449547
	0.0287			0.863069		0.747649		0.574977		0.703827		0.450283
	0.0288			0.863408		0.748108		0.575636		0.704347		0.451018
	0.0289			0.863746		0.748567		0.57629		0.704861		0.451748
	0.029			0.864082		0.749023		0.576947		0.705378		0.452472
	0.0291			0.864414		0.749476		0.577584		0.705888		0.453195
	0.0292			0.864743		0.749928		0.578218		0.706391		0.453922
	0.0293			0.865071		0.750377		0.578869		0.706895		0.454641
	0.0294			0.865397		0.750821		0.579515		0.707397		0.455358
	0.0295			0.865719		0.751266		0.580153		0.707892		0.456076
	0.0296			0.866039		0.751706		0.580796		0.708384		0.456792
	0.0297			0.866356		0.752144		0.581436		0.708868		0.457502
	0.0298			0.866672		0.752583		0.58209		0.709349		0.458208
	0.0299			0.866986		0.75302		0.582738		0.709828		0.458915
	0.03			0.867297		0.753455		0.583384		0.710307		0.459622
	0.0301			0.867606		0.753885		0.584038		0.710785		0.460326
	0.0302			0.867914		0.754313		0.584681		0.711256		0.46102
	0.0303			0.868218		0.754738		0.585318		0.711725		0.461711
	0.0304			0.868521		0.755164		0.585956		0.712197		0.462404
	0.0305			0.86882		0.755587		0.586592		0.712661		0.463092
	0.0306			0.869118		0.756008		0.587235		0.713125		0.463776
	0.0307			0.869414		0.756428		0.587888		0.713588		0.464456
	0.0308			0.869709		0.756848		0.588532		0.714051		0.465138
	0.0309			0.870001		0.757267		0.589169		0.714512		0.465816
	0.031			0.870292		0.757682		0.589806		0.714968		0.46649
	0.0311			0.870579		0.758091		0.59043		0.715417		0.467164
	0.0312			0.870865		0.758496		0.591066		0.715864		0.467831
	0.0313			0.871152		0.758903		0.591705		0.716308		0.468495
	0.0314			0.871437		0.759308		0.592346		0.71675		0.469158
	0.0315			0.871717		0.759713		0.59298		0.717188		0.469814
	0.0316			0.871996		0.760113		0.593611		0.717617		0.470466
	0.0317			0.872274		0.760513		0.594253		0.718054		0.47112
	0.0318			0.87255		0.76091		0.594884		0.718493		0.471774
	0.0319			0.872823		0.761308		0.595503		0.718927		0.472432
	0.032			0.873094		0.761705		0.596125		0.719354		0.473077
	0.0321			0.873365		0.762101		0.59675		0.719774		0.473717
	0.0322			0.873634		0.762497		0.597364		0.720191		0.474353
	0.0323			0.873901		0.762893		0.597966		0.720604		0.474984
	0.0324			0.874167		0.763287		0.598561		0.721019		0.475613
	0.0325			0.87443		0.763676		0.599146		0.721429		0.476236
	0.0326			0.874691		0.764061		0.599742		0.721837		0.476861
	0.0327			0.87495		0.764446		0.600334		0.722243		0.477484
	0.0328			0.875208		0.764829		0.600923		0.722649		0.478107
	0.0329			0.875464		0.765213		0.601503		0.723049		0.478726
	0.033			0.875718		0.765594		0.602076		0.723445		0.479345
	0.0331			0.875969		0.765972		0.602656		0.723839		0.479959
	0.0332			0.876218		0.766347		0.603233		0.724231		0.480574
	0.0333			0.876465		0.766722		0.603808		0.724618		0.481187
	0.0334			0.876712		0.767095		0.60439		0.725005		0.481798
	0.0335			0.876957		0.767464		0.604957		0.725392		0.482405
	0.0336			0.877199		0.767829		0.60552		0.725775		0.48301
	0.0337			0.877441		0.768196		0.606086		0.726154		0.483613
	0.0338			0.877682		0.768563		0.60665		0.726533		0.48421
	0.0339			0.87792		0.768925		0.607211		0.726909		0.484801
	0.034			0.878157		0.769288		0.607771		0.727294		0.485401
	0.0341			0.878391		0.769649		0.608326		0.727675		0.485999
	0.0342			0.878623		0.770006		0.608887		0.728049		0.486592
	0.0343			0.878856		0.770364		0.609437		0.728426		0.48718
	0.0344			0.879087		0.77072		0.60999		0.7288		0.487769
	0.0345			0.879315		0.771075		0.610533		0.729169		0.488356
	0.0346			0.879543		0.771427		0.611074		0.729537		0.488941
	0.0347			0.879771		0.771778		0.611617		0.729904		0.48953
	0.0348			0.879997		0.772124		0.612163		0.730275		0.490113
	0.0349			0.880221		0.772465		0.612707		0.730643		0.490697
	0.035			0.880442		0.772809		0.613245		0.731013		0.49128
	0.0351			0.880661		0.77315		0.613786		0.731378		0.491856
	0.0352			0.88088		0.773488		0.614327		0.731742		0.492429
	0.0353			0.881099		0.773827		0.614861		0.7321		0.493006
	0.0354			0.881315		0.774162		0.615392		0.732464		0.493584
	0.0355			0.881529		0.774496		0.615911		0.732826		0.494159
	0.0356			0.881742		0.774828		0.616429		0.733187		0.494734
	0.0357			0.881955		0.775159		0.616947		0.733549		0.495306
	0.0358			0.882166		0.775489		0.617449		0.73391		0.49588
	0.0359			0.882375		0.775818		0.617959		0.73427		0.49645
	0.036			0.882585		0.776148		0.618457		0.734623		0.49701
	0.0361			0.882792		0.776476		0.618947		0.734983		0.497569
	0.0362			0.882997		0.776801		0.619433		0.735337		0.498128
	0.0363			0.883203		0.777127		0.619923		0.735692		0.49868
	0.0364			0.883407		0.777452		0.620397		0.736045		0.499232
	0.0365			0.883608		0.777772		0.620876		0.736398		0.499787
	0.0366			0.88381		0.778092		0.621355		0.736746		0.500341
	0.0367			0.884009		0.778412		0.621836		0.737098		0.500888
	0.0368			0.884207		0.778733		0.622309		0.737446		0.501433
	0.0369			0.884406		0.77905		0.622783		0.737787		0.501977
	0.037			0.884604		0.779365		0.623234		0.73813		0.502517
	0.0371			0.8848		0.779681		0.623701		0.738477		0.503055
	0.0372			0.884994		0.779996		0.624164		0.738819		0.503598
	0.0373			0.885188		0.780309		0.624632		0.739158		0.504142
	0.0374			0.885379		0.780624		0.625103		0.739495		0.504683
	0.0375			0.885572		0.780939		0.625575		0.739828		0.505227
	0.0376			0.885764		0.781254		0.626051		0.740161		0.505766
	0.0377			0.885953		0.781567		0.626519		0.740496		0.506305
	0.0378			0.886142		0.781876		0.626994		0.740825		0.506843
	0.0379			0.886331		0.782186		0.62747		0.741151		0.507374
	0.038			0.886516		0.782496		0.627954		0.741475		0.507912
	0.0381			0.8867		0.782803		0.628439		0.741795		0.508446
	0.0382			0.886884		0.783108		0.628913		0.742115		0.508978
	0.0383			0.887068		0.783408		0.629394		0.742438		0.509512
	0.0384			0.887252		0.783709		0.629873		0.74276		0.510051
	0.0385			0.887433		0.784011		0.630344		0.743075		0.510593
	0.0386			0.887613		0.784316		0.63081		0.743387		0.511138
	0.0387			0.887794		0.784617		0.631264		0.743697		0.511673
	0.0388			0.887975		0.784916		0.631719		0.744009		0.512205
	0.0389			0.888152		0.785213		0.632186		0.74432		0.512736
	0.039			0.888329		0.785508		0.632648		0.744632		0.513275
	0.0391			0.888505		0.785805		0.633107		0.74494		0.513812
	0.0392			0.888679		0.786101		0.633567		0.745249		0.514341
	0.0393			0.888853		0.786394		0.634037		0.745555		0.514867
	0.0394			0.889029		0.786685		0.634505		0.745861		0.515395
	0.0395			0.889203		0.786975		0.634977		0.746165		0.515921
	0.0396			0.889374		0.787265		0.635448		0.746466		0.516449
	0.0397			0.889544		0.787552		0.635906		0.746772		0.516978
	0.0398			0.889715		0.787835		0.636371		0.747073		0.517515
	0.0399			0.889884		0.788118		0.636849		0.747378		0.518043
	0.04			0.890053		0.788402		0.637325		0.747683		0.518568
	0.0401			0.890223		0.788684		0.637794		0.747983		0.519098
	0.0402			0.890391		0.788965		0.638264		0.748282		0.519627
	0.0403			0.890557		0.789243		0.638738		0.748585		0.52015
	0.0404			0.890723		0.78952		0.639198		0.748881		0.520676
	0.0405			0.890888		0.789795		0.639669		0.749174		0.521199
	0.0406			0.89105		0.790068		0.640138		0.749464		0.521719
	0.0407			0.891211		0.790342		0.640603		0.749764		0.522239
	0.0408			0.891373		0.790614		0.641078		0.750053		0.52276
	0.0409			0.891535		0.790888		0.641544		0.750339		0.523279
	0.041			0.891694		0.791159		0.642014		0.750626		0.523794
	0.0411			0.891853		0.791427		0.642491		0.75091		0.524308
	0.0412			0.892011		0.791695		0.642961		0.751192		0.524817
	0.0413			0.892167		0.791962		0.643425		0.751484		0.525325
	0.0414			0.892325		0.792229		0.643903		0.751771		0.525835
	0.0415			0.892482		0.792493		0.644388		0.752052		0.526348
	0.0416			0.892637		0.792758		0.644854		0.752338		0.52686
	0.0417			0.892793		0.793016		0.645322		0.752622		0.527368
	0.0418			0.892948		0.793277		0.645784		0.752907		0.527882
	0.0419			0.893103		0.793539		0.646244		0.753192		0.528394
	0.042			0.893257		0.7938		0.646707		0.753478		0.528899
	0.0421			0.893409		0.794058		0.647161		0.753763		0.529403
	0.0422			0.893561		0.794318		0.647611		0.75405		0.529909
	0.0423			0.893712		0.794576		0.648059		0.754338		0.530408
	0.0424			0.893863		0.794836		0.64851		0.754628		0.530906
	0.0425			0.894014		0.79509		0.648944		0.754916		0.531405
	0.0426			0.894165		0.795345		0.649381		0.755204		0.531909
	0.0427			0.894316		0.7956		0.649821		0.755494		0.532404
	0.0428			0.894464		0.795855		0.650253		0.755777		0.532893
	0.0429			0.894612		0.796107		0.650697		0.756056		0.533387
	0.043			0.894759		0.796356		0.651133		0.756337		0.533879
	0.0431			0.894905		0.796604		0.651567		0.756615		0.534367
	0.0432			0.895051		0.79685		0.652011		0.75689		0.534861
	0.0433			0.895196		0.797096		0.652437		0.757168		0.535349
	0.0434			0.895341		0.797342		0.65286		0.757449		0.535836
	0.0435			0.895486		0.797586		0.653291		0.757728		0.53632
	0.0436			0.895631		0.79783		0.653729		0.758005		0.536807
	0.0437			0.895774		0.798073		0.654154		0.758282		0.537283
	0.0438			0.895917		0.79831		0.654584		0.758557		0.537757
	0.0439			0.896061		0.798546		0.655017		0.758831		0.538236
	0.044			0.896204		0.798785		0.655441		0.759101		0.538708
	0.0441			0.896345		0.799023		0.655856		0.759375		0.539176
	0.0442			0.896488		0.799259		0.656285		0.759647		0.539643
	0.0443			0.896629		0.799496		0.656699		0.759921		0.540114
	0.0444			0.89677		0.799731		0.657102		0.76019		0.540578
	0.0445			0.896911		0.799966		0.657509		0.760463		0.541037
	0.0446			0.897049		0.800202		0.657921		0.760738		0.5415
	0.0447			0.897187		0.800438		0.658348		0.761015		0.54196
	0.0448			0.897326		0.800672		0.658762		0.761285		0.542421
	0.0449			0.897465		0.800906		0.659173		0.761559		0.542883
	0.045			0.897601		0.801141		0.659577		0.761828		0.543345
	0.0451			0.897738		0.801376		0.659991		0.762097		0.543802
	0.0452			0.897873		0.80161		0.660409		0.762366		0.544252
	0.0453			0.898008		0.801844		0.660822		0.762636		0.544702
	0.0454			0.898141		0.802079		0.661241		0.762903		0.545148
	0.0455			0.898275		0.80231		0.661657		0.763163		0.545597
	0.0456			0.898408		0.802535		0.662071		0.763423		0.546045
	0.0457			0.898541		0.802764		0.662478		0.763676		0.546494
	0.0458			0.898673		0.802994		0.662879		0.763933		0.546945
	0.0459			0.898805		0.803222		0.663295		0.764192		0.547387
	0.046			0.898936		0.803449		0.66371		0.764445		0.547825
	0.0461			0.899067		0.803676		0.664126		0.764697		0.548269
	0.0462			0.899199		0.803903		0.664542		0.764953		0.548715
	0.0463			0.899331		0.804129		0.664964		0.765207		0.549155
	0.0464			0.899461		0.804358		0.665387		0.765456		0.549595
	0.0465			0.89959		0.804588		0.665806		0.765707		0.550035
	0.0466			0.899721		0.804814		0.666212		0.765959		0.550476
	0.0467			0.899852		0.80504		0.666633		0.766207		0.550911
	0.0468			0.899981		0.805267		0.66704		0.766457		0.55135
	0.0469			0.900109		0.805493		0.667441		0.766706		0.551785
	0.047			0.900237		0.805718		0.667844		0.766952		0.552225
	0.0471			0.900365		0.805943		0.668245		0.767198		0.552669
	0.0472			0.900494		0.806167		0.66865		0.767451		0.553108
	0.0473			0.900622		0.806388		0.669046		0.767703		0.553548
	0.0474			0.900748		0.806607		0.669439		0.767952		0.553979
	0.0475			0.900874		0.806825		0.669827		0.768204		0.554411
	0.0476			0.901		0.807042		0.670222		0.768456		0.554839
	0.0477			0.901124		0.807261		0.67062		0.768712		0.555275
	0.0478			0.901248		0.807476		0.671005		0.768968		0.555711
	0.0479			0.901371		0.807693		0.671382		0.769222		0.556143
	0.048			0.901493		0.807909		0.67175		0.769475		0.556579
	0.0481			0.901615		0.808126		0.67212		0.769726		0.55701
	0.0482			0.901737		0.80834		0.672505		0.769973		0.557435
	0.0483			0.901859		0.808555		0.672874		0.770225		0.557863
	0.0484			0.901981		0.808771		0.673239		0.770478		0.558294
	0.0485			0.902103		0.808986		0.673611		0.770725		0.558723
	0.0486			0.902224		0.809203		0.673985		0.77097		0.559149
	0.0487			0.902344		0.80942		0.674353		0.771219		0.55957
	0.0488			0.902463		0.809637		0.674712		0.771463		0.559989
	0.0489			0.902581		0.809854		0.675069		0.771707		0.560408
	0.049			0.902698		0.810075		0.675437		0.771954		0.560827
	0.0491			0.902816		0.810294		0.675793		0.772196		0.561241
	0.0492			0.902933		0.810514		0.676146		0.772435		0.561662
	0.0493			0.903049		0.810732		0.676499		0.772678		0.562086
	0.0494			0.903166		0.810945		0.676853		0.772918		0.562504
	0.0495			0.903283		0.811158		0.677197		0.773156		0.562926
	0.0496			0.9034		0.811373		0.677545		0.77339		0.563349
	0.0497			0.903517		0.811591		0.677907		0.773627		0.563771
	0.0498			0.903635		0.81181		0.678255		0.773858		0.564197
	0.0499			0.903752		0.812026		0.6786		0.774096		0.564616
	0.05			0.903869		0.812241		0.678955		0.774331		0.565036
	0.0501			0.903984		0.812455		0.679308		0.774562		0.565454
	0.0502			0.904098		0.81267		0.679661		0.774792		0.565872
	0.0503			0.904212		0.812885		0.680009		0.775022		0.566287
	0.0504			0.904325		0.813098		0.680343		0.775248		0.566702
	0.0505			0.90444		0.81331		0.680686		0.775478		0.567111
	0.0506			0.904554		0.81352		0.681036		0.775703		0.567527
	0.0507			0.904666		0.813732		0.681395		0.775925		0.567945
	0.0508			0.904779		0.813942		0.681748		0.776152		0.568358
	0.0509			0.904891		0.814153		0.682099		0.776385		0.568769
	0.051			0.905001		0.814363		0.682454		0.776611		0.569177
	0.0511			0.905111		0.814574		0.682806		0.776831		0.569586
	0.0512			0.905222		0.814779		0.683146		0.777053		0.569997
	0.0513			0.905331		0.814981		0.683488		0.777275		0.57041
	0.0514			0.90544		0.815183		0.683837		0.777496		0.570817
	0.0515			0.90555		0.815386		0.684189		0.777713		0.571226
	0.0516			0.905659		0.81559		0.684539		0.777932		0.571631
	0.0517			0.905767		0.815791		0.684892		0.778152		0.572029
	0.0518			0.905876		0.815992		0.685238		0.778365		0.572432
	0.0519			0.905984		0.816196		0.685583		0.778577		0.572839
	0.052			0.906093		0.816398		0.685942		0.778791		0.573248
	0.0521			0.906199		0.816598		0.686298		0.778998		0.573643
	0.0522			0.906305		0.816799		0.686642		0.77921		0.574038
	0.0523			0.90641		0.817002		0.686989		0.779421		0.574439
	0.0524			0.906515		0.817205		0.687331		0.779636		0.574837
	0.0525			0.906622		0.817408		0.687672		0.77985		0.575236
	0.0526			0.906729		0.817609		0.688004		0.780065		0.575636
	0.0527			0.906833		0.81781		0.688333		0.780282		0.576033
	0.0528			0.906937		0.818013		0.688652		0.780491		0.576435
	0.0529			0.907042		0.818217		0.68898		0.780699		0.576835
	0.053			0.907145		0.818417		0.689304		0.780909		0.577238
	0.0531			0.907249		0.818615		0.689629		0.781119		0.577641
	0.0532			0.907353		0.818814		0.689956		0.781335		0.578043
	0.0533			0.907455		0.81901		0.690282		0.781547		0.578449
	0.0534			0.907558		0.819208		0.69061		0.781753		0.578852
	0.0535			0.907659		0.819403		0.690946		0.78196		0.579259
	0.0536			0.907762		0.819594		0.691297		0.782173		0.579661
	0.0537			0.907864		0.819785		0.691638		0.78238		0.580063
	0.0538			0.907966		0.819978		0.691976		0.782589		0.580467
	0.0539			0.908068		0.82017		0.69232		0.782796		0.580868
	0.054			0.908169		0.820362		0.692665		0.783003		0.581266
	0.0541			0.908269		0.820556		0.693005		0.78321		0.581661
	0.0542			0.908371		0.820749		0.693351		0.783415		0.582057
	0.0543			0.908472		0.820937		0.693685		0.783623		0.582453
	0.0544			0.908571		0.821125		0.694031		0.783827		0.582849
	0.0545			0.908671		0.821313		0.694374		0.78403		0.583248
	0.0546			0.908771		0.821499		0.694723		0.784238		0.583647
	0.0547			0.908871		0.821683		0.695062		0.784445		0.584042
	0.0548			0.908972		0.821869		0.695399		0.78465		0.584432
	0.0549			0.909072		0.822056		0.69574		0.78486		0.584817
	0.055			0.90917		0.82224		0.69608		0.785077		0.585207
	0.0551			0.909268		0.822419		0.69641		0.78529		0.585593
	0.0552			0.909367		0.8226		0.69674		0.7855		0.585979
	0.0553			0.909466		0.822782		0.697073		0.785704		0.586362
	0.0554			0.909562		0.822963		0.697401		0.785907		0.586744
	0.0555			0.909658		0.823141		0.697731		0.78611		0.587115
	0.0556			0.909754		0.823322		0.698053		0.786313		0.587484
	0.0557			0.909853		0.823503		0.698379		0.786514		0.587857
	0.0558			0.90995		0.823684		0.698708		0.786714		0.588227
	0.0559			0.910045		0.823865		0.699027		0.786912		0.588592
	0.056			0.910142		0.824043		0.699343		0.787108		0.588966
	0.0561			0.910237		0.824222		0.699656		0.787305		0.589338
	0.0562			0.910333		0.8244		0.699972		0.7875		0.589707
	0.0563			0.910429		0.824577		0.700293		0.787692		0.590082
	0.0564			0.910524		0.824754		0.700605		0.787889		0.590463
	0.0565			0.910619		0.824931		0.700915		0.788089		0.590838
	0.0566			0.910715		0.825105		0.701225		0.78829		0.59121
	0.0567			0.910809		0.825278		0.70153		0.788489		0.591581
	0.0568			0.910901		0.825451		0.701836		0.788688		0.591952
	0.0569			0.910995		0.825624		0.702162		0.788883		0.592324
	0.057			0.91109		0.825797		0.702489		0.78908		0.592692
	0.0571			0.911184		0.825967		0.702811		0.78928		0.593056
	0.0572			0.911278		0.826136		0.70314		0.789477		0.593421
	0.0573			0.911374		0.826305		0.703461		0.789674		0.593786
	0.0574			0.911468		0.826476		0.703781		0.789872		0.594144
	0.0575			0.91156		0.826649		0.704104		0.790072		0.594504
	0.0576			0.911653		0.826818		0.704418		0.790272		0.594867
	0.0577			0.911747		0.826988		0.704739		0.790466		0.595224
	0.0578			0.911838		0.827155		0.705054		0.790657		0.595577
	0.0579			0.91193		0.827324		0.705371		0.790848		0.595932
	0.058			0.912021		0.827491		0.705685		0.79105		0.596285
	0.0581			0.912114		0.827658		0.706004		0.79125		0.596638
	0.0582			0.912206		0.827825		0.706313		0.791444		0.596993
	0.0583			0.912297		0.827992		0.70663		0.79164		0.597345
	0.0584			0.912389		0.82816		0.706936		0.791837		0.597697
	0.0585			0.91248		0.828323		0.707246		0.792039		0.598048
	0.0586			0.912572		0.828488		0.707554		0.792237		0.598399
	0.0587			0.912665		0.828652		0.707856		0.792433		0.598756
	0.0588			0.912756		0.828817		0.708162		0.792636		0.599113
	0.0589			0.912847		0.828984		0.708465		0.792837		0.599468
	0.059			0.912938		0.829149		0.708762		0.793037		0.599818
	0.0591			0.913028		0.829315		0.709069		0.793233		0.600166
	0.0592			0.913118		0.82948		0.709378		0.793433		0.600515
	0.0593			0.913207		0.829644		0.709681		0.793634		0.600863
	0.0594			0.913296		0.829806		0.709984		0.793829		0.601212
	0.0595			0.913386		0.829971		0.710292		0.794018		0.601561
	0.0596			0.913474		0.830134		0.710597		0.794208		0.601905
	0.0597			0.913561		0.830295		0.710909		0.7944		0.602256
	0.0598			0.913648		0.830459		0.711218		0.794592		0.602604
	0.0599			0.913736		0.83062		0.711522		0.794783		0.602954
	0.06			0.913821		0.830784		0.711817		0.794971		0.603305
	0.0601			0.913907		0.830948		0.712127		0.795164		0.603652
	0.0602			0.913995		0.831112		0.712426		0.795353		0.603999
	0.0603			0.914083		0.831275		0.712734		0.79554		0.604347
	0.0604			0.914169		0.831439		0.713041		0.79573		0.604693
	0.0605			0.914255		0.831605		0.713345		0.795917		0.60504
	0.0606			0.914341		0.831767		0.713654		0.79611		0.605387
	0.0607			0.914427		0.831928		0.713952		0.796305		0.605729
	0.0608			0.914512		0.83209		0.714245		0.796496		0.606074
	0.0609			0.914597		0.832256		0.714545		0.796683		0.606417
	0.061			0.91468		0.832419		0.714842		0.796868		0.606766
	0.0611			0.914765		0.832582		0.715131		0.797052		0.607112
	0.0612			0.914849		0.832744		0.715424		0.797241		0.607455
	0.0613			0.914934		0.8329		0.715711		0.797434		0.607803
	0.0614			0.915019		0.833059		0.715994		0.797624		0.608148
	0.0615			0.915103		0.833222		0.716279		0.797813		0.60849
	0.0616			0.915187		0.833383		0.716568		0.798005		0.608825
	0.0617			0.91527		0.833544		0.716853		0.798196		0.609166
	0.0618			0.915352		0.833706		0.717131		0.798384		0.609508
	0.0619			0.915435		0.833869		0.717412		0.798574		0.609845
	0.062			0.915517		0.834032		0.717692		0.798769		0.61018
	0.0621			0.915599		0.834194		0.71797		0.798965		0.610512
	0.0622			0.915682		0.834358		0.71825		0.799159		0.610846
	0.0623			0.915764		0.83452		0.718526		0.79935		0.611185
	0.0624			0.915846		0.83468		0.718808		0.799542		0.611522
	0.0625			0.915931		0.83484		0.719089		0.799732		0.611857
	0.0626			0.916013		0.835001		0.719363		0.79992		0.612197
	0.0627			0.916094		0.835159		0.719642		0.800106		0.612536
	0.0628			0.916177		0.835318		0.71992		0.800292		0.612878
	0.0629			0.916259		0.835477		0.720208		0.800477		0.613219
	0.063			0.91634		0.835633		0.720491		0.800662		0.613562
	0.0631			0.91642		0.835793		0.720767		0.800852		0.613903
	0.0632			0.9165		0.83595		0.721048		0.801043		0.614244
	0.0633			0.916582		0.836106		0.721331		0.801229		0.614591
	0.0634			0.916663		0.836264		0.721618		0.801414		0.614935
	0.0635			0.916743		0.836424		0.72191		0.801596		0.615272
	0.0636			0.916823		0.83658		0.722198		0.801776		0.615608
	0.0637			0.916903		0.836738		0.722471		0.801956		0.615946
	0.0638			0.916982		0.836894		0.722736		0.802138		0.61628
	0.0639			0.917062		0.837047		0.723009		0.802318		0.616616
	0.064			0.917142		0.837202		0.723281		0.802498		0.616951
	0.0641			0.917222		0.837359		0.723557		0.802679		0.617286
	0.0642			0.917301		0.837516		0.723837		0.802856		0.617621
	0.0643			0.917381		0.837675		0.724117		0.803032		0.617956
	0.0644			0.917462		0.83783		0.724399		0.803209		0.61829
	0.0645			0.917542		0.837984		0.724685		0.803387		0.618619
	0.0646			0.917621		0.838137		0.724971		0.803562		0.618944
	0.0647			0.9177		0.838292		0.725259		0.803742		0.619277
	0.0648			0.917779		0.838444		0.725541		0.803925		0.619613
	0.0649			0.917861		0.838594		0.725822		0.8041		0.619941
	0.065			0.91794		0.838744		0.726112		0.804275		0.620269
	0.0651			0.918018		0.838894		0.726409		0.804451		0.620603
	0.0652			0.918098		0.839045		0.726711		0.804622		0.620934
	0.0653			0.918176		0.839197		0.727012		0.804795		0.621262
	0.0654			0.918253		0.83935		0.727307		0.804975		0.62159
	0.0655			0.918332		0.839503		0.727603		0.805153		0.621918
	0.0656			0.918411		0.839655		0.727913		0.805326		0.622246
	0.0657			0.918488		0.83981		0.728216		0.805501		0.622565
	0.0658			0.918566		0.839962		0.728511		0.805671		0.622886
	0.0659			0.918645		0.840114		0.728803		0.805844		0.623204
	0.066			0.918722		0.840263		0.729094		0.806024		0.623522
	0.0661			0.918799		0.840413		0.729376		0.806205		0.623845
	0.0662			0.918876		0.840567		0.729673		0.806382		0.624168
	0.0663			0.918953		0.840721		0.729971		0.80656		0.62449
	0.0664			0.919029		0.840875		0.730266		0.806736		0.62481
	0.0665			0.919105		0.841026		0.730552		0.806914		0.625131
	0.0666			0.919181		0.841176		0.730833		0.807089		0.625452
	0.0667			0.919258		0.84133		0.731119		0.807259		0.625766
	0.0668			0.919335		0.841477		0.731401		0.807433		0.626078
	0.0669			0.919409		0.841622		0.731683		0.807609		0.626398
	0.067			0.919484		0.84177		0.731967		0.807783		0.626715
	0.0671			0.91956		0.841922		0.732247		0.807949		0.62703
	0.0672			0.919633		0.842074		0.732523		0.808114		0.62735
	0.0673			0.919708		0.842224		0.732792		0.808286		0.627665
	0.0674			0.919783		0.842372		0.733072		0.808459		0.627981
	0.0675			0.919858		0.842518		0.733355		0.808624		0.628301
	0.0676			0.919933		0.842665		0.733627		0.808788		0.628613
	0.0677			0.920007		0.842813		0.733895		0.808952		0.628924
	0.0678			0.920083		0.842961		0.734168		0.809117		0.629234
	0.0679			0.920157		0.843109		0.734434		0.809278		0.629551
	0.068			0.920233		0.843254		0.734696		0.80944		0.629867
	0.0681			0.920308		0.843397		0.734954		0.809599		0.630183
	0.0682			0.920382		0.843542		0.735217		0.809763		0.630503
	0.0683			0.920456		0.843687		0.73547		0.809928		0.630826
	0.0684			0.920529		0.84383		0.735727		0.810088		0.63115
	0.0685			0.920602		0.843972		0.735982		0.810249		0.631469
	0.0686			0.920675		0.84411		0.736248		0.810415		0.631792
	0.0687			0.920749		0.844252		0.736505		0.810581		0.63211
	0.0688			0.920821		0.844393		0.73676		0.810748		0.632429
	0.0689			0.920893		0.844531		0.737014		0.810912		0.632748
	0.069			0.920965		0.844672		0.737272		0.811075		0.633068
	0.0691			0.921038		0.844813		0.737537		0.811236		0.633388
	0.0692			0.921109		0.844955		0.737803		0.8114		0.633708
	0.0693			0.921181		0.845097		0.738068		0.811569		0.634023
	0.0694			0.921253		0.845235		0.738337		0.811731		0.634339
	0.0695			0.921325		0.845373		0.738621		0.811896		0.634651
	0.0696			0.921395		0.845515		0.738896		0.812066		0.634971
	0.0697			0.921465		0.845655		0.739174		0.81223		0.635291
	0.0698			0.921535		0.845793		0.739435		0.812394		0.63561
	0.0699			0.921606		0.845932		0.739683		0.812565		0.635929
	0.07			0.921678		0.846072		0.739944		0.812733		0.636244
	0.0701			0.921749		0.846215		0.740202		0.812899		0.636562
	0.0702			0.921819		0.846357		0.740449		0.813066		0.636886
	0.0703			0.921889		0.846499		0.7407		0.813235		0.637209
	0.0704			0.921957		0.846641		0.740942		0.813405		0.63753
	0.0705			0.922028		0.846784		0.741192		0.813577		0.637853
	0.0706			0.922099		0.846927		0.741436		0.813741		0.638175
	0.0707			0.92217		0.84707		0.741675		0.813903		0.638497
	0.0708			0.92224		0.847209		0.741922		0.814068		0.638822
	0.0709			0.92231		0.847351		0.742182		0.814235		0.639143
	0.071			0.92238		0.847492		0.742434		0.814398		0.63947
	0.0711			0.922451		0.847629		0.742681		0.814558		0.639798
	0.0712			0.922521		0.847764		0.742929		0.814719		0.640119
	0.0713			0.92259		0.8479		0.743178		0.814879		0.640439
	0.0714			0.92266		0.848038		0.743422		0.815041		0.640759
	0.0715			0.922729		0.848173		0.743671		0.815203		0.641083
	0.0716			0.9228		0.848306		0.743929		0.815356		0.641399
	0.0717			0.922871		0.84844		0.744182		0.815511		0.641714
	0.0718			0.92294		0.848574		0.744424		0.815668		0.64203
	0.0719			0.923008		0.848708		0.744663		0.815827		0.642347
	0.072			0.923076		0.848842		0.744889		0.815992		0.64267
	0.0721			0.923145		0.84898		0.745112		0.816152		0.642986
	0.0722			0.923214		0.849116		0.745341		0.816305		0.6433
	0.0723			0.923282		0.849249		0.745575		0.816463		0.643619
	0.0724			0.92335		0.849384		0.745809		0.816618		0.643937
	0.0725			0.92342		0.849519		0.746043		0.816769		0.644253
	0.0726			0.923488		0.849653		0.74627		0.816921		0.644565
	0.0727			0.923558		0.849788		0.746503		0.81707		0.644876
	0.0728			0.923626		0.849922		0.746741		0.817217		0.645185
	0.0729			0.923695		0.850057		0.746982		0.817362		0.645498
	0.073			0.923765		0.850193		0.747224		0.81751		0.645812
	0.0731			0.923835		0.850329		0.747452		0.817659		0.646128
	0.0732			0.923902		0.850462		0.747689		0.817809		0.646444
	0.0733			0.923969		0.850596		0.747916		0.817959		0.64676
	0.0734			0.924037		0.850732		0.748145		0.818107		0.64708
	0.0735			0.924107		0.85087		0.748376		0.818258		0.647403
	0.0736			0.924177		0.851005		0.748606		0.818408		0.647722
	0.0737			0.924247		0.851137		0.748822		0.818553		0.648038
	0.0738			0.924315		0.851267		0.749035		0.818699		0.648354
	0.0739			0.924384		0.8514		0.749266		0.81885		0.648667
	0.074			0.924454		0.851535		0.749505		0.819005		0.648978
	0.0741			0.924523		0.851667		0.749735		0.819159		0.64929
	0.0742			0.924592		0.851797		0.749963		0.819307		0.649605
	0.0743			0.92466		0.851929		0.750196		0.819454		0.649918
	0.0744			0.924727		0.852061		0.750431		0.8196		0.650232
	0.0745			0.924795		0.852197		0.750661		0.81974		0.650551
	0.0746			0.924864		0.852334		0.750891		0.819884		0.650866
	0.0747			0.924932		0.852469		0.751112		0.820026		0.651176
	0.0748			0.924997		0.852603		0.751329		0.820165		0.651486
	0.0749			0.925063		0.852734		0.751549		0.820305		0.6518
	0.075			0.925129		0.852867		0.751769		0.820449		0.652111
	0.0751			0.925194		0.853002		0.751991		0.820591		0.652421
	0.0752			0.925259		0.853137		0.752195		0.820738		0.652726
	0.0753			0.925326		0.85327		0.752398		0.820881		0.653027
	0.0754			0.925393		0.853402		0.752614		0.821025		0.653332
	0.0755			0.925458		0.853534		0.75282		0.821173		0.653637
	0.0756			0.925523		0.853665		0.753023		0.82132		0.653944
	0.0757			0.925588		0.853797		0.753233		0.821467		0.654246
	0.0758			0.925652		0.853929		0.753437		0.821611		0.654549
	0.0759			0.925717		0.854062		0.753649		0.821762		0.654848
	0.076			0.925782		0.85419		0.75386		0.821902		0.655147
	0.0761			0.925847		0.85432		0.754084		0.82204		0.655444
	0.0762			0.925911		0.854449		0.754313		0.822184		0.655738
	0.0763			0.925975		0.854578		0.754532		0.822328		0.656035
	0.0764			0.926038		0.854708		0.754751		0.822468		0.656332
	0.0765			0.926101		0.854835		0.754965		0.822611		0.656625
	0.0766			0.926165		0.854962		0.755174		0.82276		0.656922
	0.0767			0.926229		0.855089		0.75539		0.8229		0.657213
	0.0768			0.926293		0.855216		0.755606		0.823035		0.657504
	0.0769			0.926355		0.855339		0.755824		0.823173		0.657799
	0.077			0.926418		0.855461		0.756034		0.823308		0.65809
	0.0771			0.926482		0.855587		0.756245		0.823444		0.658385
	0.0772			0.926545		0.855711		0.756463		0.823584		0.658668
	0.0773			0.926606		0.855833		0.756687		0.823728		0.658954
	0.0774			0.926668		0.855954		0.756912		0.823877		0.659243
	0.0775			0.926733		0.856075		0.757135		0.824022		0.659535
	0.0776			0.926796		0.856197		0.757351		0.824168		0.659825
	0.0777			0.926858		0.856319		0.757565		0.824314		0.660108
	0.0778			0.926922		0.856438		0.757786		0.824461		0.660393
	0.0779			0.926985		0.856557		0.758001		0.824608		0.660674
	0.078			0.927049		0.856675		0.758199		0.824755		0.660958
	0.0781			0.927112		0.856791		0.758397		0.824901		0.661245
	0.0782			0.927174		0.856908		0.758599		0.825053		0.661532
	0.0783			0.927236		0.857028		0.758795		0.825199		0.661819
	0.0784			0.927299		0.857148		0.758989		0.825348		0.66211
	0.0785			0.927362		0.857266		0.759191		0.825491		0.6624
	0.0786			0.927425		0.857385		0.75939		0.825627		0.662682
	0.0787			0.927486		0.857505		0.759587		0.825768		0.662964
	0.0788			0.927548		0.857625		0.759786		0.825915		0.663241
	0.0789			0.927611		0.857743		0.759992		0.826061		0.663517
	0.079			0.927673		0.85786		0.760201		0.826207		0.663794
	0.0791			0.927737		0.857978		0.760403		0.826353		0.664071
	0.0792			0.9278		0.858097		0.760607		0.826498		0.664343
	0.0793			0.927862		0.858216		0.760813		0.826641		0.664611
	0.0794			0.927924		0.858336		0.761022		0.826785		0.66488
	0.0795			0.927985		0.858453		0.761217		0.826928		0.665148
	0.0796			0.928046		0.85857		0.761411		0.82707		0.66542
	0.0797			0.928107		0.858687		0.761605		0.827209		0.665692
	0.0798			0.928167		0.858803		0.761796		0.827351		0.665971
	0.0799			0.928227		0.858921		0.761995		0.827491		0.666254
	0.08			0.928288		0.859041		0.762185		0.827627		0.666529
	0.0801			0.928349		0.859159		0.762384		0.827764		0.6668
	0.0802			0.928409		0.859275		0.762578		0.827901		0.667079
	0.0803			0.928469		0.859392		0.762772		0.828037		0.667357
	0.0804			0.928529		0.859508		0.762961		0.828176		0.667637
	0.0805			0.92859		0.859625		0.763162		0.828311		0.667919
	0.0806			0.928651		0.859742		0.76336		0.828447		0.668196
	0.0807			0.928713		0.859861		0.763563		0.828583		0.668472
	0.0808			0.928772		0.859978		0.763766		0.828715		0.668749
	0.0809			0.928832		0.860094		0.763965		0.828844		0.669018
	0.081			0.928892		0.860209		0.764167		0.828978		0.669293
	0.0811			0.928951		0.860326		0.764372		0.829117		0.66957
	0.0812			0.929011		0.860441		0.764577		0.829253		0.669844
	0.0813			0.92907		0.860557		0.764786		0.82939		0.670115
	0.0814			0.929127		0.860671		0.764977		0.829532		0.670391
	0.0815			0.929185		0.860788		0.765177		0.829677		0.67066
	0.0816			0.929243		0.860906		0.765379		0.829819		0.670928
	0.0817			0.929302		0.861023		0.765577		0.829957		0.671202
	0.0818			0.929359		0.86114		0.765784		0.830104		0.671475
	0.0819			0.929416		0.861255		0.765985		0.830244		0.671748
	0.082			0.929474		0.861369		0.766185		0.830382		0.672017
	0.0821			0.929531		0.861486		0.766386		0.830523		0.672284
	0.0822			0.929589		0.861604		0.766585		0.830661		0.672549
	0.0823			0.929646		0.861723		0.766785		0.8308		0.67282
	0.0824			0.929703		0.86184		0.766981		0.830934		0.673095
	0.0825			0.929761		0.861954		0.76717		0.831066		0.673365
	0.0826			0.929818		0.862071		0.767358		0.831196		0.673629
	0.0827			0.929875		0.86219		0.767553		0.83133		0.673895
	0.0828			0.929932		0.862308		0.767753		0.831463		0.674162
	0.0829			0.929986		0.862421		0.76795		0.831601		0.674432
	0.083			0.930042		0.862533		0.768138		0.83174		0.674704
	0.0831			0.930099		0.862647		0.768331		0.831882		0.674969
	0.0832			0.930156		0.862762		0.768511		0.832023		0.675234
	0.0833			0.930213		0.862872		0.768695		0.832166		0.675503
	0.0834			0.930269		0.862983		0.768876		0.832307		0.675773
	0.0835			0.930326		0.863096		0.769052		0.832444		0.676042
	0.0836			0.930382		0.86321		0.769229		0.832584		0.676308
	0.0837			0.93044		0.863326		0.769398		0.832725		0.676571
	0.0838			0.930496		0.863437		0.769579		0.832863		0.676839
	0.0839			0.930553		0.86355		0.769763		0.833001		0.677107
	0.084			0.93061		0.863664		0.769942		0.833142		0.677373
	0.0841			0.930666		0.863775		0.770115		0.833282		0.677642
	0.0842			0.930723		0.86389		0.770285		0.833417		0.677909
	0.0843			0.930779		0.864006		0.770455		0.833548		0.678175
	0.0844			0.930837		0.86412		0.770624		0.833683		0.67844
	0.0845			0.930893		0.864233		0.77079		0.833818		0.678704
	0.0846			0.930948		0.864349		0.770957		0.833955		0.678969
	0.0847			0.931005		0.864463		0.771121		0.834091		0.679229
	0.0848			0.931063		0.864574		0.771293		0.834226		0.679492
	0.0849			0.931119		0.864686		0.771475		0.834364		0.679751
	0.085			0.931175		0.8648		0.771652		0.8345		0.680011
	0.0851			0.931231		0.864916		0.771833		0.834634		0.680269
	0.0852			0.931285		0.865029		0.772017		0.834768		0.680526
	0.0853			0.931341		0.865143		0.772197		0.834903		0.68078
	0.0854			0.931398		0.865255		0.772375		0.835033		0.68104
	0.0855			0.931453		0.865368		0.77256		0.835164		0.681298
	0.0856			0.931507		0.865477		0.772736		0.835291		0.681559
	0.0857			0.931565		0.865588		0.772904		0.835424		0.681817
	0.0858			0.931621		0.865699		0.773084		0.835555		0.682072
	0.0859			0.931677		0.86581		0.773263		0.835688		0.682323
	0.086			0.931734		0.865918		0.773438		0.835816		0.682582
	0.0861			0.931791		0.866027		0.773613		0.835947		0.682844
	0.0862			0.931847		0.866138		0.773772		0.836076		0.683105
	0.0863			0.931901		0.866248		0.773943		0.836205		0.683362
	0.0864			0.931956		0.866355		0.774115		0.836337		0.683618
	0.0865			0.932011		0.866462		0.774295		0.836464		0.683873
	0.0866			0.932067		0.866568		0.774463		0.83659		0.684124
	0.0867			0.932123		0.866676		0.77463		0.836721		0.684373
	0.0868			0.93218		0.866783		0.774799		0.836854		0.684631
	0.0869			0.932237		0.866891		0.774968		0.836984		0.68489
	0.087			0.932292		0.866997		0.775132		0.837117		0.685145
	0.0871			0.932347		0.867105		0.775294		0.837252		0.685398
	0.0872			0.932403		0.867213		0.775455		0.837386		0.685649
	0.0873			0.93246		0.867318		0.775621		0.837517		0.685895
	0.0874			0.932516		0.867424		0.775779		0.837651		0.686149
	0.0875			0.932571		0.86753		0.775949		0.837783		0.6864
	0.0876			0.932626		0.867638		0.77612		0.837915		0.686649
	0.0877			0.932679		0.867746		0.77629		0.838047		0.686894
	0.0878			0.932733		0.867853		0.776466		0.838179		0.68714
	0.0879			0.932787		0.867959		0.776644		0.838309		0.687391
	0.088			0.932843		0.868068		0.776827		0.838438		0.687636
	0.0881			0.932898		0.868176		0.777005		0.838572		0.687877
	0.0882			0.932952		0.868283		0.777182		0.838704		0.688122
	0.0883			0.933006		0.86839		0.77736		0.838835		0.688372
	0.0884			0.933059		0.868498		0.777537		0.838969		0.688618
	0.0885			0.933113		0.868606		0.777716		0.839104		0.688862
	0.0886			0.933167		0.868713		0.777888		0.839238		0.68911
	0.0887			0.93322		0.868821		0.778062		0.839374		0.689353
	0.0888			0.933273		0.86893		0.778234		0.839504		0.689593
	0.0889			0.933326		0.869039		0.77841		0.83963		0.689835
	0.089			0.93338		0.869147		0.778577		0.83976		0.690081
	0.0891			0.933435		0.869253		0.778737		0.839897		0.690324
	0.0892			0.93349		0.869361		0.778913		0.840032		0.690565
	0.0893			0.933543		0.869467		0.779084		0.840163		0.690809
	0.0894			0.933599		0.869573		0.779259		0.840295		0.691052
	0.0895			0.933651		0.869678		0.779431		0.840429		0.691298
	0.0896			0.933704		0.869781		0.779608		0.840563		0.691548
	0.0897			0.933757		0.869883		0.779782		0.840697		0.691798
	0.0898			0.933811		0.869984		0.779956		0.840828		0.692054
	0.0899			0.933864		0.870087		0.780126		0.84096		0.692308
	0.09			0.933916		0.870189		0.7803		0.841099		0.692559
	0.0901			0.933969		0.87029		0.78047		0.841235		0.692813
	0.0902			0.934023		0.87039		0.780633		0.841368		0.693065
	0.0903			0.934077		0.870489		0.7808		0.841501		0.693318
	0.0904			0.934132		0.870587		0.780967		0.841633		0.693571
	0.0905			0.934184		0.870683		0.781126		0.841765		0.693816
	0.0906			0.934236		0.870782		0.781303		0.8419		0.694067
	0.0907			0.934289		0.870881		0.781478		0.842025		0.694321
	0.0908			0.93434		0.870981		0.781638		0.842151		0.694572
	0.0909			0.93439		0.871081		0.781803		0.842279		0.69482
	0.091			0.934442		0.871177		0.781966		0.842411		0.695071
	0.0911			0.934493		0.87128		0.78213		0.842544		0.695318
	0.0912			0.934546		0.871379		0.782292		0.84267		0.695566
	0.0913			0.9346		0.871476		0.782443		0.842796		0.695809
	0.0914			0.934652		0.871578		0.7826		0.842927		0.696055
	0.0915			0.934704		0.871678		0.78277		0.843053		0.696301
	0.0916			0.934756		0.871776		0.782944		0.84318		0.696546
	0.0917			0.934809		0.871879		0.783113		0.843306		0.696791
	0.0918			0.934863		0.871984		0.78328		0.843431		0.697044
	0.0919			0.934917		0.872082		0.783439		0.843558		0.6973
	0.092			0.934968		0.872179		0.78361		0.843683		0.69755
	0.0921			0.935019		0.872276		0.783781		0.843802		0.697798
	0.0922			0.935071		0.872373		0.783945		0.843919		0.698046
	0.0923			0.935123		0.872471		0.78411		0.844041		0.698288
	0.0924			0.935173		0.872569		0.784265		0.844159		0.69853
	0.0925			0.935225		0.872668		0.784421		0.844274		0.698767
	0.0926			0.935277		0.872767		0.784589		0.844397		0.699002
	0.0927			0.935327		0.872865		0.784752		0.844519		0.699238
	0.0928			0.935378		0.872962		0.784911		0.844634		0.699474
	0.0929			0.935428		0.873059		0.785066		0.844753		0.699717
	0.093			0.935477		0.873159		0.785215		0.844876		0.699958
	0.0931			0.935527		0.873259		0.785369		0.844998		0.700201
	0.0932			0.935578		0.873361		0.785524		0.845121		0.700444
	0.0933			0.935627		0.87346		0.785696		0.84524		0.700689
	0.0934			0.935677		0.873559		0.785868		0.845364		0.700935
	0.0935			0.935729		0.873656		0.786035		0.84549		0.701176
	0.0936			0.935781		0.873751		0.786207		0.845614		0.701415
	0.0937			0.935832		0.873845		0.78637		0.845737		0.701653
	0.0938			0.935882		0.873938		0.786527		0.845862		0.701892
	0.0939			0.935933		0.874031		0.786692		0.84599		0.702129
	0.094			0.935985		0.874125		0.78686		0.846115		0.702363
	0.0941			0.936035		0.87422		0.787034		0.846242		0.702601
	0.0942			0.936086		0.874312		0.787197		0.846367		0.702844
	0.0943			0.936138		0.874404		0.787367		0.846494		0.703076
	0.0944			0.936189		0.874497		0.787548		0.84662		0.703308
	0.0945			0.93624		0.87459		0.78772		0.846738		0.703547
	0.0946			0.93629		0.874684		0.787887		0.846852		0.703783
	0.0947			0.936341		0.874779		0.788046		0.846979		0.704019
	0.0948			0.936392		0.874874		0.788201		0.847103		0.704254
	0.0949			0.93644		0.874968		0.788361		0.847226		0.70449
	0.095			0.936489		0.875061		0.788526		0.847351		0.704726
	0.0951			0.93654		0.875155		0.788699		0.847475		0.704959
	0.0952			0.93659		0.875249		0.78887		0.847598		0.705197
	0.0953			0.93664		0.875343		0.789049		0.847722		0.705432
	0.0954			0.93669		0.875438		0.789228		0.847849		0.705666
	0.0955			0.93674		0.875534		0.789393		0.847974		0.705901
	0.0956			0.936791		0.875627		0.789562		0.848098		0.706134
	0.0957			0.936839		0.875723		0.789735		0.848224		0.706366
	0.0958			0.936887		0.875819		0.789912		0.848347		0.7066
	0.0959			0.936936		0.875913		0.790086		0.848467		0.706836
	0.096			0.936984		0.87601		0.79027		0.848589		0.707072
	0.0961			0.937033		0.876105		0.790445		0.84871		0.707307
	0.0962			0.937082		0.8762		0.790623		0.848827		0.707547
	0.0963			0.937131		0.8763		0.790807		0.84895		0.707784
	0.0964			0.937179		0.876401		0.790995		0.849074		0.708025
	0.0965			0.937228		0.876499		0.791184		0.8492		0.70826
	0.0966			0.937277		0.876595		0.791379		0.849322		0.708497
	0.0967			0.937325		0.87669		0.791557		0.849445		0.708733
	0.0968			0.937372		0.876788		0.791739		0.84957		0.708966
	0.0969			0.93742		0.876885		0.791932		0.849693		0.709197
	0.097			0.937468		0.876981		0.792119		0.849814		0.709424
	0.0971			0.937516		0.877076		0.792301		0.849932		0.709654
	0.0972			0.937564		0.877171		0.792478		0.850053		0.709885
	0.0973			0.937612		0.877265		0.79265		0.850171		0.710107
	0.0974			0.937661		0.877358		0.79284		0.85029		0.710332
	0.0975			0.93771		0.877455		0.79303		0.850403		0.710556
	0.0976			0.937759		0.87755		0.79321		0.850515		0.710785
	0.0977			0.937808		0.877644		0.793389		0.850628		0.711015
	0.0978			0.937857		0.877739		0.793572		0.85074		0.711244
	0.0979			0.937905		0.877834		0.793761		0.85085		0.711475
	0.098			0.937953		0.877929		0.793946		0.850967		0.711708
	0.0981			0.938001		0.878024		0.794129		0.851086		0.711942
	0.0982			0.93805		0.878121		0.794304		0.851196		0.712171
	0.0983			0.938099		0.878221		0.794483		0.851304		0.712397
	0.0984			0.938146		0.87832		0.794654		0.851415		0.712625
	0.0985			0.938194		0.878418		0.794827		0.851528		0.712853
	0.0986			0.938243		0.878518		0.795006		0.85164		0.713083
	0.0987			0.938292		0.87862		0.795187		0.851755		0.713313
	0.0988			0.938339		0.878717		0.795372		0.851869		0.713538
	0.0989			0.938387		0.878813		0.795564		0.851985		0.713769
	0.099			0.938435		0.878913		0.795752		0.852099		0.713997
	0.0991			0.938484		0.87901		0.795935		0.852216		0.714224
	0.0992			0.93853		0.879105		0.796111		0.85233		0.714452
	0.0993			0.938578		0.879201		0.796298		0.852445		0.714681
	0.0994			0.938626		0.879297		0.796492		0.852552		0.714907
	0.0995			0.938673		0.879393		0.79667		0.852663		0.715137
	0.0996			0.938721		0.87949		0.796851		0.852773		0.715361
	0.0997			0.938768		0.879585		0.797025		0.852881		0.715584
	0.0998			0.938814		0.879681		0.797196		0.852989		0.715807
	0.0999			0.938862		0.879776		0.797361		0.853101		0.716029
	0.1			0.93891		0.87987		0.797539		0.853211		0.716248
	0.1001			0.938957		0.879966		0.797707		0.853321		0.716474
	0.1002			0.939006		0.880061		0.797881		0.853431		0.7167
	0.1003			0.939056		0.880153		0.798062		0.853536		0.716923
	0.1004			0.939105		0.880242		0.798243		0.853642		0.717153
	0.1005			0.939152		0.880335		0.798417		0.853753		0.717378
	0.1006			0.9392		0.880428		0.798593		0.853863		0.717603
	0.1007			0.939249		0.880521		0.798762		0.853971		0.717826
	0.1008			0.939299		0.880614		0.798927		0.854084		0.718045
	0.1009			0.939347		0.880706		0.799105		0.854192		0.718272
	0.101			0.939395		0.880797		0.799277		0.854304		0.718497
	0.1011			0.939443		0.88089		0.799439		0.854418		0.718715
	0.1012			0.93949		0.880982		0.799605		0.854533		0.718934
	0.1013			0.939535		0.881073		0.799775		0.854651		0.719158
	0.1014			0.939581		0.881167		0.799945		0.854769		0.719378
	0.1015			0.939628		0.881264		0.800122		0.854888		0.719601
	0.1016			0.939676		0.881357		0.800293		0.85501		0.71982
	0.1017			0.939723		0.881452		0.800465		0.855134		0.720039
	0.1018			0.939769		0.881548		0.800634		0.855253		0.720259
	0.1019			0.939816		0.881641		0.800815		0.855371		0.720478
	0.102			0.939863		0.881735		0.800992		0.855494		0.720697
	0.1021			0.93991		0.881829		0.801155		0.855616		0.720916
	0.1022			0.939957		0.881921		0.801309		0.85574		0.721137
	0.1023			0.940004		0.882016		0.801468		0.855856		0.721355
	0.1024			0.940051		0.882107		0.801627		0.855973		0.721567
	0.1025			0.940099		0.882197		0.801789		0.856094		0.721778
	0.1026			0.940147		0.88229		0.801945		0.856208		0.721989
	0.1027			0.940194		0.88238		0.802115		0.856326		0.722201
	0.1028			0.940241		0.882472		0.802275		0.856441		0.722411
	0.1029			0.940289		0.882566		0.802433		0.856562		0.72262
	0.103			0.940336		0.882657		0.802607		0.85668		0.722828
	0.1031			0.94038		0.882747		0.802767		0.856799		0.723037
	0.1032			0.940426		0.882836		0.802937		0.856914		0.723243
	0.1033			0.940472		0.882926		0.803115		0.85703		0.72345
	0.1034			0.940516		0.883017		0.803279		0.857142		0.723663
	0.1035			0.94056		0.883105		0.803448		0.857252		0.72387
	0.1036			0.940606		0.883191		0.803624		0.857371		0.72407
	0.1037			0.94065		0.883278		0.803785		0.857491		0.724276
	0.1038			0.940695		0.883365		0.803945		0.857616		0.724489
	0.1039			0.94074		0.883453		0.804104		0.857734		0.724703
	0.104			0.940783		0.88354		0.804268		0.857847		0.724916
	0.1041			0.940829		0.88363		0.804443		0.857961		0.725127
	0.1042			0.940874		0.883718		0.804607		0.858078		0.725338
	0.1043			0.940917		0.883806		0.804768		0.858191		0.725551
	0.1044			0.940962		0.883894		0.804929		0.858306		0.725759
	0.1045			0.941007		0.883981		0.805095		0.858423		0.725969
	0.1046			0.941052		0.88407		0.805252		0.858537		0.726178
	0.1047			0.941097		0.884161		0.805423		0.858649		0.726386
	0.1048			0.941141		0.884252		0.805591		0.858762		0.726593
	0.1049			0.941187		0.884342		0.805754		0.858874		0.726799
	0.105			0.941233		0.884432		0.805929		0.858985		0.727003
	0.1051			0.941277		0.884522		0.806095		0.8591		0.727206
	0.1052			0.941322		0.884613		0.806259		0.859217		0.727406
	0.1053			0.941366		0.884704		0.80643		0.859328		0.727606
	0.1054			0.941409		0.88479		0.8066		0.859437		0.727806
	0.1055			0.941453		0.884878		0.806767		0.859549		0.728007
	0.1056			0.941496		0.884968		0.806927		0.859658		0.728208
	0.1057			0.94154		0.885058		0.807089		0.859767		0.728412
	0.1058			0.941583		0.885148		0.807248		0.859875		0.728616
	0.1059			0.941626		0.885237		0.80741		0.859985		0.728821
	0.106			0.941669		0.885327		0.807565		0.860098		0.729023
	0.1061			0.941712		0.885412		0.807722		0.860206		0.729224
	0.1062			0.941755		0.885497		0.807886		0.860317		0.729432
	0.1063			0.941799		0.885584		0.808049		0.860426		0.729631
	0.1064			0.941842		0.885672		0.808202		0.860533		0.729832
	0.1065			0.941885		0.885758		0.808358		0.86064		0.730031
	0.1066			0.941928		0.885844		0.808532		0.860743		0.730231
	0.1067			0.941972		0.885932		0.808699		0.86085		0.730434
	0.1068			0.942017		0.886019		0.80886		0.86096		0.730634
	0.1069			0.942061		0.886104		0.809034		0.861066		0.730837
	0.107			0.942105		0.886192		0.809186		0.861171		0.73104
	0.1071			0.942148		0.886281		0.809339		0.861275		0.731244
	0.1072			0.942191		0.886367		0.809497		0.861378		0.731451
	0.1073			0.942235		0.886452		0.809659		0.861485		0.731655
	0.1074			0.942277		0.886538		0.809805		0.861591		0.731856
	0.1075			0.94232		0.886625		0.809951		0.861702		0.732053
	0.1076			0.942362		0.88671		0.810106		0.86181		0.732255
	0.1077			0.942404		0.886797		0.810252		0.861916		0.732455
	0.1078			0.942446		0.886882		0.810388		0.862016		0.732654
	0.1079			0.94249		0.886966		0.810529		0.86212		0.732851
	0.108			0.942533		0.887051		0.810657		0.862224		0.73305
	0.1081			0.942576		0.887137		0.810786		0.86232		0.733245
	0.1082			0.942618		0.88722		0.810912		0.862414		0.733443
	0.1083			0.942661		0.887307		0.811037		0.862509		0.733641
	0.1084			0.942702		0.887392		0.811168		0.862608		0.733833
	0.1085			0.942743		0.887475		0.811293		0.862711		0.734026
	0.1086			0.942786		0.887562		0.81141		0.862812		0.73422
	0.1087			0.942829		0.887649		0.811534		0.862906		0.73442
	0.1088			0.942872		0.887737		0.811653		0.863002		0.734614
	0.1089			0.942915		0.887823		0.811788		0.863102		0.734811
	0.109			0.942959		0.887907		0.811918		0.863202		0.73501
	0.1091			0.943001		0.887995		0.81204		0.863305		0.735204
	0.1092			0.943043		0.888081		0.812169		0.863414		0.735397
	0.1093			0.943085		0.888169		0.812306		0.863518		0.735592
	0.1094			0.943127		0.888258		0.812446		0.863619		0.735788
	0.1095			0.943168		0.888345		0.812582		0.863725		0.735986
	0.1096			0.94321		0.88843		0.812711		0.863829		0.736185
	0.1097			0.943252		0.888518		0.81284		0.863936		0.736387
	0.1098			0.943292		0.888608		0.812959		0.864044		0.736591
	0.1099			0.943332		0.888695		0.813078		0.864146		0.73679
	0.11			0.943373		0.888782		0.813206		0.864252		0.736993
	0.1101			0.943414		0.88887		0.813321		0.864353		0.737197
	0.1102			0.943453		0.888957		0.81343		0.864456		0.737394
	0.1103			0.943494		0.889046		0.813564		0.86456		0.737595
	0.1104			0.943536		0.889136		0.813684		0.864664		0.737797
	0.1105			0.943577		0.889226		0.813805		0.864772		0.737999
	0.1106			0.943619		0.889317		0.813933		0.864876		0.738203
	0.1107			0.943661		0.889406		0.814064		0.864977		0.738404
	0.1108			0.943702		0.889497		0.814193		0.865078		0.738599
	0.1109			0.943742		0.889588		0.814317		0.865181		0.738797
	0.111			0.943782		0.88968		0.814457		0.865283		0.738999
	0.1111			0.943821		0.889773		0.814594		0.865385		0.739201
	0.1112			0.943862		0.889865		0.814722		0.865482		0.739401
	0.1113			0.943903		0.889957		0.814858		0.865575		0.739604
	0.1114			0.943943		0.89005		0.814999		0.865672		0.739806
	0.1115			0.943982		0.890142		0.815141		0.865775		0.740012
	0.1116			0.944023		0.890234		0.815277		0.865878		0.740215
	0.1117			0.944063		0.890326		0.815412		0.865978		0.740418
	0.1118			0.944103		0.890417		0.815535		0.866082		0.74062
	0.1119			0.944143		0.890511		0.815663		0.866182		0.740828
	0.112			0.944182		0.890605		0.815804		0.866279		0.741028
	0.1121			0.944222		0.890697		0.815937		0.866372		0.741229
	0.1122			0.944262		0.890789		0.816067		0.866465		0.741429
	0.1123			0.944301		0.89088		0.816198		0.86656		0.741626
	0.1124			0.94434		0.890968		0.816336		0.866652		0.741821
	0.1125			0.944382		0.891056		0.81647		0.866744		0.742019
	0.1126			0.944423		0.891146		0.816602		0.866836		0.742221
	0.1127			0.944463		0.891237		0.816739		0.866926		0.742415
	0.1128			0.944504		0.891329		0.816874		0.867017		0.742607
	0.1129			0.944545		0.891421		0.817005		0.867114		0.742803
	0.113			0.944587		0.891511		0.817145		0.867209		0.743001
	0.1131			0.944629		0.891602		0.817282		0.867295		0.743201
	0.1132			0.94467		0.891693		0.817424		0.86738		0.743395
	0.1133			0.944711		0.891785		0.817567		0.867473		0.743588
	0.1134			0.94475		0.891875		0.817708		0.867565		0.743786
	0.1135			0.944788		0.891966		0.81785		0.86766		0.743977
	0.1136			0.944827		0.892059		0.817981		0.867755		0.744177
	0.1137			0.944866		0.89215		0.818122		0.867852		0.744376
	0.1138			0.944905		0.89224		0.818266		0.867942		0.744572
	0.1139			0.944945		0.892329		0.818402		0.868034		0.744774
	0.114			0.944985		0.892419		0.818545		0.868127		0.744976
	0.1141			0.945025		0.892505		0.818691		0.86822		0.745174
	0.1142			0.945064		0.892591		0.818834		0.868314		0.745371
	0.1143			0.945104		0.892678		0.818967		0.868408		0.745565
	0.1144			0.945144		0.892768		0.819095		0.868504		0.745759
	0.1145			0.945183		0.892854		0.819231		0.868597		0.745959
	0.1146			0.945222		0.892942		0.819355		0.868695		0.746156
	0.1147			0.945261		0.893026		0.819496		0.868793		0.746354
	0.1148			0.9453		0.893113		0.819629		0.868885		0.746547
	0.1149			0.945338		0.893197		0.819755		0.86898		0.746742
	0.115			0.945379		0.893281		0.81989		0.869078		0.746941
	0.1151			0.945419		0.893366		0.820018		0.869181		0.74714
	0.1152			0.945459		0.893451		0.820151		0.86928		0.747334
	0.1153			0.945499		0.893537		0.820284		0.869378		0.747533
	0.1154			0.945538		0.893623		0.820414		0.869476		0.747733
	0.1155			0.945578		0.893707		0.820543		0.869576		0.747936
	0.1156			0.945619		0.893792		0.820675		0.869673		0.748131
	0.1157			0.945659		0.893875		0.820813		0.86977		0.748325
	0.1158			0.945698		0.893956		0.820961		0.869871		0.748521
	0.1159			0.945739		0.894037		0.821101		0.869973		0.748715
	0.116			0.945779		0.894118		0.821238		0.87007		0.748914
	0.1161			0.945819		0.894199		0.821375		0.870166		0.749105
	0.1162			0.945859		0.894281		0.821526		0.870267		0.749296
	0.1163			0.945899		0.894361		0.821683		0.870371		0.749492
	0.1164			0.945938		0.894442		0.821832		0.870477		0.749684
	0.1165			0.945977		0.894525		0.821986		0.870574		0.749882
	0.1166			0.946018		0.894606		0.822141		0.870673		0.750077
	0.1167			0.94606		0.894687		0.822294		0.870775		0.750271
	0.1168			0.946099		0.894767		0.822441		0.870871		0.750462
	0.1169			0.946139		0.894847		0.822599		0.870971		0.750656
	0.117			0.94618		0.894927		0.822763		0.871066		0.750843
	0.1171			0.94622		0.895005		0.822924		0.871166		0.751033
	0.1172			0.94626		0.895081		0.823076		0.871263		0.751229
	0.1173			0.946299		0.895157		0.823234		0.871361		0.751424
	0.1174			0.94634		0.895231		0.823388		0.87146		0.751613
	0.1175			0.94638		0.895304		0.823536		0.871559		0.751806
	0.1176			0.946421		0.895381		0.823675		0.871655		0.751996
	0.1177			0.946461		0.895457		0.823812		0.871753		0.752185
	0.1178			0.946503		0.895532		0.823944		0.871849		0.752372
	0.1179			0.946543		0.89561		0.824083		0.871942		0.752561
	0.118			0.946583		0.895684		0.824216		0.872041		0.752749
	0.1181			0.946623		0.89576		0.824337		0.872139		0.752937
	0.1182			0.946661		0.895838		0.824457		0.872237		0.753129
	0.1183			0.9467		0.895913		0.824589		0.872331		0.753318
	0.1184			0.946741		0.895986		0.824729		0.872428		0.753506
	0.1185			0.946782		0.896059		0.82487		0.872526		0.753698
	0.1186			0.946822		0.896133		0.825006		0.872629		0.753887
	0.1187			0.946861		0.896209		0.825146		0.872726		0.754073
	0.1188			0.9469		0.896282		0.825268		0.872821		0.754261
	0.1189			0.946939		0.896354		0.825395		0.872918		0.754452
	0.119			0.94698		0.896427		0.825526		0.873016		0.754637
	0.1191			0.947021		0.896501		0.825647		0.873114		0.754821
	0.1192			0.947062		0.896575		0.825779		0.87321		0.755006
	0.1193			0.947101		0.896649		0.825917		0.873307		0.755197
	0.1194			0.947138		0.896723		0.826059		0.873409		0.755384
	0.1195			0.947176		0.896795		0.826206		0.873514		0.755571
	0.1196			0.947215		0.896869		0.826342		0.873617		0.755755
	0.1197			0.947253		0.89694		0.826483		0.873718		0.755939
	0.1198			0.947291		0.897013		0.826623		0.87382		0.756125
	0.1199			0.947328		0.897085		0.826762		0.873924		0.756309
	0.12			0.947365		0.897158		0.826908		0.874028		0.75649
	0.1201			0.947403		0.897232		0.827053		0.874132		0.756675
	0.1202			0.947439		0.897307		0.8272		0.874237		0.756857
	0.1203			0.947476		0.897383		0.82734		0.874341		0.757036
	0.1204			0.947514		0.897459		0.827479		0.874444		0.757216
	0.1205			0.947553		0.897535		0.827621		0.87455		0.757394
	0.1206			0.947592		0.897609		0.827766		0.874652		0.757575
	0.1207			0.94763		0.897688		0.827909		0.874753		0.757753
	0.1208			0.947669		0.897765		0.828055		0.87485		0.75793
	0.1209			0.947708		0.897845		0.828201		0.874947		0.75811
	0.121			0.947746		0.897923		0.828344		0.875045		0.758283
	0.1211			0.947784		0.898004		0.828482		0.875143		0.758456
	0.1212			0.947823		0.898082		0.828614		0.875242		0.758634
	0.1213			0.947862		0.898158		0.828746		0.875345		0.758814
	0.1214			0.9479		0.898233		0.828891		0.875447		0.758989
	0.1215			0.947938		0.898309		0.82902		0.875545		0.759172
	0.1216			0.947976		0.898386		0.829143		0.875641		0.759355
	0.1217			0.948013		0.898465		0.829271		0.875738		0.759535
	0.1218			0.94805		0.898544		0.829404		0.875834		0.759711
	0.1219			0.948089		0.898624		0.829527		0.875932		0.759892
	0.122			0.948126		0.8987		0.829649		0.876022		0.760073
	0.1221			0.948162		0.898778		0.829778		0.876119		0.76025
	0.1222			0.948199		0.898858		0.829909		0.876218		0.760427
	0.1223			0.948236		0.898938		0.830039		0.876312		0.76061
	0.1224			0.948273		0.899017		0.830169		0.876406		0.760787
	0.1225			0.94831		0.899093		0.830294		0.876498		0.760967
	0.1226			0.948347		0.899172		0.83041		0.876587		0.761143
	0.1227			0.948383		0.899253		0.830519		0.876679		0.761317
	0.1228			0.948419		0.899331		0.830624		0.876776		0.761489
	0.1229			0.948456		0.899407		0.830749		0.87687		0.761671
	0.123			0.948494		0.899487		0.830862		0.876957		0.761853
	0.1231			0.948531		0.899566		0.830988		0.877051		0.762033
	0.1232			0.948567		0.89964		0.831102		0.877147		0.762211
	0.1233			0.948605		0.899718		0.831211		0.877241		0.76239
	0.1234			0.948642		0.899795		0.831325		0.877331		0.762566
	0.1235			0.948679		0.899869		0.831445		0.877418		0.762739
	0.1236			0.948716		0.899944		0.831561		0.877514		0.762912
	0.1237			0.948753		0.900022		0.83167		0.877607		0.763084
	0.1238			0.948789		0.900096		0.831782		0.877698		0.763255
	0.1239			0.948827		0.900172		0.831892		0.877789		0.763425
	0.124			0.948864		0.900245		0.83201		0.877883		0.7636
	0.1241			0.948901		0.900317		0.832125		0.877973		0.763774
	0.1242			0.948938		0.900388		0.832245		0.878063		0.76395
	0.1243			0.948975		0.90046		0.832367		0.878153		0.764123
	0.1244			0.949011		0.900531		0.8325		0.878244		0.764295
	0.1245			0.949048		0.900605		0.832632		0.878336		0.764473
	0.1246			0.949084		0.900676		0.83275		0.878429		0.764646
	0.1247			0.949121		0.900749		0.832868		0.878523		0.764821
	0.1248			0.949158		0.900823		0.832997		0.878615		0.764993
	0.1249			0.949194		0.900895		0.833133		0.878705		0.765168
	0.125			0.949232		0.900968		0.833259		0.878797		0.765351
	0.1251			0.949267		0.901042		0.833393		0.878885		0.76553
	0.1252			0.949303		0.901113		0.833533		0.878975		0.765709
	0.1253			0.949339		0.901184		0.833663		0.879069		0.765891
	0.1254			0.949374		0.901254		0.833792		0.879161		0.766076
	0.1255			0.949408		0.901325		0.833925		0.879254		0.766258
	0.1256			0.949442		0.901393		0.834057		0.879344		0.766434
	0.1257			0.949476		0.901463		0.834185		0.879433		0.766609
	0.1258			0.949512		0.901537		0.834312		0.879527		0.766789
	0.1259			0.949547		0.901609		0.834445		0.879616		0.76697
	0.126			0.949582		0.901683		0.834581		0.879707		0.767147
	0.1261			0.949617		0.901757		0.834707		0.879798		0.767329
	0.1262			0.949651		0.90183		0.834826		0.879887		0.767511
	0.1263			0.949685		0.901904		0.834948		0.879979		0.76769
	0.1264			0.949719		0.901977		0.835073		0.880066		0.76787
	0.1265			0.949755		0.902049		0.835197		0.88016		0.768052
	0.1266			0.94979		0.90212		0.835327		0.880256		0.768232
	0.1267			0.949824		0.902194		0.835459		0.880347		0.768409
	0.1268			0.949859		0.902273		0.835582		0.880437		0.768585
	0.1269			0.949894		0.902349		0.835701		0.880525		0.768766
	0.127			0.949929		0.902422		0.835815		0.880615		0.768944
	0.1271			0.949963		0.902496		0.835937		0.880706		0.769122
	0.1272			0.949998		0.902571		0.836058		0.880794		0.769299
	0.1273			0.950032		0.902644		0.836186		0.88088		0.769478
	0.1274			0.950067		0.902716		0.836316		0.880971		0.769652
	0.1275			0.950102		0.90279		0.836449		0.881064		0.769826
	0.1276			0.950136		0.902863		0.836583		0.881157		0.769999
	0.1277			0.950172		0.902936		0.836712		0.881249		0.770175
	0.1278			0.950205		0.903011		0.836837		0.881339		0.770352
	0.1279			0.950239		0.903083		0.836956		0.881435		0.770527
	0.128			0.950274		0.903159		0.837068		0.88153		0.7707
	0.1281			0.95031		0.903234		0.837181		0.88162		0.770871
	0.1282			0.950345		0.903308		0.837298		0.88171		0.771048
	0.1283			0.95038		0.903384		0.837418		0.881799		0.771228
	0.1284			0.950415		0.903461		0.837536		0.881891		0.7714
	0.1285			0.95045		0.90354		0.837647		0.881978		0.77157
	0.1286			0.950486		0.903618		0.837746		0.882065		0.771738
	0.1287			0.950523		0.903697		0.837859		0.882154		0.771911
	0.1288			0.950559		0.903777		0.837976		0.882242		0.772084
	0.1289			0.950594		0.903858		0.838087		0.882328		0.77226
	0.129			0.950628		0.90394		0.838206		0.882416		0.772431
	0.1291			0.950661		0.90402		0.838323		0.882504		0.772602
	0.1292			0.950696		0.904099		0.838444		0.88259		0.772774
	0.1293			0.950732		0.904177		0.838555		0.882675		0.772948
	0.1294			0.950766		0.904257		0.838674		0.88276		0.773118
	0.1295			0.9508		0.904333		0.838791		0.88285		0.773282
	0.1296			0.950833		0.904409		0.838915		0.882941		0.773445
	0.1297			0.950867		0.904485		0.839039		0.883026		0.773613
	0.1298			0.950902		0.904561		0.839161		0.883114		0.773784
	0.1299			0.950936		0.904641		0.839274		0.883203		0.773948
	0.13			0.950968		0.904721		0.83938		0.883288		0.774111
	0.1301			0.951		0.904801		0.839505		0.883371		0.774276
	0.1302			0.951031		0.90488		0.839616		0.883459		0.774444
	0.1303			0.951064		0.904959		0.839723		0.883543		0.774611
	0.1304			0.951098		0.905035		0.839829		0.883623		0.77478
	0.1305			0.951132		0.905107		0.839935		0.883706		0.774949
	0.1306			0.951165		0.905181		0.840055		0.88379		0.775121
	0.1307			0.951198		0.905255		0.840181		0.883877		0.775289
	0.1308			0.951232		0.905331		0.840285		0.883966		0.775459
	0.1309			0.951266		0.905407		0.840386		0.884051		0.77563
	0.131			0.9513		0.90548		0.840491		0.884141		0.775798
	0.1311			0.951335		0.905549		0.840591		0.884234		0.775969
	0.1312			0.95137		0.905621		0.8407		0.88432		0.776138
	0.1313			0.951403		0.905692		0.840808		0.884406		0.776305
	0.1314			0.951436		0.905764		0.840919		0.884497		0.776474
	0.1315			0.951468		0.905835		0.84103		0.884589		0.776644
	0.1316			0.951502		0.905905		0.841129		0.884676		0.776816
	0.1317			0.951536		0.905977		0.841234		0.884766		0.776985
	0.1318			0.951569		0.906049		0.841341		0.884854		0.777155
	0.1319			0.951603		0.906121		0.841453		0.884944		0.777323
	0.132			0.951636		0.906191		0.841548		0.885034		0.777493
	0.1321			0.951669		0.906259		0.841636		0.885116		0.777663
	0.1322			0.951703		0.906328		0.841739		0.885198		0.77783
	0.1323			0.951738		0.906399		0.841847		0.885277		0.777999
	0.1324			0.951771		0.906471		0.84195		0.885363		0.778168
	0.1325			0.951804		0.906544		0.842051		0.885449		0.778334
	0.1326			0.95184		0.906616		0.842155		0.885525		0.778496
	0.1327			0.951874		0.906686		0.842258		0.885606		0.778656
	0.1328			0.951908		0.906756		0.842366		0.885687		0.778815
	0.1329			0.951942		0.906826		0.842472		0.885769		0.778977
	0.133			0.951978		0.906895		0.842575		0.885856		0.779138
	0.1331			0.952014		0.906968		0.842684		0.885938		0.779302
	0.1332			0.95205		0.907041		0.842791		0.886015		0.77947
	0.1333			0.952086		0.907112		0.842891		0.886097		0.779638
	0.1334			0.952122		0.907184		0.843004		0.886181		0.7798
	0.1335			0.952159		0.907255		0.843113		0.886267		0.779965
	0.1336			0.952196		0.907327		0.84322		0.886344		0.780136
	0.1337			0.952231		0.907398		0.843314		0.886421		0.780301
	0.1338			0.952266		0.907466		0.843425		0.886505		0.780463
	0.1339			0.952302		0.907537		0.843529		0.886586		0.780627
	0.134			0.952337		0.907605		0.843645		0.886671		0.780791
	0.1341			0.952372		0.907676		0.843769		0.886751		0.780955
	0.1342			0.952408		0.907745		0.843888		0.886831		0.781117
	0.1343			0.952443		0.907812		0.844009		0.886911		0.781276
	0.1344			0.95248		0.907881		0.844119		0.886991		0.781431
	0.1345			0.952516		0.907951		0.844234		0.887068		0.781584
	0.1346			0.95255		0.908018		0.844358		0.887151		0.781737
	0.1347			0.952586		0.908085		0.844469		0.887233		0.78189
	0.1348			0.952621		0.908152		0.844592		0.887317		0.782044
	0.1349			0.952655		0.908215		0.844715		0.887401		0.782195
	0.135			0.952688		0.908282		0.844834		0.887488		0.782346
	0.1351			0.952722		0.90835		0.84495		0.88757		0.782494
	0.1352			0.952758		0.908416		0.845068		0.887649		0.782645
	0.1353			0.952791		0.908481		0.845184		0.887729		0.782793
	0.1354			0.952826		0.908545		0.845299		0.887812		0.782938
	0.1355			0.952859		0.908609		0.845412		0.887895		0.783086
	0.1356			0.952892		0.908676		0.845524		0.887981		0.783236
	0.1357			0.952925		0.908744		0.845641		0.888066		0.783385
	0.1358			0.952958		0.908813		0.845755		0.888147		0.783534
	0.1359			0.95299		0.908884		0.84587		0.888228		0.783678
	0.136			0.953023		0.908951		0.845974		0.888311		0.783817
	0.1361			0.953055		0.909017		0.846065		0.888392		0.783961
	0.1362			0.953089		0.909084		0.846169		0.888474		0.784108
	0.1363			0.953122		0.90915		0.846274		0.888556		0.784254
	0.1364			0.953155		0.909218		0.846381		0.888643		0.784397
	0.1365			0.953187		0.909289		0.846481		0.888727		0.78454
	0.1366			0.95322		0.909361		0.846587		0.888812		0.78468
	0.1367			0.953254		0.909428		0.846684		0.888899		0.784822
	0.1368			0.953287		0.909498		0.846786		0.888983		0.784963
	0.1369			0.953321		0.909568		0.846887		0.889066		0.785111
	0.137			0.953354		0.909636		0.847005		0.889148		0.785256
	0.1371			0.953387		0.909701		0.847105		0.889229		0.7854
	0.1372			0.95342		0.909767		0.847204		0.889307		0.785546
	0.1373			0.95345		0.909834		0.847319		0.889381		0.785689
	0.1374			0.953484		0.909902		0.847433		0.889459		0.785837
	0.1375			0.953517		0.909974		0.84755		0.889538		0.785983
	0.1376			0.95355		0.910043		0.847656		0.889613		0.786129
	0.1377			0.953583		0.910111		0.847771		0.889688		0.786284
	0.1378			0.953615		0.910179		0.847887		0.889766		0.786439
	0.1379			0.953648		0.910242		0.848007		0.889838		0.786592
	0.138			0.95368		0.910304		0.848125		0.889914		0.786744
	0.1381			0.953711		0.910367		0.848235		0.889988		0.786904
	0.1382			0.953743		0.910431		0.848352		0.890065		0.787057
	0.1383			0.953775		0.910493		0.848464		0.890142		0.787211
	0.1384			0.95381		0.910557		0.848576		0.890221		0.787372
	0.1385			0.953844		0.910623		0.848702		0.890301		0.78753
	0.1386			0.953877		0.910689		0.848821		0.890385		0.787686
	0.1387			0.953909		0.910753		0.848928		0.890464		0.787841
	0.1388			0.953942		0.910818		0.849031		0.890545		0.787994
	0.1389			0.953977		0.910885		0.849148		0.890628		0.788152
	0.139			0.954011		0.91095		0.849254		0.890704		0.788311
	0.1391			0.954044		0.911014		0.849353		0.890778		0.78847
	0.1392			0.954077		0.911078		0.849459		0.890855		0.788624
	0.1393			0.95411		0.911143		0.849561		0.890928		0.788778
	0.1394			0.954144		0.911209		0.849668		0.891005		0.788935
	0.1395			0.954179		0.911275		0.849776		0.891082		0.789092
	0.1396			0.954214		0.911342		0.849888		0.89116		0.789253
	0.1397			0.954248		0.911409		0.849997		0.891239		0.789413
	0.1398			0.954279		0.911477		0.850097		0.891321		0.789567
	0.1399			0.95431		0.911544		0.850205		0.891405		0.789717
	0.14			0.954343		0.911613		0.850313		0.891487		0.789873
	0.1401			0.954374		0.911682		0.850421		0.891566		0.79003
	0.1402			0.954405		0.911748		0.850533		0.891644		0.790187
	0.1403			0.954438		0.911816		0.850632		0.891727		0.790341
	0.1404			0.954472		0.911882		0.850739		0.89181		0.790497
	0.1405			0.954504		0.911947		0.850845		0.891888		0.790656
	0.1406			0.954536		0.912011		0.850942		0.891964		0.790816
	0.1407			0.954569		0.912075		0.851044		0.892046		0.790977
	0.1408			0.954602		0.912143		0.851138		0.892127		0.791135
	0.1409			0.954634		0.912208		0.851231		0.892209		0.791298
	0.141			0.954665		0.912273		0.851337		0.892289		0.791461
	0.1411			0.954697		0.91234		0.851449		0.892365		0.791619
	0.1412			0.954729		0.912405		0.851561		0.892449		0.791778
	0.1413			0.954761		0.91247		0.851672		0.892528		0.791941
	0.1414			0.954792		0.912532		0.851784		0.892609		0.7921
	0.1415			0.954824		0.912596		0.851882		0.892696		0.792256
	0.1416			0.954856		0.912663		0.851989		0.892773		0.792411
	0.1417			0.954886		0.912728		0.852097		0.892846		0.792563
	0.1418			0.954916		0.912791		0.852211		0.892922		0.792723
	0.1419			0.954946		0.912853		0.852322		0.892998		0.792884
	0.142			0.954975		0.912916		0.852436		0.893071		0.793047
	0.1421			0.955005		0.912979		0.852554		0.893146		0.793205
	0.1422			0.955035		0.913044		0.852668		0.893218		0.793364
	0.1423			0.955066		0.913107		0.852788		0.893292		0.793524
	0.1424			0.955097		0.913172		0.852897		0.893363		0.793683
	0.1425			0.955128		0.913236		0.853002		0.893437		0.793841
	0.1426			0.955158		0.913299		0.853109		0.893508		0.793996
	0.1427			0.955188		0.913363		0.853209		0.893578		0.794156
	0.1428			0.955218		0.91343		0.853316		0.893647		0.794311
	0.1429			0.955247		0.913496		0.853425		0.893718		0.79447
	0.143			0.955276		0.91356		0.853534		0.893786		0.794626
	0.1431			0.955307		0.913624		0.853639		0.893853		0.794783
	0.1432			0.955338		0.913687		0.853755		0.893923		0.794936
	0.1433			0.955369		0.913751		0.853869		0.893993		0.79509
	0.1434			0.9554		0.913817		0.853985		0.894062		0.795243
	0.1435			0.955432		0.913883		0.854103		0.894131		0.795399
	0.1436			0.955462		0.913944		0.854201		0.894201		0.795555
	0.1437			0.955492		0.914007		0.854303		0.894267		0.795704
	0.1438			0.955523		0.914071		0.854399		0.894329		0.795855
	0.1439			0.955555		0.914134		0.854503		0.894394		0.796009
	0.144			0.955585		0.914199		0.854593		0.894463		0.796163
	0.1441			0.955615		0.914263		0.854691		0.894534		0.796312
	0.1442			0.955645		0.914325		0.854791		0.894601		0.796461
	0.1443			0.955676		0.914389		0.854883		0.894669		0.796602
	0.1444			0.955705		0.914454		0.854972		0.894736		0.796746
	0.1445			0.955735		0.914516		0.855062		0.894807		0.796889
	0.1446			0.955766		0.914581		0.855157		0.894881		0.797029
	0.1447			0.955796		0.914643		0.855261		0.894956		0.797167
	0.1448			0.955828		0.914707		0.855366		0.89503		0.797306
	0.1449			0.955858		0.91477		0.855466		0.895104		0.797447
	0.145			0.955887		0.914836		0.85557		0.895176		0.797593
	0.1451			0.955916		0.9149		0.855676		0.895246		0.797732
	0.1452			0.955946		0.914964		0.855775		0.895324		0.797871
	0.1453			0.955974		0.91503		0.855862		0.895401		0.798016
	0.1454			0.956004		0.915096		0.855951		0.895476		0.798159
	0.1455			0.956033		0.91516		0.856035		0.895551		0.798301
	0.1456			0.956062		0.915217		0.856135		0.895624		0.798445
	0.1457			0.956091		0.915278		0.856225		0.895695		0.798588
	0.1458			0.956121		0.915344		0.856309		0.895771		0.798728
	0.1459			0.956151		0.915407		0.856406		0.895849		0.79887
	0.146			0.956179		0.915467		0.856499		0.895927		0.79902
	0.1461			0.956207		0.91553		0.856589		0.896002		0.799171
	0.1462			0.956239		0.915595		0.856674		0.896078		0.799316
	0.1463			0.95627		0.915657		0.856766		0.896157		0.799459
	0.1464			0.956299		0.915717		0.856853		0.896234		0.799608
	0.1465			0.956327		0.915778		0.856953		0.896309		0.799756
	0.1466			0.956357		0.915838		0.857056		0.896385		0.799904
	0.1467			0.956386		0.915903		0.857162		0.89646		0.800054
	0.1468			0.956417		0.915965		0.85727		0.896529		0.8002
	0.1469			0.956446		0.916028		0.857372		0.896597		0.800346
	0.147			0.956474		0.916091		0.857467		0.896671		0.8005
	0.1471			0.956505		0.916156		0.857567		0.896744		0.800654
	0.1472			0.956535		0.916219		0.857661		0.896813		0.800806
	0.1473			0.956565		0.916282		0.857757		0.896879		0.800959
	0.1474			0.956593		0.916343		0.857854		0.896949		0.80111
	0.1475			0.956622		0.916401		0.857957		0.897025		0.80126
	0.1476			0.95665		0.916459		0.85806		0.897098		0.801416
	0.1477			0.95668		0.916519		0.858151		0.897167		0.801565
	0.1478			0.956709		0.916583		0.858237		0.897236		0.801713
	0.1479			0.956738		0.916647		0.858326		0.89731		0.801859
	0.148			0.956767		0.916711		0.85842		0.897387		0.802001
	0.1481			0.956795		0.916777		0.858507		0.897456		0.802146
	0.1482			0.956823		0.916844		0.858606		0.897528		0.802298
	0.1483			0.956852		0.916907		0.858706		0.897602		0.802442
	0.1484			0.956881		0.916969		0.858811		0.897671		0.802584
	0.1485			0.956909		0.917034		0.858912		0.89774		0.80273
	0.1486			0.956937		0.917098		0.859005		0.897814		0.80287
	0.1487			0.956964		0.917162		0.859089		0.897887		0.803015
	0.1488			0.956991		0.917227		0.859185		0.897963		0.803158
	0.1489			0.957019		0.917291		0.859286		0.898039		0.803296
	0.149			0.957048		0.917354		0.85939		0.898113		0.80344
	0.1491			0.957076		0.917419		0.859492		0.898187		0.803582
	0.1492			0.957103		0.917481		0.859602		0.898263		0.803725
	0.1493			0.957131		0.917542		0.859718		0.898336		0.803864
	0.1494			0.95716		0.917603		0.859831		0.89841		0.804004
	0.1495			0.957189		0.917664		0.859935		0.898479		0.804147
	0.1496			0.957217		0.917723		0.860025		0.898552		0.804286
	0.1497			0.957245		0.917781		0.860118		0.898626		0.804422
	0.1498			0.957274		0.91784		0.860218		0.898698		0.80456
	0.1499			0.957302		0.917898		0.860322		0.898771		0.804697
	0.15			0.957332		0.917957		0.860421		0.898842		0.80483
	0.1501			0.957362		0.918016		0.860524		0.898913		0.804966
	0.1502			0.95739		0.918077		0.860629		0.898986		0.8051
	0.1503			0.957419		0.918133		0.860735		0.899061		0.805241
	0.1504			0.957449		0.918193		0.860839		0.899139		0.805383
	0.1505			0.957479		0.918253		0.860946		0.899213		0.805519
	0.1506			0.957508		0.918317		0.861057		0.899286		0.805657
	0.1507			0.957538		0.918381		0.861165		0.899359		0.805793
	0.1508			0.957566		0.918444		0.86128		0.899434		0.805935
	0.1509			0.957595		0.918507		0.861392		0.899507		0.806076
	0.151			0.957625		0.918569		0.861492		0.899579		0.806216
	0.1511			0.957655		0.91863		0.86159		0.899655		0.806363
	0.1512			0.957683		0.918691		0.861691		0.899727		0.806509
	0.1513			0.95771		0.918754		0.861799		0.899799		0.806648
	0.1514			0.957741		0.918817		0.861904		0.899871		0.80679
	0.1515			0.957772		0.918878		0.861997		0.899945		0.806935
	0.1516			0.9578		0.918941		0.862093		0.900019		0.807082
	0.1517			0.957829		0.919005		0.86219		0.900093		0.807219
	0.1518			0.957859		0.919068		0.862295		0.90017		0.807366
	0.1519			0.957888		0.91913		0.862387		0.900245		0.807515
	0.152			0.957916		0.919192		0.862476		0.900319		0.807661
	0.1521			0.957944		0.919254		0.862564		0.900393		0.807805
	0.1522			0.957974		0.919319		0.862656		0.900469		0.807946
	0.1523			0.958003		0.919382		0.862752		0.900542		0.808086
	0.1524			0.958033		0.919444		0.86284		0.900615		0.808224
	0.1525			0.958062		0.919506		0.862936		0.900692		0.808371
	0.1526			0.958091		0.919569		0.863024		0.900775		0.808517
	0.1527			0.958121		0.919632		0.863118		0.900848		0.80866
	0.1528			0.95815		0.919694		0.863212		0.900919		0.808799
	0.1529			0.958181		0.919756		0.8633		0.900992		0.808938
	0.153			0.95821		0.919818		0.863394		0.901068		0.809077
	0.1531			0.958239		0.919881		0.863486		0.901146		0.809214
	0.1532			0.958268		0.919945		0.863572		0.901219		0.809349
	0.1533			0.958297		0.920006		0.863658		0.901293		0.809485
	0.1534			0.958327		0.920066		0.863753		0.901373		0.809622
	0.1535			0.958357		0.920126		0.863844		0.901448		0.809759
	0.1536			0.958387		0.920184		0.863931		0.90152		0.809892
	0.1537			0.958416		0.920244		0.864017		0.901593		0.810026
	0.1538			0.958445		0.920303		0.864109		0.901667		0.810158
	0.1539			0.958475		0.920362		0.864197		0.901735		0.810286
	0.154			0.958504		0.920423		0.864283		0.901804		0.810413
	0.1541			0.958533		0.920483		0.864372		0.901877		0.810539
	0.1542			0.958562		0.920542		0.864463		0.901945		0.810666
	0.1543			0.958591		0.920605		0.864551		0.902013		0.810793
	0.1544			0.958619		0.920668		0.864625		0.902089		0.810918
	0.1545			0.958647		0.920732		0.864708		0.90216		0.811043
	0.1546			0.958676		0.920795		0.864795		0.902228		0.811173
	0.1547			0.958704		0.920856		0.864872		0.902293		0.811302
	0.1548			0.958731		0.920918		0.864962		0.902361		0.81143
	0.1549			0.958759		0.920978		0.86505		0.902428		0.811555
	0.155			0.958787		0.921041		0.86512		0.902492		0.811686
	0.1551			0.958813		0.921103		0.865209		0.902556		0.811814
	0.1552			0.95884		0.921166		0.865295		0.90262		0.81194
	0.1553			0.958869		0.92123		0.865384		0.902683		0.812066
	0.1554			0.958897		0.921292		0.865473		0.902748		0.812197
	0.1555			0.958924		0.921351		0.865559		0.902813		0.81233
	0.1556			0.958952		0.921412		0.86565		0.902876		0.812462
	0.1557			0.958979		0.921471		0.865744		0.902943		0.812589
	0.1558			0.959006		0.921526		0.865839		0.903006		0.812724
	0.1559			0.959034		0.921584		0.865935		0.90307		0.812856
	0.156			0.959062		0.921642		0.866029		0.903138		0.812985
	0.1561			0.959089		0.921698		0.866116		0.903198		0.813117
	0.1562			0.959116		0.921756		0.866208		0.90326		0.813249
	0.1563			0.959144		0.921818		0.86631		0.903327		0.813383
	0.1564			0.959172		0.921877		0.866402		0.903394		0.813516
	0.1565			0.9592		0.921934		0.866492		0.90346		0.813648
	0.1566			0.959229		0.921991		0.866578		0.903524		0.813781
	0.1567			0.959256		0.92205		0.866671		0.90359		0.813916
	0.1568			0.959283		0.92211		0.866751		0.903657		0.81405
	0.1569			0.95931		0.922168		0.866845		0.903723		0.81418
	0.157			0.959336		0.922228		0.866941		0.903791		0.814311
	0.1571			0.959363		0.922288		0.867039		0.903862		0.814448
	0.1572			0.959388		0.922347		0.867134		0.903931		0.814572
	0.1573			0.959416		0.92241		0.86723		0.904001		0.814709
	0.1574			0.959444		0.922472		0.86733		0.904067		0.814845
	0.1575			0.959471		0.922533		0.867436		0.904129		0.814981
	0.1576			0.959496		0.922592		0.867534		0.904197		0.815113
	0.1577			0.959523		0.922652		0.867633		0.904266		0.815236
	0.1578			0.959551		0.922714		0.867737		0.904333		0.815359
	0.1579			0.959579		0.922775		0.867845		0.904399		0.815489
	0.158			0.959605		0.922837		0.867933		0.904469		0.815614
	0.1581			0.959634		0.9229		0.868027		0.904539		0.815742
	0.1582			0.959662		0.922961		0.86813		0.904608		0.815877
	0.1583			0.959688		0.923021		0.868223		0.904682		0.816008
	0.1584			0.959716		0.923086		0.868323		0.904755		0.816138
	0.1585			0.959744		0.923149		0.868411		0.904822		0.816267
	0.1586			0.959772		0.923211		0.868505		0.904892		0.816398
	0.1587			0.959799		0.923275		0.868603		0.904962		0.816527
	0.1588			0.959828		0.923335		0.8687		0.905032		0.81666
	0.1589			0.959856		0.923396		0.868791		0.905105		0.816793
	0.159			0.959885		0.923459		0.868885		0.905176		0.816932
	0.1591			0.959913		0.923525		0.868978		0.905247		0.817071
	0.1592			0.959941		0.923587		0.869065		0.905322		0.817201
	0.1593			0.95997		0.923646		0.86915		0.905399		0.817333
	0.1594			0.959997		0.923708		0.869244		0.905474		0.817464
	0.1595			0.960024		0.923773		0.869341		0.905549		0.817594
	0.1596			0.96005		0.923834		0.869438		0.905621		0.81773
	0.1597			0.960078		0.923891		0.86953		0.905699		0.817866
	0.1598			0.960104		0.92395		0.869606		0.905776		0.818002
	0.1599			0.96013		0.92401		0.86969		0.905852		0.818139
	0.16			0.960157		0.92407		0.869786		0.905926		0.818274
	0.1601			0.960183		0.924128		0.869875		0.906001		0.818407
	0.1602			0.960209		0.924187		0.869964		0.906075		0.818545
	0.1603			0.960237		0.924242		0.870057		0.906144		0.818685
	0.1604			0.960264		0.924299		0.870144		0.906215		0.818824
	0.1605			0.96029		0.924357		0.870231		0.906285		0.818963
	0.1606			0.960317		0.924413		0.870309		0.90636		0.819105
	0.1607			0.960343		0.924469		0.870401		0.906438		0.819244
	0.1608			0.960371		0.924525		0.870494		0.906513		0.819382
	0.1609			0.9604		0.924582		0.870581		0.906586		0.81952
	0.161			0.960427		0.92464		0.870666		0.90666		0.819659
	0.1611			0.960453		0.924697		0.870758		0.906737		0.819793
	0.1612			0.960481		0.924752		0.870845		0.906816		0.819926
	0.1613			0.960508		0.924805		0.87093		0.906895		0.820063
	0.1614			0.960534		0.92486		0.871007		0.906972		0.820195
	0.1615			0.96056		0.924918		0.87108		0.907047		0.820327
	0.1616			0.960588		0.924974		0.87115		0.907126		0.820464
	0.1617			0.960614		0.92503		0.871233		0.907203		0.820603
	0.1618			0.96064		0.925086		0.871319		0.907277		0.820737
	0.1619			0.960667		0.925142		0.871405		0.907353		0.820873
	0.162			0.960693		0.9252		0.871479		0.90743		0.821012
	0.1621			0.960719		0.925257		0.871566		0.907513		0.821154
	0.1622			0.960745		0.925315		0.871651		0.907591		0.821287
	0.1623			0.96077		0.925372		0.871737		0.907667		0.821428
	0.1624			0.960797		0.925429		0.87182		0.907745		0.821568
	0.1625			0.960824		0.925485		0.871919		0.907821		0.821704
	0.1626			0.960851		0.92554		0.872012		0.907895		0.821846
	0.1627			0.960879		0.925599		0.872106		0.907968		0.821989
	0.1628			0.960905		0.925658		0.872202		0.908048		0.822129
	0.1629			0.960933		0.925715		0.872298		0.908125		0.82227
	0.163			0.96096		0.925768		0.872385		0.908199		0.822405
	0.1631			0.960985		0.925823		0.872472		0.908281		0.822542
	0.1632			0.961012		0.925879		0.872567		0.908364		0.822679
	0.1633			0.961039		0.925932		0.872657		0.908443		0.822818
	0.1634			0.961064		0.925986		0.872754		0.90852		0.822953
	0.1635			0.961091		0.926042		0.872857		0.908599		0.823087
	0.1636			0.961118		0.926097		0.872956		0.908676		0.823223
	0.1637			0.961144		0.92615		0.873054		0.908757		0.823358
	0.1638			0.96117		0.926205		0.873148		0.908835		0.823491
	0.1639			0.961195		0.926261		0.873251		0.908906		0.823622
	0.164			0.961219		0.926316		0.873336		0.908983		0.823764
	0.1641			0.961244		0.92637		0.873432		0.909065		0.823901
	0.1642			0.961272		0.926426		0.873526		0.909143		0.824038
	0.1643			0.961297		0.926479		0.873619		0.909215		0.824179
	0.1644			0.961322		0.926531		0.873706		0.909287		0.824317
	0.1645			0.961348		0.926583		0.873792		0.909359		0.824451
	0.1646			0.961375		0.926634		0.873884		0.909432		0.824586
	0.1647			0.961402		0.926685		0.873981		0.909509		0.824724
	0.1648			0.961428		0.926735		0.874084		0.90958		0.824863
	0.1649			0.961453		0.926786		0.874193		0.90965		0.825004
	0.165			0.961479		0.926837		0.8743		0.909717		0.825146
	0.1651			0.961507		0.926886		0.874391		0.909786		0.825283
	0.1652			0.961533		0.926935		0.874491		0.90985		0.825418
	0.1653			0.961559		0.926985		0.874593		0.909916		0.825552
	0.1654			0.961587		0.927036		0.874696		0.909983		0.825687
	0.1655			0.961614		0.927088		0.874801		0.910055		0.825821
	0.1656			0.961641		0.927142		0.874892		0.910126		0.825955
	0.1657			0.961667		0.927196		0.874985		0.910194		0.826088
	0.1658			0.961691		0.92725		0.875082		0.910265		0.826214
	0.1659			0.961718		0.927302		0.875179		0.910335		0.826346
	0.166			0.961745		0.927355		0.875274		0.910404		0.82648
	0.1661			0.961771		0.927406		0.875363		0.91047		0.826612
	0.1662			0.961797		0.927458		0.875448		0.91054		0.826749
	0.1663			0.961822		0.92751		0.875532		0.910614		0.826885
	0.1664			0.961849		0.927562		0.875614		0.910683		0.827023
	0.1665			0.961877		0.927612		0.875696		0.91075		0.827154
	0.1666			0.961904		0.92766		0.875788		0.910819		0.827285
	0.1667			0.961933		0.927708		0.875888		0.910888		0.827422
	0.1668			0.96196		0.927759		0.875973		0.910957		0.827558
	0.1669			0.961986		0.92781		0.876071		0.911026		0.82769
	0.167			0.962012		0.927861		0.876163		0.911097		0.827824
	0.1671			0.962038		0.927914		0.876254		0.911169		0.827961
	0.1672			0.962064		0.927964		0.876355		0.911237		0.828094
	0.1673			0.962091		0.928014		0.876456		0.911303		0.828228
	0.1674			0.962119		0.928066		0.87656		0.911375		0.828359
	0.1675			0.962143		0.928115		0.876653		0.911445		0.828486
	0.1676			0.962169		0.928164		0.876744		0.911516		0.828616
	0.1677			0.962196		0.928212		0.876834		0.911583		0.828748
	0.1678			0.962222		0.928262		0.876923		0.91165		0.828879
	0.1679			0.962248		0.928312		0.877003		0.911715		0.829015
	0.168			0.962274		0.928361		0.877082		0.911781		0.829149
	0.1681			0.962298		0.928413		0.87717		0.911848		0.82928
	0.1682			0.962323		0.928465		0.877269		0.911913		0.829406
	0.1683			0.962348		0.928517		0.877361		0.911976		0.82953
	0.1684			0.962372		0.928567		0.877444		0.912044		0.829658
	0.1685			0.962398		0.928618		0.877521		0.912117		0.829788
	0.1686			0.962423		0.928673		0.877611		0.912183		0.829918
	0.1687			0.962447		0.928725		0.8777		0.912252		0.830046
	0.1688			0.962472		0.928777		0.877781		0.912322		0.830174
	0.1689			0.962497		0.928827		0.877866		0.912388		0.830299
	0.169			0.962523		0.928877		0.877952		0.91245		0.830428
	0.1691			0.962548		0.928926		0.878045		0.912516		0.830556
	0.1692			0.962573		0.928974		0.878119		0.91258		0.830678
	0.1693			0.962597		0.929021		0.878201		0.912645		0.830803
	0.1694			0.962623		0.929071		0.878289		0.912707		0.830928
	0.1695			0.962646		0.92912		0.878372		0.912767		0.83105
	0.1696			0.962671		0.929168		0.878459		0.912831		0.831174
	0.1697			0.962695		0.929215		0.878552		0.912898		0.831302
	0.1698			0.96272		0.929267		0.878635		0.912959		0.831433
	0.1699			0.962747		0.92932		0.878725		0.913021		0.831559
	0.17			0.962774		0.929374		0.878817		0.913084		0.831688
	0.1701			0.962799		0.929428		0.878911		0.913142		0.831815
	0.1702			0.962821		0.929479		0.87901		0.913207		0.83194
	0.1703			0.962846		0.929531		0.879102		0.913272		0.832062
	0.1704			0.962871		0.929582		0.879205		0.913337		0.83219
	0.1705			0.962897		0.929635		0.879299		0.913401		0.832319
	0.1706			0.962921		0.929689		0.879399		0.913464		0.832445
	0.1707			0.962945		0.929743		0.879491		0.913527		0.832562
	0.1708			0.962969		0.929794		0.879579		0.913593		0.83268
	0.1709			0.962993		0.929848		0.879664		0.913665		0.832803
	0.171			0.963016		0.9299		0.879744		0.913734		0.832927
	0.1711			0.963039		0.929951		0.879832		0.9138		0.833048
	0.1712			0.963063		0.930006		0.879912		0.913861		0.83317
	0.1713			0.963088		0.930064		0.880002		0.913921		0.833293
	0.1714			0.963114		0.93012		0.880084		0.913983		0.833413
	0.1715			0.96314		0.930172		0.880172		0.91405		0.833536
	0.1716			0.963165		0.930226		0.880248		0.914118		0.833658
	0.1717			0.963189		0.930282		0.880327		0.914184		0.833776
	0.1718			0.963212		0.930336		0.880411		0.914246		0.833899
	0.1719			0.963237		0.93039		0.880487		0.914308		0.834023
	0.172			0.963262		0.930444		0.880567		0.914374		0.834145
	0.1721			0.963288		0.930495		0.880648		0.914442		0.834266
	0.1722			0.963313		0.930546		0.880728		0.914509		0.834392
	0.1723			0.963338		0.9306		0.880811		0.91457		0.834519
	0.1724			0.963363		0.930654		0.880877		0.91463		0.834646
	0.1725			0.963387		0.930708		0.880958		0.9147		0.834775
	0.1726			0.963411		0.930762		0.881037		0.914764		0.834899
	0.1727			0.963434		0.930813		0.881109		0.914827		0.835027
	0.1728			0.963457		0.930866		0.881187		0.914896		0.835154
	0.1729			0.96348		0.93092		0.881262		0.914963		0.835277
	0.173			0.963504		0.930973		0.88134		0.915032		0.8354
	0.1731			0.963527		0.931027		0.881421		0.915096		0.835524
	0.1732			0.963551		0.93108		0.881501		0.915157		0.835649
	0.1733			0.963576		0.93113		0.881581		0.915228		0.835774
	0.1734			0.963601		0.93118		0.881657		0.91529		0.835894
	0.1735			0.963627		0.931232		0.881735		0.915353		0.836017
	0.1736			0.963653		0.931284		0.88181		0.915416		0.836143
	0.1737			0.963679		0.931335		0.881889		0.915478		0.836267
	0.1738			0.963705		0.931388		0.88197		0.915546		0.836384
	0.1739			0.96373		0.931441		0.882039		0.915613		0.836507
	0.174			0.963755		0.931494		0.882114		0.91568		0.836629
	0.1741			0.96378		0.931545		0.882184		0.915748		0.836754
	0.1742			0.963804		0.931597		0.882261		0.915811		0.836883
	0.1743			0.96383		0.931651		0.882335		0.915874		0.837007
	0.1744			0.963855		0.931708		0.882411		0.915933		0.837131
	0.1745			0.96388		0.931761		0.882488		0.915993		0.837254
	0.1746			0.963905		0.931812		0.882568		0.91605		0.837376
	0.1747			0.963929		0.931865		0.882646		0.916108		0.8375
	0.1748			0.963954		0.931918		0.882729		0.916168		0.837632
	0.1749			0.963978		0.931971		0.882812		0.916227		0.837756
	0.175			0.964003		0.932025		0.882889		0.916289		0.837879
	0.1751			0.964027		0.932079		0.882961		0.916344		0.838005
	0.1752			0.964051		0.932133		0.883031		0.916402		0.838126
	0.1753			0.964076		0.932185		0.883109		0.916461		0.838246
	0.1754			0.9641		0.932237		0.88318		0.916514		0.838365
	0.1755			0.964124		0.932294		0.883243		0.916574		0.838487
	0.1756			0.964149		0.93235		0.883318		0.916633		0.838609
	0.1757			0.964176		0.932406		0.883399		0.916696		0.838731
	0.1758			0.964201		0.932463		0.883469		0.916759		0.838851
	0.1759			0.964224		0.932521		0.883538		0.916815		0.838973
	0.176			0.964249		0.932578		0.8836		0.916874		0.839098
	0.1761			0.964275		0.932631		0.883665		0.916934		0.839224
	0.1762			0.964301		0.932683		0.883743		0.916991		0.839352
	0.1763			0.964326		0.932736		0.883831		0.917052		0.839472
	0.1764			0.964352		0.932791		0.883912		0.917113		0.839599
	0.1765			0.964378		0.932844		0.883992		0.917174		0.839723
	0.1766			0.964404		0.932896		0.884066		0.917235		0.839851
	0.1767			0.96443		0.932952		0.884139		0.917297		0.83998
	0.1768			0.964456		0.933006		0.884211		0.917356		0.84011
	0.1769			0.964481		0.933057		0.884275		0.917416		0.840237
	0.177			0.964507		0.933109		0.884336		0.917472		0.840359
	0.1771			0.964531		0.933159		0.884414		0.917534		0.840487
	0.1772			0.964557		0.933208		0.884487		0.917591		0.840617
	0.1773			0.964581		0.933258		0.884557		0.917651		0.84074
	0.1774			0.964605		0.933308		0.884631		0.917709		0.840869
	0.1775			0.964631		0.933358		0.884702		0.91777		0.840995
	0.1776			0.964656		0.933412		0.884771		0.917825		0.841122
	0.1777			0.964681		0.93346		0.884846		0.91788		0.841244
	0.1778			0.964704		0.933509		0.884911		0.917939		0.841361
	0.1779			0.964727		0.933561		0.884985		0.917998		0.841484
	0.178			0.964752		0.933611		0.885063		0.918054		0.841607
	0.1781			0.964777		0.933663		0.885135		0.918108		0.841728
	0.1782			0.9648		0.933719		0.8852		0.918165		0.841847
	0.1783			0.964825		0.933769		0.885275		0.918219		0.841969
	0.1784			0.964849		0.933819		0.885344		0.918271		0.84209
	0.1785			0.964874		0.933869		0.885416		0.918331		0.842208
	0.1786			0.964898		0.933917		0.885501		0.918389		0.842324
	0.1787			0.964923		0.933967		0.885579		0.918446		0.842444
	0.1788			0.964947		0.934019		0.885664		0.918503		0.842566
	0.1789			0.964971		0.934069		0.885755		0.918564		0.842688
	0.179			0.964995		0.934116		0.885835		0.918622		0.842807
	0.1791			0.965018		0.934163		0.885911		0.918681		0.842922
	0.1792			0.965044		0.93421		0.885991		0.918742		0.843036
	0.1793			0.965071		0.934255		0.886067		0.918802		0.843156
	0.1794			0.965097		0.934299		0.886144		0.918864		0.843274
	0.1795			0.965121		0.934347		0.886217		0.918918		0.843391
	0.1796			0.965146		0.934396		0.886298		0.918978		0.843514
	0.1797			0.965172		0.934446		0.886375		0.919037		0.84363
	0.1798			0.965198		0.934494		0.88645		0.919097		0.843748
	0.1799			0.965224		0.934543		0.88653		0.919153		0.843864
	0.18			0.965251		0.934594		0.886609		0.919211		0.843984
	0.1801			0.965275		0.934643		0.886682		0.919265		0.844103
	0.1802			0.965299		0.934695		0.886755		0.919324		0.844221
	0.1803			0.965324		0.934745		0.886818		0.919385		0.844338
	0.1804			0.965349		0.934796		0.886886		0.919446		0.844456
	0.1805			0.965375		0.934848		0.886966		0.919512		0.844578
	0.1806			0.965401		0.934898		0.887043		0.919578		0.844699
	0.1807			0.965424		0.934951		0.887112		0.91964		0.844816
	0.1808			0.965448		0.935004		0.887189		0.919696		0.844928
	0.1809			0.965473		0.935052		0.887262		0.919753		0.845043
	0.181			0.965498		0.935101		0.887338		0.919814		0.845155
	0.1811			0.965522		0.93515		0.887411		0.919879		0.845264
	0.1812			0.965546		0.9352		0.887482		0.919941		0.845373
	0.1813			0.965571		0.93525		0.88756		0.920002		0.845486
	0.1814			0.965596		0.9353		0.887638		0.920061		0.845602
	0.1815			0.96562		0.935349		0.887722		0.920114		0.845717
	0.1816			0.965644		0.935401		0.887799		0.920169		0.845831
	0.1817			0.965669		0.935454		0.887886		0.920233		0.845949
	0.1818			0.965692		0.935504		0.887979		0.920299		0.846065
	0.1819			0.965715		0.935556		0.888068		0.920362		0.846179
	0.182			0.965738		0.935609		0.88815		0.920424		0.846293
	0.1821			0.965763		0.935659		0.888244		0.920487		0.84641
	0.1822			0.965786		0.93571		0.888345		0.920548		0.846524
	0.1823			0.965811		0.935761		0.888437		0.920607		0.846637
	0.1824			0.965835		0.93581		0.888524		0.920666		0.846753
	0.1825			0.965858		0.935861		0.888612		0.920733		0.846869
	0.1826			0.96588		0.935913		0.888707		0.920796		0.846986
	0.1827			0.965904		0.935962		0.888798		0.920855		0.847102
	0.1828			0.965927		0.936012		0.888886		0.920915		0.847219
	0.1829			0.965951		0.936063		0.888973		0.92098		0.847342
	0.183			0.965974		0.936111		0.889062		0.921048		0.847462
	0.1831			0.965997		0.936161		0.889133		0.921109		0.847583
	0.1832			0.96602		0.936208		0.889208		0.921174		0.847701
	0.1833			0.966043		0.936254		0.889291		0.921236		0.847818
	0.1834			0.966065		0.9363		0.889373		0.921302		0.847933
	0.1835			0.966089		0.936347		0.889457		0.921369		0.848049
	0.1836			0.966114		0.936395		0.889528		0.92143		0.848159
	0.1837			0.966137		0.936441		0.889607		0.92149		0.848273
	0.1838			0.966161		0.93649		0.889678		0.921548		0.848392
	0.1839			0.966184		0.936538		0.889755		0.921606		0.848503
	0.184			0.966207		0.936586		0.889826		0.921668		0.848615
	0.1841			0.96623		0.936633		0.8899		0.921727		0.848723
	0.1842			0.966253		0.936681		0.88997		0.921781		0.848833
	0.1843			0.966276		0.936728		0.890039		0.921835		0.848939
	0.1844			0.9663		0.936776		0.890104		0.921891		0.849044
	0.1845			0.966324		0.936824		0.890174		0.921946		0.849154
	0.1846			0.966348		0.936874		0.890247		0.921999		0.849263
	0.1847			0.966371		0.936925		0.890322		0.922053		0.849368
	0.1848			0.966395		0.936975		0.890388		0.922105		0.84947
	0.1849			0.966419		0.937026		0.890453		0.922162		0.849582
	0.185			0.966443		0.937076		0.890516		0.922222		0.849687
	0.1851			0.966468		0.937125		0.890579		0.922281		0.849791
	0.1852			0.966492		0.937172		0.890643		0.922337		0.849889
	0.1853			0.966514		0.93722		0.890712		0.922397		0.849984
	0.1854			0.966539		0.937266		0.89078		0.922458		0.850081
	0.1855			0.966562		0.937313		0.890851		0.922514		0.850181
	0.1856			0.966587		0.937361		0.890918		0.922571		0.850283
	0.1857			0.96661		0.937409		0.890996		0.922629		0.850382
	0.1858			0.966632		0.937457		0.891052		0.922685		0.850483
	0.1859			0.966655		0.937506		0.891121		0.922744		0.850584
	0.186			0.966679		0.937552		0.891197		0.922801		0.850683
	0.1861			0.966701		0.937602		0.891281		0.922863		0.850789
	0.1862			0.966725		0.937651		0.891361		0.922922		0.850893
	0.1863			0.966747		0.937699		0.891437		0.922976		0.850993
	0.1864			0.966771		0.93775		0.891516		0.923029		0.851098
	0.1865			0.966794		0.937798		0.891582		0.923087		0.851201
	0.1866			0.966818		0.937847		0.891652		0.923142		0.851301
	0.1867			0.966841		0.937897		0.891726		0.923197		0.851399
	0.1868			0.966864		0.937945		0.891799		0.923254		0.851499
	0.1869			0.966888		0.937991		0.891872		0.923317		0.851606
	0.187			0.966911		0.938038		0.89194		0.923375		0.85171
	0.1871			0.966932		0.938089		0.892007		0.923429		0.851813
	0.1872			0.966953		0.93814		0.89207		0.923489		0.851915
	0.1873			0.966976		0.938189		0.89213		0.923551		0.852017
	0.1874			0.967		0.938237		0.892194		0.923611		0.852122
	0.1875			0.967025		0.938283		0.892255		0.923668		0.852223
	0.1876			0.967048		0.93833		0.892317		0.923726		0.852334
	0.1877			0.96707		0.938377		0.892384		0.923786		0.852446
	0.1878			0.967092		0.938426		0.89244		0.923843		0.852553
	0.1879			0.967114		0.938473		0.892498		0.923902		0.852658
	0.188			0.967136		0.938517		0.892563		0.923962		0.852764
	0.1881			0.967158		0.938566		0.892631		0.924021		0.852867
	0.1882			0.967177		0.938613		0.892693		0.924075		0.852972
	0.1883			0.967197		0.938661		0.892763		0.924135		0.853078
	0.1884			0.967219		0.938711		0.892828		0.924194		0.853182
	0.1885			0.96724		0.938758		0.892896		0.924251		0.85329
	0.1886			0.967261		0.938805		0.892955		0.924307		0.853401
	0.1887			0.967283		0.938852		0.893009		0.924366		0.853507
	0.1888			0.967303		0.938898		0.893072		0.924425		0.85361
	0.1889			0.967324		0.938946		0.893142		0.924477		0.853715
	0.189			0.967347		0.938993		0.893219		0.924534		0.853823
	0.1891			0.967368		0.939037		0.893297		0.924593		0.853934
	0.1892			0.967389		0.939084		0.893375		0.924653		0.85404
	0.1893			0.96741		0.93913		0.89346		0.924717		0.854144
	0.1894			0.967432		0.939175		0.893546		0.924778		0.854252
	0.1895			0.967453		0.939222		0.893633		0.924837		0.854359
	0.1896			0.967475		0.939271		0.893719		0.924896		0.854463
	0.1897			0.967497		0.939317		0.893801		0.924959		0.854562
	0.1898			0.96752		0.939366		0.893873		0.92502		0.854669
	0.1899			0.967542		0.939414		0.893948		0.925078		0.85478
	0.19			0.967564		0.939461		0.894032		0.925135		0.854885
	0.1901			0.967586		0.939507		0.894111		0.925192		0.854988
	0.1902			0.967609		0.939553		0.894186		0.925252		0.855088
	0.1903			0.967631		0.939604		0.894274		0.925311		0.855189
	0.1904			0.967653		0.939652		0.89435		0.925371		0.855297
	0.1905			0.967675		0.939697		0.894426		0.925427		0.855407
	0.1906			0.967697		0.939745		0.894512		0.925485		0.855513
	0.1907			0.967718		0.939794		0.894591		0.925543		0.855618
	0.1908			0.967741		0.939844		0.894662		0.925602		0.855723
	0.1909			0.967763		0.939894		0.894734		0.925664		0.855825
	0.191			0.967784		0.939944		0.894815		0.925722		0.855921
	0.1911			0.967805		0.939994		0.894888		0.925778		0.85602
	0.1912			0.967826		0.940042		0.894966		0.925831		0.856118
	0.1913			0.967849		0.94009		0.89504		0.925883		0.856215
	0.1914			0.96787		0.940138		0.895118		0.925944		0.856314
	0.1915			0.967891		0.940187		0.895199		0.926006		0.856409
	0.1916			0.967912		0.940236		0.895279		0.926064		0.856501
	0.1917			0.967934		0.940283		0.895357		0.926122		0.856595
	0.1918			0.967956		0.940326		0.895435		0.926178		0.856689
	0.1919			0.967978		0.940374		0.895504		0.926238		0.856792
	0.192			0.968001		0.940421		0.895585		0.926291		0.856892
	0.1921			0.968023		0.940468		0.895666		0.926343		0.856988
	0.1922			0.968047		0.940513		0.895737		0.926399		0.857086
	0.1923			0.96807		0.940562		0.895812		0.926448		0.857188
	0.1924			0.968094		0.940609		0.895892		0.926499		0.857285
	0.1925			0.968117		0.940652		0.895976		0.926556		0.857383
	0.1926			0.968141		0.940696		0.896054		0.926619		0.857485
	0.1927			0.968163		0.940741		0.896126		0.926678		0.857588
	0.1928			0.968187		0.940788		0.896205		0.926733		0.85769
	0.1929			0.96821		0.940832		0.896286		0.926782		0.857787
	0.193			0.968234		0.940876		0.896362		0.926839		0.857888
	0.1931			0.968258		0.940921		0.896438		0.926898		0.857989
	0.1932			0.96828		0.940966		0.896503		0.926951		0.85809
	0.1933			0.968303		0.94101		0.896569		0.927006		0.858194
	0.1934			0.968326		0.941053		0.89663		0.927061		0.858294
	0.1935			0.968349		0.941099		0.89669		0.927123		0.858393
	0.1936			0.968372		0.941145		0.896756		0.927185		0.858491
	0.1937			0.968395		0.941188		0.896818		0.927246		0.858592
	0.1938			0.968418		0.941231		0.896883		0.927306		0.858696
	0.1939			0.968442		0.941274		0.896946		0.927368		0.858793
	0.194			0.968466		0.941315		0.897004		0.92743		0.858889
	0.1941			0.968489		0.941358		0.897067		0.92749		0.858982
	0.1942			0.968512		0.9414		0.89713		0.927549		0.859075
	0.1943			0.968535		0.941443		0.897184		0.927607		0.859171
	0.1944			0.968557		0.941487		0.897248		0.927657		0.859267
	0.1945			0.96858		0.94153		0.897316		0.927713		0.859361
	0.1946			0.968603		0.941573		0.897377		0.92777		0.859456
	0.1947			0.968627		0.941618		0.897436		0.927827		0.859552
	0.1948			0.968648		0.941662		0.897492		0.927878		0.859654
	0.1949			0.968668		0.941706		0.897541		0.927933		0.859755
	0.195			0.968691		0.941755		0.897601		0.92799		0.859849
	0.1951			0.968715		0.9418		0.897669		0.92805		0.859943
	0.1952			0.968737		0.941843		0.897741		0.928108		0.86004
	0.1953			0.968759		0.941884		0.897805		0.92816		0.860139
	0.1954			0.968781		0.941925		0.897869		0.928214		0.860241
	0.1955			0.968804		0.941968		0.897927		0.928276		0.860344
	0.1956			0.968825		0.94201		0.897988		0.928333		0.860441
	0.1957			0.968847		0.942054		0.898066		0.928391		0.860539
	0.1958			0.96887		0.9421		0.898138		0.928449		0.860639
	0.1959			0.968893		0.942144		0.898198		0.928502		0.860741
	0.196			0.968915		0.94219		0.898266		0.928557		0.860844
	0.1961			0.968936		0.942234		0.898323		0.928612		0.860941
	0.1962			0.968959		0.942277		0.898399		0.928665		0.861035
	0.1963			0.968981		0.942322		0.898481		0.928719		0.861128
	0.1964			0.969004		0.942366		0.898551		0.928772		0.861226
	0.1965			0.969027		0.942411		0.898609		0.928822		0.861326
	0.1966			0.969052		0.942455		0.898662		0.928872		0.861429
	0.1967			0.969075		0.942499		0.898728		0.928922		0.861533
	0.1968			0.969097		0.942542		0.898794		0.928978		0.861636
	0.1969			0.969121		0.942587		0.898864		0.929032		0.861739
	0.197			0.969144		0.942632		0.898927		0.929084		0.861846
	0.1971			0.969166		0.942675		0.898991		0.929136		0.861952
	0.1972			0.969188		0.942717		0.899061		0.929191		0.862055
	0.1973			0.969211		0.942761		0.899138		0.929247		0.862155
	0.1974			0.969232		0.942807		0.899203		0.929299		0.862256
	0.1975			0.969256		0.942852		0.899273		0.929353		0.862362
	0.1976			0.96928		0.942898		0.89935		0.929408		0.862466
	0.1977			0.969303		0.942944		0.899428		0.929462		0.862565
	0.1978			0.969326		0.94299		0.899506		0.929514		0.862667
	0.1979			0.969347		0.943035		0.899581		0.929565		0.862767
	0.198			0.96937		0.943079		0.899652		0.929618		0.862863
	0.1981			0.969392		0.943125		0.899733		0.929675		0.862963
	0.1982			0.969413		0.943168		0.899811		0.929734		0.863069
	0.1983			0.969436		0.943212		0.899883		0.929791		0.863174
	0.1984			0.969458		0.943257		0.899952		0.929845		0.863276
	0.1985			0.969481		0.943302		0.900022		0.929902		0.863379
	0.1986			0.969505		0.943347		0.900093		0.92996		0.863479
	0.1987			0.969527		0.943395		0.900164		0.930014		0.863573
	0.1988			0.969548		0.943442		0.900239		0.930067		0.863668
	0.1989			0.969568		0.943485		0.90031		0.930121		0.863766
	0.199			0.96959		0.943531		0.900378		0.930179		0.863867
	0.1991			0.969612		0.943576		0.900441		0.93023		0.863964
	0.1992			0.969635		0.943621		0.900497		0.930284		0.864062
	0.1993			0.969658		0.943665		0.90056		0.930341		0.864164
	0.1994			0.969681		0.94371		0.900624		0.930397		0.864262
	0.1995			0.969703		0.943754		0.90069		0.930451		0.864362
	0.1996			0.969724		0.943801		0.900752		0.930508		0.864464
	0.1997			0.969745		0.943847		0.900817		0.930565		0.86456
[truncated: 3,413 more rows]

## Sheet: Figure 3D
Table 1: Quantification of the neurotransmitter release parameters in STX1-null neurons lentivirally transdicuced with STX2-STX1A chimeras
Parameter measured	Statistical test	Genotype	Number of independent cultures	Number of observations	Parametric distribution 'D'Agostino & Pearson test'	Mean	SEM	Minimum	25% Percentile	Median	75% Percentile	Maximum	Mean ranks	Adjusted p-value (vs STX2-WT)
EPSC half width (ms)	Kruskal-Wallis; Dunn's post-hoc	STX2	12	91	Yes	11.98	0.6179	0.3892	7.606	11.65	14.45	28.95	223.2
		STX2-1A(SNARE)	5	46	No	7.27	0.2384	4.786	6.275	7.051	8.331	12.12	157.4	0.008
		STX2-1A(Nter)	5	37	No	11.31	0.5225	5.658	8.442	12.18	13.45	18.37	240.1	>0.999
		STX2-1A(Cter)	5	35	Yes	7.318	0.2983	3.884	6.269	7.389	8.352	11.48	157.7	0.0034
		STX1A	12	109	Yes	5.314	0.1225	3.294	4.476	4.993	5.899	9.684	80.39	<0.0001

## Sheet: Figure 3E
Table 1: Quantification of the neurotransmitter release parameters in STX1-null neurons lentivirally transdicuced with STX2-STX1A chimeras
Parameter measured	Statistical test	Genotype	Number of independent cultures	Number of observations	Parametric distribution 'D'Agostino & Pearson test'	Mean	SEM	Minimum	25% Percentile	Median	75% Percentile	Maximum	Mean ranks	Adjusted p-value (vs STX2-WT)
mEPSC frequency (Hz)	Kruskal-Wallis; Dunn's post-hoc	STX2	12	106	No	13.12	0.7523	0.04167	5.749	13.9	19.22	29.13	205.5
		STX2-1A(SNARE)	5	49	Yes	18.24	1.022	2.688	13.8	18.44	24.61	31.1	258.8	0.0248
		STX2-1A(Nter)	5	47	Yes	18.77	0.9901	1.38	15.08	19.25	23.88	30.6	262.8	0.0134
		STX2-1A(Cter)	5	48	No	5.644	1.052	0.17	1.26	2.875	6.043	30.4	108.8	<0.0001
		STX1A	12	123	No	4.8	0.5318	0.08333	1.297	2.823	5.883	33.83	101.7	<0.0001

## Sheet: Figure 3F
Table 1: Quantification of the neurotransmitter release parameters in STX1-null neurons lentivirally transdicuced with STX2-STX1A chimeras
Parameter measured	Statistical test	Genotype	Number of independent cultures	Number of observations	Parametric distribution 'D'Agostino & Pearson test'	Mean	SEM	Minimum	25% Percentile	Median	75% Percentile	Maximum	Mean ranks	Adjusted p-value (vs STX2-WT)
RRP (nc)	Kruskal-Wallis; Dunn's post-hoc	STX2	12	90	No	0.08044	0.007509	0.001347	0.02662	0.06097	0.1051	0.3514	126.4
		STX2-1A(SNARE)	5	40	Yes	0.1327	0.01784	0.00308	0.02879	0.1088	0.204	0.4279	164.9	0.3819
		STX2-1A(Nter)	5	49	No	0.06048	0.006218	7.643e-05	0.03	0.04735	0.08204	0.1924	110	>0.9999
		STX2-1A(Cter)	5	47	No	0.1277	0.02708	0.004463	0.03985	0.06645	0.1693	1.164	146.6	>0.9999
		STX1A	12	112	No	0.3599	0.03431	0.0006655	0.1178	0.231	0.4671	2.503	241.4	<0.0001

## Sheet: Figure 3G
Table 1: Quantification of the neurotransmitter release parameters in STX1-null neurons lentivirally transdicuced with STX2-STX1A chimeras
Parameter measured	Statistical test	Genotype	Number of independent cultures	Number of observations	Parametric distribution 'D'Agostino & Pearson test'	Mean	SEM	Minimum	25% Percentile	Median	75% Percentile	Maximum	Mean ranks	Adjusted p-value (vs STX2-WT)
PVR (%)	Kruskal-Wallis; Dunn's post-hoc	STX2	12	85	No	12.06	1.009	0.2919	4.757	9.32	18.16	49.7	144.7
		STX2-1A(SNARE)	5	33	Yes	26.9	3.035	0.8529	14.05	21.58	38.47	66.47	227.5	<0.0001
		STX2-1A(Nter)	5	47	No	20.86	1.99	0.9695	10.95	20.31	25.39	69.82	206.5	0.0019
		STX2-1A(Cter)	5	45	No	12.56	1.765	0.04057	4.311	9.145	18.52	52.75	141.7	>0.9999
		STX1A	12	109	No	10.83	0.9634	0.01845	4.853	7.965	11.98	57.88	129.4	>0.9999

## Sheet: Figure 3H
Table 1: Quantification of the neurotransmitter release parameters in STX1-null neurons lentivirally transdicuced with STX2-STX1A chimeras
Parameter measured	Statistical test	Genotype	Number of independent cultures	Number of observations	Parametric distribution 'D'Agostino & Pearson test'	Mean	SEM	Minimum	25% Percentile	Median	75% Percentile	Maximum	Mean ranks	Adjusted p-value (vs STX2-WT)
Spontaneous vesicular release rate (s-1)	Kruskal-Wallis; Dunn's post-hoc	STX2	12	63	No	0.02781	0.002987	0.0006267	0.01188	0.02036	0.03662	0.1219	154.8
		STX2-1A(SNARE)	5	28	No	0.02249	0.004694	0.0007979	0.00769	0.01323	0.0274	0.1178	141.5	>0.9999
		STX2-1A(Nter)	5	23	No	0.02656	0.0079	0.0009884	0.002124	0.01276	0.03654	0.1604	127.1	0.6557
		STX2-1A(Cter)	5	28	No	0.006656	0.001838	0.0002241	0.001712	0.003403	0.005332	0.04697	90.5	<0.0001
		STX1A	12	71	No	0.002453	0.0004704	4.512e-05	0.0007861	0.001114	0.002233	0.02666	51	<0.0001

## Sheet: Figure 3I
Table 1: Quantification of the neurotransmitter release parameters in STX1-null neurons lentivirally transdicuced with STX2-STX1A chimeras
Parameter measured	Statistical test	Genotype	Number of independent cultures	Number of observations	Parametric distribution 'D'Agostino & Pearson test'	Mean	SEM	Minimum	25% Percentile	Median	75% Percentile	Maximum	Mean ranks	Adjusted p-value (vs STX2-WT)
PPR (EPSC2/EPSC1)	Kruskal-Wallis; Dunn's post-hoc	STX2	12	73	No	15.01	1.679	0.2919	5.987	10.77	20.23	75.84	121.9
		STX2-1A(SNARE)	5	35	Yes	29.75	3.485	0.8529	16.15	24.68	39.86	80.27	185.4	0.0006
		STX2-1A(Nter)	5	35	Yes	24.34	2.624	1.587	11.65	22.06	33.56	69.82	174.6	0.0083
		STX2-1A(Cter)	5	26	Yes	14.79	2.124	2.652	6.315	12.19	20.76	42.32	127.5	>0.9999
		STX1A	12	96	No	13	1.343	0.5457	5.147	8.634	15.95	85.84	108.7	>0.9999

## Sheet: Figure 3J
Parameter measured	Stimulus number (x-axis)	Statistical test	Number of independent cultures	Number of observations	Mean	SEM	Number of observations	Mean	SEM	Adjusted p-value (vs WT)	Number of observations	Mean	SEM	Adjusted p-value (vs WT)	Number of observations	Mean	SEM	Adjusted p-value (vs WT)	Number of observations	Mean	SEM	Adjusted p-value (vs WT)
				STX2			STX2-1A(SNARE)				STX2-1A(Nter)				STX2.1A(Cter)				STX1A
EPSC(X)/EPSC(1)	1	Mixed effect analysis	6	45	1	0	36	1	0	>0.9999	43	1	0	>0.9999	47	1	0	>0.9999	47	1	0	>0.9999
	2	Followed by Tukey's post-hoc			0.698542	0.0428661		0.530606	0.0287654	0.2102		0.55	0.0354077	0.3819		0.904062	0.0610375	0.0752		0.964483	0.0289788	0.0002
	3				0.621875	0.0425377		0.372727	0.0282249	0.0142		0.401429	0.0540544	0.0617		0.784062	0.0627139	0.2508		0.85977	0.0274293	0.0015
	4				0.672708	0.0430443		0.307879	0.0282968	<0.0001		0.3525	0.0364881	0.0011		0.770625	0.0738459	0.7359		0.794943	0.0317012	0.2943
	5				0.636875	0.0504388		0.253636	0.0273682	<0.0001		0.325	0.0338394	0.0017		0.7875	0.0782547	0.3245		0.726782	0.0319731	0.6085
	6				0.551042	0.0384533		0.223939	0.0269818	0.0003		0.281071	0.0288278	0.0103		0.739375	0.0736217	0.1268		0.702759	0.0347338	0.112
	7				0.607292	0.0452904		0.198788	0.0222237	<0.0001		0.318571	0.0427269	0.0047		0.840313	0.0981476	0.029		0.68069	0.0340557	0.7703
	8				0.623542	0.0615315		0.174545	0.0212582	<0.0001		0.258214	0.0375614	0.0001		0.807813	0.0976413	0.1422		0.672529	0.0371481	0.9368
	9				0.607917	0.0533222		0.173333	0.0236638	<0.0001		0.279643	0.0364041	0.0008		0.889687	0.109296	0.0038		0.667931	0.0378301	0.8754
	10				0.559167	0.0488546		0.153939	0.0155818	<0.0001		0.236071	0.0373576	0.001		0.813125	0.106776	0.0128		0.668046	0.039228	0.4147
	11				0.538542	0.0408302		0.159091	0.0201949	<0.0001		0.2575	0.0390449	0.0066		0.862812	0.112851	0.0005		0.630805	0.0283042	0.5841
	12				0.582292	0.046678		0.153636	0.0180583	<0.0001		0.241429	0.0336639	0.0004		0.81125	0.106428	0.0337		0.647011	0.0309401	0.842
	13				0.541667	0.0451616		0.144242	0.0153497	<0.0001		0.256071	0.0336113	0.0054		0.780937	0.0918431	0.0229		0.674483	0.0365458	0.215
	14				0.549167	0.0478267		0.150606	0.0190391	<0.0001		0.28	0.0375401	0.0107		0.760312	0.0988793	0.0626		0.638276	0.0338484	0.6168
	15				0.5125	0.0413443		0.135152	0.0147204	<0.0001		0.2625	0.0301435	0.0223		0.759375	0.104417	0.017		0.625747	0.026627	0.3732
	16				0.588958	0.0704735		0.134848	0.0168276	<0.0001		0.245357	0.0290388	0.0004		0.779375	0.141105	0.1194		0.631954	0.028621	0.9601
	17				0.59875	0.0544636		0.121818	0.0121032	<0.0001		0.259286	0.0325825	0.0004		0.865	0.136974	0.0076		0.650805	0.036877	0.9222
	18				0.524583	0.0517538		0.137576	0.0142955	<0.0001		0.248929	0.0255383	0.0082		0.804688	0.107174	0.0041		0.636207	0.0357395	0.3884
	19				0.532917	0.0515959		0.130606	0.0145445	<0.0001		0.251429	0.0259717	0.0064		0.75	0.100633	0.0512		0.644253	0.0353142	0.3911
	20				0.527083	0.0478834		0.141818	0.0179089	<0.0001		0.238929	0.0324092	0.0048		0.759375	0.103561	0.0298		0.628391	0.0345122	0.4904
	21				0.515625	0.0464606		0.126364	0.0144588	<0.0001		0.220714	0.0303547	0.0036		0.810312	0.112987	0.0021		0.65	0.0335708	0.2046
	22				0.519583	0.0472159		0.132727	0.0167551	<0.0001		0.243571	0.0259742	0.0081		0.75	0.0943067	0.0319		0.648506	0.0350158	0.2424
	23				0.506667	0.0455194		0.131212	0.0173246	<0.0001		0.240714	0.0314505	0.0121		0.80375	0.11138	0.0019		0.622644	0.0299908	0.3482
	24				0.495	0.0400631		0.138182	0.0168013	<0.0001		0.223929	0.026559	0.0099		0.8325	0.11738	0.0002		0.65046	0.0403993	0.0972
	25				0.548125	0.054665		0.125758	0.0163938	<0.0001		0.2325	0.0324063	0.0014		0.83125	0.120308	0.0036		0.633218	0.0369158	0.6579
	26				0.539583	0.0555126		0.130606	0.0166398	<0.0001		0.234643	0.0311443	0.0023		0.765938	0.113408	0.037		0.635172	0.0332193	0.5495
	27				0.5325	0.0455663		0.128182	0.0137238	<0.0001		0.199643	0.0313644	0.0006		0.810625	0.111717	0.0045		0.627011	0.0325234	0.5607
	28				0.481667	0.0401033		0.114848	0.0129401	<0.0001		0.2725	0.0573064	0.0874		0.799063	0.102943	0.0007		0.654253	0.0447655	0.0479
	29				0.438333	0.0384142		0.130909	0.017502	0.001		0.267143	0.0393292	0.2386		0.782188	0.0972596	0.0002		0.652874	0.0432179	0.0059
	30				0.575625	0.0558334		0.120606	0.0139869	<0.0001		0.243929	0.0281687	0.0006		0.836875	0.124597	0.0094		0.642989	0.0371456	0.8215
	31				0.512917	0.0475694		0.128182	0.0168744	<0.0001		0.243214	0.0247691	0.0105		0.78875	0.0998878	0.005		0.651494	0.0362011	0.1784
	32				0.505833	0.038677		0.122424	0.0148988	<0.0001		0.26	0.0423265	0.026		0.765	0.115198	0.0103		0.62908	0.0313936	0.2861
	33				0.495833	0.0373203		0.122121	0.0170935	<0.0001		0.266071	0.0379548	0.0455		0.73375	0.105914	0.0241		0.637471	0.0349511	0.1609
	34				0.572083	0.0536966		0.116667	0.0133262	<0.0001		0.201071	0.0248878	<0.0001		0.804375	0.0999536	0.0298		0.63931	0.0367206	0.8226
	35				0.490833	0.0485315		0.118182	0.0121267	<0.0001		0.243571	0.0336423	0.0247		0.725938	0.102855	0.0268		0.628851	0.0353356	0.1818
	36				0.530833	0.0520313		0.112424	0.0125758	<0.0001		0.226071	0.0263992	0.0023		0.78125	0.102248	0.0148		0.628161	0.0317378	0.5315
	37				0.485208	0.0410511		0.126667	0.0150357	<0.0001		0.241071	0.0325232	0.0276		0.76375	0.101531	0.0044		0.648506	0.0480948	0.0711
	38				0.540625	0.0645857		0.127273	0.017754	<0.0001		0.2625	0.0360981	0.0074		0.860938	0.121573	0.0006		0.624598	0.0344059	0.6692
	39				0.517083	0.0450728		0.126364	0.0170883	<0.0001		0.238929	0.0332353	0.0074		0.830313	0.120352	0.0008		0.641034	0.0376828	0.2804
	40				0.494167	0.0472289		0.113333	0.0134887	<0.0001		0.236071	0.0256572	0.0165		0.794687	0.112772	0.0016		0.647011	0.0400902	0.1074
	41				0.480625	0.0431807		0.132424	0.0157816	0.0001		0.198214	0.0252346	0.0062		0.81	0.111178	0.0004		0.634253	0.0374793	0.1042
	42				0.500833	0.0393101		0.113636	0.0135388	<0.0001		0.246429	0.0372259	0.0189		0.80125	0.120883	0.0016		0.623908	0.0359658	0.2875
	43				0.468542	0.0476011		0.108182	0.0136962	<0.0001		0.2175	0.0225822	0.0215		0.812187	0.124861	0.0002		0.632184	0.0373999	0.0701
	44				0.484167	0.0405086		0.115455	0.0123942	<0.0001		0.246786	0.0380929	0.0351		0.809375	0.12486	0.0004		0.618851	0.0315578	0.2026
	45				0.54125	0.0520141		0.115455	0.0140554	<0.0001		0.278571	0.0400354	0.0138		0.873125	0.142279	0.0003		0.61977	0.0357192	0.7228
	46				0.514167	0.057655		0.120909	0.0149264	<0.0001		0.200357	0.028612	0.0015		0.827187	0.138811	0.0008		0.631954	0.0373793	0.3321
	47				0.514167	0.0474592		0.119394	0.01459	<0.0001		0.229286	0.0264871	0.0056		0.75625	0.099014	0.0205		0.632529	0.0434367	0.3271
	48				0.499792	0.0497543		0.129394	0.0165313	<0.0001		0.21	0.0297165	0.0045		0.73875	0.103608	0.0232		0.632989	0.0414519	0.2124
	49				0.540417	0.0735618		0.114545	0.0147459	<0.0001		0.206429	0.0211708	0.0006		0.723437	0.0939872	0.1473		0.644138	0.049275	0.4659
	50				0.480833	0.0508621		0.110937	0.0129543	<0.0001		0.248214	0.0334603	0.0413		0.75375	0.094521	0.0057		0.625116	0.0379263	0.1483
