# Supplementary material for: The stability of the primed pool of synaptic vesicles and the clamping of spontaneous neurotransmitter release rely on the integrity of the C-terminal half of the SNARE domain of syntaxin-1A
Source: eLife. 2024 Mar 21;12:RP90775. doi: 10.7554/eLife.90775 (PMC10957171; doi:10.7554/eLife.90775)
Supplement: Figure 4—source data 1. [file elife-90775-fig4-data1.xlsx]

## Sheet: Figure 4B
Table 4: Quantification of Munc18-1, STX1A and STX1A chimeras in STX1-null neurons
Parameter measured	Statistical test	Genotype	Number of independent cultures	Number of observations	Parametric distribution 'D'Agostino & Pearson test'	Mean	SEM	Minimum	25% Percentile	Median	75% Percentile	Maximum	Mean ranks	Adjusted p-value (vs STX1- WT)	Adjusted p-value (vs cDKO)
Stx1A/VGlut1 (norm. To STX1A rescue)	Kruskal-Wallis; Dunn's post-hoc	STX1A	4	97	No	1	0.0509	0.1133	0.6297	0.9516	1.256	2.871	173		<0.0001
		STX1A-2(SNARE)	4	61	No	1.46	0.0838	0.3735	0.9158	1.392	1.847	3.579	246.7	0.0002	<0.0001
		STX1A-2(Nter)	4	80	No	1.15	0.05848	0.01487	0.8524	1.084	1.387	2.515	203.9	0.4999	<0.0001
		STX1A-2(Cter)	4	91	Yes	1.045	0.05512	0.05005	0.7099	0.9201	1.356	2.607	182.3	>0.9999	<0.0001
		cDKO	4	32	Yes	0.08345	0.01075	0.004553	0.007257	0.1041	0.126	0.2021	18.91	<0.0001

## Sheet: Figure 4C
Table 4: Quantification of Munc18-1, STX1A and STX1A chimeras in STX1-null neurons
Parameter measured	Statistical test	Genotype	Number of independent cultures	Number of observations	Parametric distribution 'D'Agostino & Pearson test'	Mean	SEM	Minimum	25% Percentile	Median	75% Percentile	Maximum	Mean ranks	Adjusted p-value (vs WT)	Adjusted p-value (vs cDKO)
Munc18-1/VGlut1 (norm. To STX1A rescue)	Kruskal-Wallis; Dunn's post-hoc	STX1A	4	97	Yes	1	0.04382	0.1659	0.653	0.9813	1.253	2.189	169.7		<0.0001
		STX1A-2(SNARE)	4	61	No	1.468	0.1147	0.273	0.8093	1.299	1.715	4.57	225.2	0.0113	<0.0001
		STX1A-2(Nter)	4	80	Yes	1.08	0.0662	0.1555	0.6346	1.026	1.303	3.568	176.2	>0.9999	<0.0001
		STX1A-2(Cter)	4	91	No	1.252	0.05875	0.1294	0.8476	1.211	1.597	2.73	213.1	0.044	<0.0001
		cDKO	4	32	No	0.429	0.05545	0.1458	0.2362	0.2794	0.5568	1.317	51.56	<0.0001

## Sheet: Figure 4E
Table 4: Quantification of Munc18-1, STX1A and STX1A chimeras in STX1-null neurons
	Parameter measured
	EPSC Amplitude (nA)	SEM	Munc18-1/VGlut1 (norm. to STX1A rescue)	SEM
STX1A	6.088	0.5577	1	0.04382
STX1A-2(SNARE)	3.362	0.4629	1.468	0.1147
STX1A-2(Nter)	6.4	0.6299	1.08	0.0662
STX1A-2(Cter)	3.701	0.3216	1.252	0.05875
* p-values are in data sheet 4 "Figure 4C" and data sheet 2 "Figure 2B"

## Sheet: Figure 4F
Table 4: Quantification of Munc18-1, STX1A and STX1A chimeras in STX1-null neurons
	Parameter measured
	RRP (nC)	SEM	Munc18-1/VGlut1 (norm. to STX1A rescue)	SEM
STX1A	0.525	0.0641	1	0.04382
STX1A-2(SNARE)	0.1808	0.02723	1.468	0.1147
STX1A-2(Nter)	0.4621	0.06691	1.08	0.0662
STX1A-2(Cter)	0.2429	0.02746	1.252	0.05875
* p-values are in data sheet 4 "Figure 4C" and data sheet 2 "Figure 2F"

## Sheet: Figure 4G
Table 4: Quantification of Munc18-1, STX1A and STX1A chimeras in STX1-null neurons
	Parameter measured
	PVR (%)	SEM	Munc18-1/VGlut1 (norm. to STX1A rescue)	SEM
STX1A	12.76	1.28	1	0.04382
STX1A-2(SNARE)	17.79	1.394	1.468	0.1147
STX1A-2(Nter)	15.2	1.42	1.08	0.0662
STX1A-2(Cter)	18.15	1.615	1.252	0.05875
* p-values are in data sheet 4 "Figure 4C" and data sheet 2 "Figure 2G"

## Sheet: Figure 4H
Table 4: Quantification of Munc18-1, STX1A and STX1A chimeras in STX1-null neurons
	Parameter measured
	Spontaneous vesicular release rate (s-1)	SEM	Munc18-1/VGlut1 (norm. to STX1A rescue)	SEM
STX1A	0.001784	0.0002011	1	0.04382
STX1A-2(SNARE)	0.02989	0.003094	1.468	0.1147
STX1A-2(Nter)	0.004342	0.0005112	1.08	0.0662
STX1A-2(Cter)	0.01488	0.001573	1.252	0.05875
* p-values are in data sheet 4 "Figure 4C" and data sheet 2 "Figure 2H"
