# Supplementary material for: The stability of the primed pool of synaptic vesicles and the clamping of spontaneous neurotransmitter release rely on the integrity of the C-terminal half of the SNARE domain of syntaxin-1A
Source: eLife. 2024 Mar 21;12:RP90775. doi: 10.7554/eLife.90775 (PMC10957171; doi:10.7554/eLife.90775)
Supplement: Figure 5—source data 1. [file elife-90775-fig5-data1.xlsx]

## Sheet: Figure 5B
Table 5: Quantification of Munc18-1, STX2 and STX2-chimeras in STX1-null neurons
Parameter measured	Statistical test	Genotype	Number of independent cultures	Number of observations	Parametric distribution 'D'Agostino & Pearson test'	Mean	SEM	Minimum	25% Percentile	Median	75% Percentile	Maximum	Mean ranks	Adjusted p-value (vs STX1A-WT)	Adjusted p-value (vs STX2-WT)	Adjusted p-value (vs cDKO)
Stx2/VGlut1 (norm. To STX2 rescue)	Kruskal-Wallis; Dunn's post-hoc	STX1A	4	51	Yes	0.1108	0.007697	0.0271	0.06041	0.1095	0.1502	0.2297	43.1		<0.0001	>0.9999
		STX2		81	Yes	1	0.04495	0.1906	0.6757	0.9904	1.229	1.919	213.4	<0.0001		<0.0001
		STX1A-2(SNARE)	4	68	Yes	1.291	0.09215	0.2785	0.5643	1.264	1.787	3.378	235.5	<0.0001	>0.9999	<0.0001
		STX1A-2(Nter)	4	54	Yes	0.9709	0.06601	0.1808	0.556	1.002	1.339	2.378	206.1	<0.0001	>0.9999	<0.0001
		STX1A-2(Cter)	4	93	No	1.405	0.08715	0.2012	0.7271	1.073	2.074	3.667	246.2	<0.0001	0.7007	<0.0001
		cDKO	4	28	No	0.09042	0.006272	0.001329	0.07449	0.09091	0.1112	0.1504	35.04	>0.9999	<0.0001

## Sheet: Figure 5F
Table 5: Quantification of Munc18-1, STX2 and STX2-chimeras in STX1-null neurons
Parameter measured	Statistical test	Genotype	Number of independent cultures	Number of observations	Parametric distribution 'D'Agostino & Pearson test'	Mean	SEM	Minimum	25% Percentile	Median	75% Percentile	Maximum	Mean ranks	Adjusted p-value (vs STX1A-WT)	Adjusted p-value (vs STX2-WT)	Adjusted p-value (vs cDKO)
Munc18-1/VGlut1 (norm. To STX2 rescue)	Kruskal-Wallis; Dunn's post-hoc	STX1A	4	129	No	1.806	0.08477	0.2786	1.071	1.645	2.487	4.417	352.9		<0.0001	<0.0001
		STX2	4	89	No	1	0.03954	0.309	0.7463	0.9374	1.208	2.526	200.8	<0.0001		0.123
		STX1A-2(SNARE)	4	77	No	1.41	0.06723	0.4724	1.048	1.324	1.674	4.126	306.9	0.7124	0.0003	<0.0001
		STX1A-2(Nter)	4	89	No	0.9349	0.05312	0.1202	0.4408	1.009	1.32	1.956	193.6	<0.0001	>0.9999	<0.0001
		STX1A-2(Cter)	4	119	No	1.899	0.08785	0.3496	1.192	1.728	2.514	4.543	372	>0.9999	<0.0001	0.2555
		cDKO	4	54	No	0.7554	0.0395	0.1987	0.5596	0.6937	0.9037	1.769	127.4	<0.0001	0.123

## Sheet: Figure 5G
Table 5: Quantification of Munc18-1, STX2 and STX2-chimeras in STX1-null neurons
	Parameter measured
	EPSC amplitude (nA)	SEM	Munc18-1/VGlut1 (norm. to STX2 rescue)	SEM
STX1A	4.062	0.3169	1.806	0.08477
STX2	0.3548	0.04176	1	0.03954
STX2-1A(SNARE)	2.623	0.289	1.41	0.06723
STX2-1A(Nter)	0.6854	0.08484	0.9349	0.05312
STX2-1A(Cter)	1.134	0.28	1.899	0.08785
* p-values are in data sheet 4 "Figure 5F" and data sheet 2 "Figure 3B"

## Sheet: Figure 5H
Table 5: Quantification of Munc18-1, STX2 and STX2-chimeras in STX1-null neurons
	Parameter measured
	RRP (nC)	SEM	Munc18-1/VGlut1 (norm. to STX2 rescue)	SEM
STX1A	0.3538	0.03682	1.806	0.08477
STX2	0.07379	0.007426	1	0.03954
STX2-1A(SNARE)	0.1298	0.01764	1.41	0.06723
STX2-1A(Nter)	0.05639	0.007278	0.9349	0.05312
STX2-1A(Cter)	0.1047	0.01563	1.899	0.08785
* p-values are in data sheet 4 "Figure 5F" and data sheet 2 "Figure 3F"

## Sheet: Figure 5I
Table 5: Quantification of Munc18-1, STX2 and STX2-chimeras in STX1-null neurons
	Parameter measured
	PVR(%)	SEM	Munc18-1/VGlut1 (norm. to STX2 rescue)	SEM
STX1A	12.24	1.115	1.806	0.08477
STX2	13	1.245	1	0.03954
STX2-1A(SNARE)	26.66	2.945	1.41	0.06723
STX2-1A(Nter)	23.01	2.325	0.9349	0.05312
STX2-1A(Cter)	13.26	2.082	1.899	0.08785
* p-values are in data sheet 4 "Figure 5F" and data sheet 2 "Figure 3G"

## Sheet: Figure 5J
Table 5: Quantification of Munc18-1, STX2 and STX2-chimeras in STX1-null neurons
	Parameter measured
	Spontaneous vesicle release rate (s-1)	SEM	Munc18-1/VGlut1 (norm. to STX2 rescue)	SEM
STX1A	0.002331	0.0003987	1.806	0.08477
STX2	0.03742	0.00609	1	0.03954
STX2-1A(SNARE)	0.02424	0.004118	1.41	0.06723
STX2-1A(Nter)	0.06106	0.008808	0.9349	0.05312
STX2-1A(Cter)	0.01066	0.003131	1.899	0.08785
* p-values are in data sheet 4 "Figure 5F" and data sheet 2 "Figure 3H"
