# Supplementary material for: The stability of the primed pool of synaptic vesicles and the clamping of spontaneous neurotransmitter release rely on the integrity of the C-terminal half of the SNARE domain of syntaxin-1A
Source: eLife. 2024 Mar 21;12:RP90775. doi: 10.7554/eLife.90775 (PMC10957171; doi:10.7554/eLife.90775)
Supplement: Figure 6—figure supplement 1—source data 1. [file elife-90775-fig6-figsupp1-data1.xlsx]

## Sheet: F6 - fig. Supp. 1B
Table 1: Quantification of Munc18-1, STX1A and STX1A chimeras in STX1-null neurons
Parameter measured	Statistical test	Genotype	Number of independent cultures	Number of observations	Parametric distribution 'D'Agostino & Pearson test'	Mean	SEM	Adjusted p-value (vs STX1- WT)
Stx1A/VGlut1 (norm. To STX1A rescue)	Kruskal-Wallis; Dunn's post-hoc	STX1A-WT	3	211	No	1	0.02511
		D231N	3	140	No	0.5088	0.03036	<0.0001
		R232N	3	116	No	1.422	0.04641	<0.0001
		D231N,R232N	3	93	No	1.307	0.05384	0.0391
		Y235R	3	79	No	0.4622	0.02174	<0.0001
		E238V	3	41	No	0.1004	0.01843	<0.0001
		D231N,E238V	3	60	No	0.2025	0.03597	<0.0001
		V248K	3	88	No	1.026	0.05101	>0.9999
		S249E	3	99	No	1.019	0.04355	>0.9999
		V248K,S249E	3	89	Yes	1.126	0.04061	>0.9999
		STX1-null		99	No	0.04671	0.005047	<0.0001

## Sheet: F6 - fig. Supp. 1C
Table 1: Quantification of Munc18-1, STX1A and STX1A chimeras in STX1-null neurons
Parameter measured	Statistical test	Genotype	Number of independent cultures	Number of observations	Parametric distribution 'D'Agostino & Pearson test'	Mean	SEM	Adjusted p-value (vs STX1- WT)
Stx1A/VGlut1 (norm. To STX1A rescue)	Kruskal-Wallis; Dunn's post-hoc	STX1A-WT	3	232	No	1	0.02511
		D231N	3	168	No	0.985	0.03547	>0.9999
		R232N	3	115	No	1.275	0.03865	<0.0001
		D231N,R232N	3	92	No	1.151	0.04494	0.5605
		Y235R	3	79	No	0.62	0.02494	<0.0001
		E238V	3	72	Yes	0.7268	0.03089	<0.0001
		D231N,E238V	3	63	No	0.718	0.04358	<0.0001
		V248K	3	85	No	1.026	0.04522	>0.9999
		S249E	3	99	Yes	1.021	0.03204	>0.9999
		V248K,S249E	3	89	Yes	1.093	0.03587	>0.9999
		STX1-null	3	100	No	0.3995	0.02497	<0.0001
