# Supplementary material for: The stability of the primed pool of synaptic vesicles and the clamping of spontaneous neurotransmitter release rely on the integrity of the C-terminal half of the SNARE domain of syntaxin-1A
Source: eLife. 2024 Mar 21;12:RP90775. doi: 10.7554/eLife.90775 (PMC10957171; doi:10.7554/eLife.90775)
Supplement: Figure 6—source data 1. [file elife-90775-fig6-data1.xlsx]

## Sheet: Figure 6B
Table 6: Quantification of the neurotransmitter release parameters in STX1-null neurons lentivirally transdicuced with STX1A Cterminal mutations
Parameter measured	Statistical test	Genotype (STX1A)	Number of independent cultures	Number of observations	Parametric distribution 'D'Agostino & Pearson test'	Mean	SEM	Adjusted p-value (vs STX1A- WT)	Parameter measured	Mean	SEM	Mean	SEM	Mean	SEM
EPSC amplitude (norm. To STX1A rescue)	Kruskal-Wallis; Dunn's post-hoc	STX1A-WT	9	95	Yes	1	2.887e-05		EPSC Amplitude (Absolute values)	6.284	0.5826	5.971	0.6833	5.091	0.5896
		STX1A-2(SNARE)*	4	37	No	0.5237	0.07209	<0.001
		STX1A-2(Cter)*	4	41	No	0.5763	0.05009	0.1392
		D231N	3	34	Yes	1.243	0.1239	<0.001						6.33	0.6305
		R232N	3	27	Yes	1.328	0.1566	>0.9999				7.93	0.9351
		D231N,R232N	3	26	No	0.992	0.1423	>0.9999				5.923	0.8494
		Y235R	3	31	No	1.085	0.1709	>0.9999		6.817	1.074
		E238V	3	34	No	1.379	0.2056	>0.9999						7.018	1.047
		D231N,E238V	3	36	No	1.247	0.1496	>0.9999						6.347	0.7614
		V248K	3	31	No	1.089	0.1883	>0.9999		6.843	1.184
		S249E	3	33	Yes	1.46	0.1662	>0.9999		9.176	1.044
		V248K,S249E	3	32	Yes	0.9919	0.1081	>0.9999		6.233	0.6791
*values taken from data in figure 2. Normalized to their corresponding STX1A. Here for represemtational purposes

## Sheet: Figure 6C
Table 6: Quantification of the neurotransmitter release parameters in STX1-null neurons lentivirally transdicuced with STX1A Cterminal mutations
Parameter measured	Statistical test	Genotype (STX1A)	Number of independent cultures	Number of observations	Parametric distribution 'D'Agostino & Pearson test'	Mean	SEM	Adjusted p-value (vs STX1A- WT)	Parameter measured	Mean	SEM	Mean	SEM	Mean	SEM
RRP (norm. to STX1A rescue)	Kruskal-Wallis; Dunn's post-hoc	STX1A-WT	9	75	Yes	1	2.887e-05		RRP (Absolute values)	0.39	0.07358	0.4696	0.08775	0.4085	0.04742
		STX1A-2(SNARE)*	4	37	No	0.3443	0.05186	<0.001
		STX1A-2(Cter)*	4	41	No	0.4626	0.0523	0.1392
		D231N	3	31	Yes	1.202	0.1613	>0.9999						0.491	0.06588
		R232N	3	24	Yes	0.8704	0.1225	>0.9999				0.4088	0.05754
		D231N,R232N	3	22	Yes	0.424	0.07538	0.3739				0.1991	0.0354
		Y235R	3	27	No	1.406	0.3018	>0.9999		0.5485	0.1177
		E238V	3	30	No	1.289	0.1947	>0.9999						0.5266	0.07954
		D231N,E238V	3	27	No	0.8924	0.1604	>0.9999						0.3645	0.06554
		V248K	3	26	Yes	1.245	0.2603	>0.9999		0.4854	0.1015
		S249E	3	28	No	1.176	0.2429	>0.9999		0.4586	0.09471
		V248K,S249E	3	29	No	1.086	0.2197	>0.9999		0.4234	0.08567
	*values taken from data in figure 2. Normalized to their corresponding STX1A. Here for represemtational purposes

## Sheet: Figure 6D
Table 6: Quantification of the neurotransmitter release parameters in STX1-null neurons lentivirally transdicuced with STX1A Cterminal mutations
Parameter measured	Statistical test	Genotype (STX1A)	Number of independent cultures	Number of observations	Parametric distribution 'D'Agostino & Pearson test'	Mean	SEM	Adjusted p-value (vs STX1A- WT)	Parameter measured	Mean	SEM	Mean	SEM	Mean	SEM
PVR (norm. To STX1A recue)	Kruskal-Wallis; Dunn's post-hoc	STX1A-WT	9	72	Yes	1	2.887e-05		PVR (Absolute values)	20.61	3.088	16.01	2.72	17.13	2.993
		STX1A-2(SNARE)*	4	37	No	1.394	0.1092	<0.001
		STX1A-2(Cter)*	4	41	No	1.422	0.1265	0.1392
		D231N	3	31	No	0.93	0.09298	>0.9999						15.93	1.593
		R232N	3	23	No	1.48	0.2287	>0.9999				23.69	3.661
		D231N,R232N	3	20	Yes	1.956	0.2474	0.0121				31.31	3.96
		Y235R	3	27	Yes	0.8515	0.108	>0.9999		17.55	2.226
		E238V	3	28	No	0.8913	0.1304	>0.9999						15.27	2.234
		D231N,E238V	3	24	Yes	1.05	0.1173	>0.9999						17.99	2.009
		V248K	3	26	No	0.6361	0.07686	>0.9999		13.11	1.584
		S249E	3	27	Yes	1.223	0.1473	0.5161		25.2	3.036
		V248K,S249E	3	29	No	1	0.08427	>0.9999		20.62	1.737
	*values taken from data in figure 2. Normalized to their corresponding STX1A. Here for represemtational purposes

## Sheet: Figure 6E
Table 6: Quantification of the neurotransmitter release parameters in STX1-null neurons lentivirally transdicuced with STX1A Cterminal mutations
Parameter measured	Statistical test	Genotype (STX1A)	Number of independent cultures	Number of observations	Parametric distribution 'D'Agostino & Pearson test'	Mean	SEM	Adjusted p-value (vs STX1A- WT)	Parameter measured	Mean	SEM	Mean	SEM	Mean	SEM
mEPSC frequency (norm. To STX1A rescue)	Kruskal-Wallis; Dunn's post-hoc	STX1A-WT	9	80	Yes	1	2.5e-05		mEPSC frequency (Absolute values)	3.886	0.6798	6.839	0.8435	5.774	0.898
		STX1A-2(SNARE)*	4	37	No	3.113	0.1467	<0.001
		STX1A-2(Cter)*	4	41	No	2.964	0.1548	0.1392
		D231N	3	33	Yes	2.384	0.2415	0.0005						13.76	1.394
		R232N	3	26	Yes	2.161	0.2616	0.0321				14.14	1.712
		D231N,R232N	3	25	No	2.49	0.2917	0.0027				16.29	1.908
		Y235R	3	27	No	2.621	0.3648	0.0105		10.19	1.418
		E238V	3	30	No	1.847	0.2187	0.0907						10.66	1.263
		D231N,E238V	3	31	No	2.826	0.287	<0.0001						16.32	1.657
		V248K	3	28	No	2.172	0.4203	0.3986		8.439	1.633
		S249E	3	32	Yes	2.861	0.3791	0.0019		11.12	1.473
		V248K,S249E	3	32	Yes	4.181	0.4067	<0.0001		16.25	1.581
	*values taken from data in figure 2. Normalized to their corresponding STX1A. Here for represemtational purposes

## Sheet: Figure 6F and G
Table 6: Quantification of the neurotransmitter release parameters in STX1-null neurons lentivirally transdicuced with STX1A Cterminal mutations
Parameter measured	Statistical test	Genotype (STX1A)	Number of independent cultures	Number of observations	Parametric distribution 'D'Agostino & Pearson test'	Mean	SEM	Adjusted p-value (vs STX1A- WT)	Parameter measured	Mean	SEM	Mean	SEM	Mean	SEM
Spontaneous vesicle release rate (norm. To STX1A rescue)	Kruskal-Wallis; Dunn's post-hoc	STX1A-WT	9	61	No	1	4.787e-05		Spontaneous vesicle release rate (Absolute values)	0.001757	0.000423	0.005761	0.003541	0.001937	0.0004326
		STX1A-2(SNARE)*	4	37	No	16.75	1.734	<0.001
		STX1A-2(Cter)*	4	41	No	8.342	0.882	0.1392
		D231N	3	22	No	2.311	0.4781	0.0075						0.004477	0.000926
		R232N	3	23	No	1.152	0.2179	>0.9999				0.006639	0.001255
		D231N,R232N	3	22	No	3.938	1.002	0.005				0.02269	0.005772
		Y235R	3	25	No	2.321	0.5301	0.3096		0.004077	0.0009314
		E238V	3	20	Yes	1.624	0.2373	0.1323						0.003146	0.0004597
		D231N,E238V	3	17	Yes	3.661	0.6932	<0.0001						0.007092	0.001343
		V248K	3	25	No	1.416	0.3125	>0.9999		0.002489	0.000549
		S249E	3	26	No	2.624	0.5017	0.0105		0.004611	0.0008814
		V248K,S249E	3	28	Yes	4.2	0.4613	<0.0001		0.00738	0.0008105
	*values taken from data in figure 2. Normalized to their corresponding STX1A. Here for represemtational purposes
